# Supplementary material for: Burden of non-accidental mortality attributable to ambient temperatures: a time series study in a high plateau area of southwest China
Source: PubMed Central journal article supplement — BMJ Open. 2019 Feb 15;9(2):e024708. doi: 10.1136/bmjopen-2018-024708 (PMC6398624; doi:10.1136/bmjopen-2018-024708), 2019-02-15
Supplement: bmjopen-2018-024708.draft_revisions.pdf [file bmjopen-2018-024708.draft_revisions.pdf]

# BMJ Open

BMJ Open is committed to open peer review. As part of this commitment we make the peer review history of every article we publish publicly available.

When an article is published we post the peer reviewers' comments and the authors' responses online. We also post the versions of the paper that were used during peer review. These are the versions that the peer review comments apply to.

The versions of the paper that follow are the versions that were submitted during the peer review process. They are not the versions of record or the final published versions. They should not be cited or distributed as the published version of this manuscript.

BMJ Open is an open access journal and the full, final, typeset and author-corrected version of record of the manuscript is available on our site with no access controls, subscription charges or pay-per-view fees (<http://bmjopen.bmj.com>).

If you have any questions on BMJ Open's open peer review process please email [info.bmjopen@bmj.com](mailto:info.bmjopen@bmj.com)

# BMJ Open

## Burden of non-accidental mortality and subgroups by specific causes and individual characteristics attributable to ambient temperatures in Yuxi, China

|                               |                                                                                                                                                                                                                                                                                                                                                                                                                                                                                                                                                                                                                                                                                                                                                                                                                                                                                                                                                                                        |
|-------------------------------|----------------------------------------------------------------------------------------------------------------------------------------------------------------------------------------------------------------------------------------------------------------------------------------------------------------------------------------------------------------------------------------------------------------------------------------------------------------------------------------------------------------------------------------------------------------------------------------------------------------------------------------------------------------------------------------------------------------------------------------------------------------------------------------------------------------------------------------------------------------------------------------------------------------------------------------------------------------------------------------|
| Journal:                      | <i>BMJ Open</i>                                                                                                                                                                                                                                                                                                                                                                                                                                                                                                                                                                                                                                                                                                                                                                                                                                                                                                                                                                        |
| Manuscript ID                 | bmjopen-2018-024708                                                                                                                                                                                                                                                                                                                                                                                                                                                                                                                                                                                                                                                                                                                                                                                                                                                                                                                                                                    |
| Article Type:                 | Research                                                                                                                                                                                                                                                                                                                                                                                                                                                                                                                                                                                                                                                                                                                                                                                                                                                                                                                                                                               |
| Date Submitted by the Author: | 12-Jun-2018                                                                                                                                                                                                                                                                                                                                                                                                                                                                                                                                                                                                                                                                                                                                                                                                                                                                                                                                                                            |
| Complete List of Authors:     | Deng, Changyu; Department of Preventive Medicine, Shantou University Medical College<br>Ding, Zan; Department of Science and Education, Baoan Central Hospital of Shenzhen, Shenzhen, Guangdong 518102, China<br>LI, Liujiu; Yuxi Center for Disease Control and Prevention, Yuxi, Yunnan 653000, China<br>Wang, Yanfang; Yuxi Center for Disease Control and Prevention, Yuxi, Yunnan 653000, China<br>Guo, Pi; Department of Preventive Medicine, Shantou University Medical College, Shantou, Guangdong 515041, China<br>Yang, Shaoyi; Department of Preventive Medicine, Shantou University Medical College, Shantou, Guangdong 515041, China<br>Liu, Ju; Department of Preventive Medicine, Shantou University Medical College, Shantou, Guangdong 515041, China<br>Wang, Yue; Department of Preventive Medicine, Shantou University Medical College, Shantou, Guangdong 515041, China<br>Zhang, qingying; Department of Preventive Medicine, Shantou University Medical College, |
| Keywords:                     | ambient temperatures, attributable fraction, attributable number, mortality, effect modification                                                                                                                                                                                                                                                                                                                                                                                                                                                                                                                                                                                                                                                                                                                                                                                                                                                                                       |

SCHOLARONE™  
Manuscripts

1  
2  
3 **Burden of non-accidental mortality and subgroups by**  
4 **specific causes and individual characteristics attributable to**  
5 **ambient temperatures in Yuxi, China**  
6  
7  
8  
9

10  
11 Changyu Deng <sup>a,1</sup>, Zan Ding <sup>b,1</sup>, Liujiu Li <sup>c</sup>, Yanfang Wang <sup>c</sup>, Pi Guo <sup>a</sup>, Shaoyi Yang <sup>a</sup>,  
12 Ju Liu <sup>a</sup>, Yue Wang <sup>a</sup>, Qingying Zhang <sup>a,\*</sup>  
13

14  
15  
16 <sup>a</sup> Department of Preventive Medicine, Shantou University Medical College, Shantou,  
17 Guangdong 515041, China  
18

19 <sup>b</sup> Department of Science and Education, Baoan Central Hospital of Shenzhen,  
20 Shenzhen, Guangdong 518102, China  
21

22 <sup>c</sup> Yuxi Center for Disease Control and Prevention, Yuxi, Yunnan 653000, China  
23  
24  
25

26 <sup>1</sup> These authors contributed equally to this work (Changyu Deng, Zan Ding).  
27

28 \* Correspondence to: Department of Preventive Medicine, Shantou University  
29 Medical College, Shantou, Guangdong 515041, China. E-mail: qyzhang@stu.edu.cn  
30 (Q. Zhang).  
31  
32  
33  
34  
35  
36  
37  
38  
39  
40  
41  
42  
43  
44  
45  
46  
47  
48  
49  
50  
51  
52  
53  
54  
55  
56  
57  
58  
59  
60

## Abstract

*Objective:* To examine the total non-accidental mortality burden attributable to ambient temperatures and assess the effect modification of the burden by specific causes and individual characteristics in Yuxi, China.

*Methods:* Using daily mortality and meteorological data from 2009–2016, we applied a quasi-Poisson model combined with a distributed lag non-linear model to estimate the temperature–mortality association with the assessment of attributable fraction and number. We calculated attributable fractions and deaths with 95% empirical confidence intervals (eCIs), that were due to cold and heat, defined as temperatures below and above the median temperature, and for mild and extreme temperatures, defined by cutoffs at the 2.5th and 97.5th temperature percentiles.

*Results:* We analyzed 89,467 non-accidental deaths; 4,131 were attributable to overall temperatures, with an attributable fraction of 4.75% (95% eCI 2.33, 6.79). Most of the mortality burden was caused by cold (4.08%; 0.86, 7.12), while the burden due to heat was low and non-significant (0.67%; -2.44, 3.64). Extreme cold (1.17%; 0.58, 1.69) was responsible for 24.6% (i.e., 1.17% divided by 4.75%) of the total death burden. In the stratification analyses, attributable risk due to cold was higher for cardiovascular than respiratory disease (6.18% vs 3.50%). We found a trend of risk of increased death due to ambient temperatures with increasing age, with attributable fractions of 1.83%, 2.27%, and 6.87% for age  $\leq 64$ , 65 – 74, and  $\geq 75$  years old. The cold-related burden was slightly greater for females, farmers, ethnic minorities, and non-married individuals than their corresponding categories.

*Conclusions:* Most of the burden of death in Yuxi, China was attributable to cold, and specific causes and individual characteristics might modify the mortality burden attributable to ambient temperatures.

*Key words:* ambient temperatures; attributable fraction; attributable number; mortality; effect modification

## Strengths and limitations of this study

- Mortality burden attributable to ambient temperature was assessed in a high plateau city in China.

- This study will for the first time evaluate the relationship between mortality burden and ambient temperature modified by national minority and occupation.
- The data only come from one city, so it should be cautious to generalize the findings to other geographic areas or climates.
- We used the data on temperature from fixed sites rather than measuring individual exposure, which may bring about measurement errors since indoor temperature is not closely correlated with outdoor temperature due to the use of air conditioning.

## 1. Introduction

With the global climate change, ambient temperatures has been extensively demonstrated to directly affect human health (e.g., daily morbidity and mortality) and has become one of the most severe public health problems in the world.[1-5] Exposure to extreme weather such as cold spells and heat waves represents high risk for mortality, and the extreme temperature-related mortality is expected to increase with the increasing frequency, intensity, and duration of extreme weather events.[4,6-8] Low and high temperatures are also well known to be associated with a substantial increase in a wide range of all-cause and cause-specific mortality (e.g., cardiovascular and respiratory diseases).[6,9-12]

Numerous epidemiological studies have widely used ratio measures (e.g., odds ratio, relative ratio, or rate ratio) to quantify the relationships between ambient temperatures and human health, but these offer limited information on the excess burden and actual impact of ambient temperatures.[13-15] Relative excess measures (e.g., attributable fraction) and absolute excess measures (e.g., attributable number), calculated on the basis of the estimated relative risk, have been pointed out to provide better scientific evidence for estimating the potential benefits of preventative measures, public health interventions, and resource allocation.[11,16,17] The attributable fraction and number represent the fraction and number of cases or deaths from a cause-specific disease that would be prevented without exposure to a specific risk factor, which has important implications for policy making and the potential impact of interventions.[18-20]

1  
2  
3 Use of risk assessment of the attributable fraction revealed the burden of  
4 mortality associated with ambient temperatures; however, most previous literatures  
5 estimated the mortality burden in high-income or low-altitude regions or  
6 coastlands,[11,16,19,21-23] and few were conducted in high plateau areas of  
7 developing countries.[12,24] The attributable fraction and number for the  
8 temperature–mortality association may vary by geographic features, climate, and  
9 structure of the population.[24,25] In addition, age, gender, educational attainment,  
10 and specific causes were previously identified as modifiers for estimating the effect  
11 modification of the mortality risk attributable to ambient temperatures.[26-30]  
12 However, few researchers have focused on the potential effect modification of the  
13 mortality burden by occupation, race/ethnicity, or marital status.[31]

14  
15  
16  
17  
18  
19  
20  
21 Yuxi city is located in a high-altitude area in southwest China and experiences a  
22 unique, subtropical, plateau monsoon climate. More than 70% of indigenous people in  
23 this multi-ethnic region engage in agricultural production. The aim of this current  
24 ecological dissertation in Yuxi was to quantify the burden of non-accidental mortality  
25 attributable to ambient temperatures. We aimed to separate the contribution of  
26 temperature to mortality by heat and cold and mild and extreme temperatures by using  
27 attributable fraction and number, based on a proposed framework of attributable risk  
28 assessment within a distributed lag non-linear model (DLNM). A more in-depth  
29 purpose was to comprehensively assess the effect modification of the non-accidental  
30 mortality burden attributable to ambient temperatures by specific mortality causes (i.e.,  
31 cardiovascular, heart, stroke, and respiratory diseases) and individual characteristics  
32 (i.e., age, gender, occupation, ethnicity, and marital status).

## 33 34 35 36 37 38 39 40 41 42 **2. Methods**

### 43 44 **2.1 Study site**

45 Located on the western edge of the Yunnan-Guizhou Plateau of southwest China,  
46 the Yuxi city area has complicated geographic features of mountains, valleys, plateaus,  
47 and basins. With an average altitude of about 2000m and 4 spring-like seasons, this  
48 area has a unique, subtropical, plateau monsoon climate, showing diversified climates  
49 with low atmospheric pressure, thin and dry air, and low seasonal variation in  
50 temperature. From the national population census in 2010, the permanent population  
51  
52  
53  
54  
55  
56  
57  
58  
59  
60

1  
2  
3 is about 2.3 billion, and residents of ethnic minorities (e.g., Dai, Hui, Yi, Hani, and  
4 Mongolian minorities) account for 32.27% of the total population.  
5

## 6 **2.2 Data collection**

7  
8 Individual records such as age of death, gender, ethnicity, occupation, marital  
9 status, cause of death, and date of death for all registered deaths for the period January  
10 1, 2009 to May 31, 2016, were obtained from the Yuxi Center for Disease Control and  
11 Prevention. The underlying causes of death were classified by medical personnel, and  
12 examination procedures were routinely performed to ensure accurate data, based on  
13 the *International Classification of Diseases*, 10th revision (ICD-10). Individual data  
14 were collapsed into a series of daily counts for the total non-accidental mortality  
15 (ICD-10 A00–R99) as well as subcategories by specific cause of death  
16 (cardiovascular [I00–I99], heart [I00–I51], stroke [I60–I69], and respiratory disease  
17 [J00–J99]), age (0–64, 65–74, and 75+ years old), gender (male and female),  
18 occupation (farmer and non-farmer), ethnicity (Han nationality and ethnic minorities),  
19 and marital status (married and non-married). Daily meteorological data for the same  
20 period were obtained from the China Meteorological Data Sharing System, including  
21 mean temperature and 4 other meteorological variables (atmospheric pressure, wind  
22 speed, sunshine duration, and relative humidity).  
23  
24  
25  
26  
27  
28  
29  
30  
31  
32

## 33 **2.3 Patient and public involvement**

34  
35 This study is based on daily death number data, which could be obtained from  
36 Yuxi Center for Disease Control and Prevention without referral and free of charge.  
37 There was no patient and decedent involvement in the presented study.  
38  
39  
40

## 41 **2.4 Statistical analysis**

42  
43 As daily death number under a Poisson distribution and risk of mortality depend  
44 on exposure to temperatures of the current and previous days,<sup>[24]</sup> we applied a  
45 standard time-series quasi-Poisson regression model combined with DLNM to  
46 estimate the non-linear and lag effects of mean temperature on mortality, with day of  
47 the week, long-term trends, and the 4 other meteorological variables as potential  
48 covariates. This model can capture the complex non-linear relation and lagged effect  
49 by combining 2 functions that define the conventional exposure–response association  
50 and the additional lag–response association. The maximum lag period was set to 28  
51 days to explore the lag structure of temperature effect, and median temperature  
52  
53  
54  
55  
56  
57  
58  
59  
60

(17.0°C) was the reference to calculate attributable risk.[31] We used natural cubic splines with 7 degrees of freedom (*df*) per year for time to describe the long-term trends and seasonality and 3 *df* for the 4 other meteorological indicators. These model specifications were consistent with previous studies.[23,32]

The total mortality burden attributable to non-reference temperatures can be assessed in terms of fraction and number of deaths, and the attributable number can be obtained from the sum of the contributions from all days in the series; its ratio with total number of deaths produces the total attributable fraction.[18] The overall cumulative relative risk corresponding to each day's temperature was used to compute the attributable fraction and number:

$$AF_{x,t} = 1 - \exp\left(-\sum_{l=0}^L \beta_{x_{t-l}}, l\right)$$

$$AN_{x,t} = AF_{x,t} \times n_t$$

where  $AF_{x,t}$  and  $AN_{x,t}$  are the attributable fraction and the number of cases at day  $t$  (1,2,3...2907), respectively;  $\beta_x$  is the risk associated with the exposure to ambient temperatures at level  $x$  (i.e.,  $\beta_x = (x - Ref) \times \beta$ ;  $Ref$  is the referenced temperature;  $\beta$  is the coefficient for DLNM of mean temperature;  $L$  is the maximum lag for the effect of mean temperature; and  $n_t$  is the observed number of deaths at day  $t$ .

To estimate the mortality burden from non-accidental deaths, we calculated the total attributable fraction due to the overall temperatures and divided the total effect into exposure to low and high temperatures by summing the subsets corresponding to days with temperatures below and above the median temperature. Also, we explored the mortality burden attributable to mild and extreme temperatures. Extreme cold and heat were defined as temperatures below the 2.5<sup>th</sup> percentile and above the 97.5<sup>th</sup> percentile of mean temperature, and mild cold and heat were defined as the range between the median temperature and these cutoffs. Monte-Carlo simulations were used to calculate the empirical confidence intervals (eCIs) of the attributable fraction and number, assuming a multivariate normal distribution of the best linear unbiased predictions of the deduced coefficients. All statistical analyses involved use of R v3.0.3, with the “dlnm” package to create the DLNM for mean temperature.

### 3. Results

#### 3.1 Descriptive statistics



We analyzed 89,467 non-accidental deaths from Yuxi from 2009–2016, with an average of 33 deaths per day (range 12 to 72). The number of deaths due to cardiovascular disease was 41,794 (46.7%), more than half due to stroke; the proportion due to respiratory disease was 18.5% (Table 1). In individual characteristics subgroup, a higher proportion of deaths were for males, older people ( $\geq 75$  years), people with Han nationality, farmers and married people than their corresponding categories. During the study period, the mean daily temperature was  $16.1^{\circ}\text{C}$  (ranging from  $-3.3$  to  $25.6^{\circ}\text{C}$ ) (Table S1). The daily number of non-accidental deaths and mean temperature showed an inverse relation (Figure 1).

### 3.2 Exposure–response association

The overall effect of mean temperature on mortality (i.e., the total non-accidental deaths and by specified causes and individual characteristics) for lag 0–28 days and mean daily temperature distribution are in Figure 2. In general, the temperature–mortality associations were nonlinear and followed slide-shaped curves: the risks due to heat (both mild and extreme) were low and changed slightly (approximately 1), whereas the risks due to mild cold and especially extreme cold were increased. The relative risks rapidly increased with decreasing mean temperature. The distribution of mean daily temperature was skewed to the left.

### 3.3 Attributable fraction and number

Table 2 shows the estimated attributable fraction with 95% eCIs of daily non-accidental mortality calculated for total and separate components by heat and cold temperatures. For total non-accidental deaths, the attributable fraction was 4.75% (95% eCI 2.33, 6.79) with the whole temperature range, including heat and cold. Cold temperature was responsible for most of the mortality burden, corresponding to an attributable risk of 4.08% (0.86, 7.12), whereas the burden due to heat was low and non-significant (0.67%; -2.44, 3.64). The attributable risks of cardiovascular and stroke deaths caused by overall temperatures were 5.97% (2.74, 8.74) and 6.50% (2.22, 10.16); the point-estimated risk due to cold was higher for cardiovascular than respiratory deaths (6.18% vs 3.50%).

On stratification by age, the attributable risk due to ambient temperatures increased with age, with attributable fractions of 1.83%, 2.27%, and 6.87% for age  $\leq 64$ , 65–74, and  $\geq 75$  years, respectively. Those engaged in agriculture had higher attributable fraction, 3.23 times (5.66% vs 1.75%) due to the overall temperatures and 3.98 times (4.93% vs 1.24%) due to cold, than non-farmers. The estimated burden due

1  
2  
3 to cold was 2.35-fold higher for ethnic minorities than Han nationality (6.55% vs  
4 2.79%), whereas the point-estimated attributable fraction caused by the whole  
5 temperature range was approximately equal by gender and marital status.  
6

7  
8 Table 3 displays the estimated mortality fraction attributable to overall  
9 temperatures, separated by mild and extreme temperatures. In general, the risk of non-  
10 accidental deaths attributable to extreme cold was 1.17% (0.58, 1.69), accounting for  
11 a clearly high proportion of 24.6% of the total mortality burden (4.75%) due to the  
12 whole temperature range, whereas attributable risks due to mild cold or heat or  
13 extreme heat were non-significant. In the cause-specific analyses, the attributable  
14 fractions due to extreme cold were 1.57%, 1.63%, and 1.49% for cardiovascular  
15 disease, stroke, and heart disease, with no significant association with respiratory  
16 disease. The extreme cold-related burden for older people, females, farmers, and non-  
17 married individuals was slightly higher than their corresponding categories.  
18  
19

20  
21 Table S2 presents the attributable number of deaths due to mean temperature,  
22 overall and by cold and heat. An estimated 4,131 non-accidental deaths were due to  
23 overall temperatures and 3,482 to cold. Table S3 shows the excess mortality due to  
24 extreme and mild cold and mild and extreme heat. Figures 3 and S1 illustrate the daily  
25 deaths attributable to cold and heat. The attributable deaths were much larger with  
26 cold than heat.  
27  
28  
29

### 30 31 32 33 **3.4 Sensitivity analysis**

34  
35 Sensitivity analysis to check the stability of our main findings involved changing  
36 the maximum lag days (7, 14, and 21) and the *df* of the natural cubic splines for the  
37 calendar time (5, 6, 8, and 9 per year) and for the 4 other meteorological variables one  
38 by one (2, 4, and 5). The attributable fractions for non-accidental mortality due to  
39 overall temperatures were relatively robust with sensitivity analyses (Table S2) and  
40 the results by causes of deaths and individual characteristics were robust (results not  
41 shown).  
42  
43  
44  
45  
46  
47

## 48 49 **4. Discussion**

50  
51 We quantitatively estimated the attributable risks of non-accidental death and  
52 subgroups by specific causes and individual characteristics due to the whole  
53 temperature range and to extreme and mild cold and mild and extreme heat for 89,467  
54 deaths between 2009 and 2016 in Yuxi, China, a high-altitude region with a unique,  
55  
56  
57  
58  
59

1  
2  
3 subtropical, plateau monsoon climate. The temperature–mortality associations were  
4 nonlinear and followed slide-shaped curves, and the risks rapidly increased with  
5 decreasing mean temperature. Excess deaths were attributable to overall temperatures,  
6 and cold was responsible for most of the mortality burden. The estimated mortality  
7 burden attributable to cold was greater for cardiovascular deaths, older people,  
8 farmers, ethnic minorities, and non-married individuals than their corresponding  
9 categories.  
10  
11  
12  
13

14 In the present study, all of the cause-specific deaths we examined were closely  
15 related to ambient temperatures. The relations were non-linear, with increased relative  
16 risk with low temperature, especially extreme cold; however, the risk of high  
17 temperature changed minimally. A number of researchers have found that the  
18 temperature–response association presents a “U” or “V” shape, with increased  
19 mortality risks at extremely low and high temperatures.[25,33-35] We also examined  
20 additional non-accidental deaths attributable to ambient temperatures, with larger  
21 burden due to cold than heat. A multi-country observational study estimated a total  
22 mortality burden of death attributable to non-optimal ambient temperatures; the  
23 attributable fraction ranged from 3.37% in Thailand to 11% in China, which provides  
24 strong evidence for substantial differences between regions or climates.[16]  
25  
26  
27  
28  
29  
30  
31

32 The cold-related mortality burden is an important public health problem in Yuxi.  
33 Findings from our study showed most of the death burden attributable to low  
34 temperature, and a much lower and non-significant burden due to heat. Previous  
35 studies have found that most of the mortality burden is caused by exposure to cold  
36 days, with comparatively lower attributable risk, or even none, due to heat exposure.  
37 For example, [Hajat et al. \(2006\)](#) showed that all-cause mortality attributable to heat  
38 ranged from 0.37% in London (1976–2003) to 1.45% in Milan (1985–2002), and  
39 another study conducted in London from 1986 to 1996 found that attributable fraction  
40 of mortality for each 1°C decrease below a threshold of 15°C was 5.42% (4.13, 6.69),  
41 with no burden due to heat.[36] Although extremely low or high temperature  
42 corresponded to increased relative risk of mortality, [Gasparrini et al. \(2015\)](#) found a  
43 relatively small part of the death burden attributable to extreme cold temperature,  
44 ranging from 0.25% to 1.06%. Similar results from 5 East Asian regions showed a  
45 9.36% mortality burden attributable to overall temperatures, with only 0.80% due to  
46 extreme cold [19]. However, our current study estimated a larger proportion of  
47 attributable mortality fraction due to extreme cold, accounting for about one-quarter  
48  
49  
50  
51  
52  
53  
54  
55  
56  
57  
58  
59  
60

1  
2  
3 of the total mortality burden (1.17% vs 4.75%), even though extreme cold days  
4 represented only 2.5% of the whole study period. We found no evidence of additional  
5 deaths due to extreme heat in all categories.  
6

7  
8 Exposure to low temperature has been widely demonstrated to be strongly  
9 associated with excess cardiovascular and respiratory deaths,[19,30,37,38] and the  
10 biological processes that underlie cold-related mortality are associated with cardio-  
11 respiratory disease.[11,16,30,39] We found a higher point-estimated attributable risk  
12 caused by cold for cardiovascular than respiratory disease deaths. A multi-city study  
13 including 15 Chinese megacities also identified 15.8% of the cardiovascular mortality  
14 burden due to cold days.[25] The increased cold-related cardiovascular deaths mainly  
15 involved changes in vascular tone, autonomic nervous system response, arrhythmia,  
16 and oxidative stress.[40-42] Although we found no evidence for excess burden of  
17 respiratory deaths due to cold or heat, other reports have described increased  
18 respiratory deaths attributable to ambient temperatures.[10,43] For heart and stroke,  
19 the burden of mortality was attributable to only extreme cold, with approximately  
20 equivalent values, and other studies found excess heart and stroke deaths attributable  
21 to low and/or high temperatures.[23,26,37,44]  
22  
23  
24  
25  
26  
27  
28  
29

30 Age has been frequently identified as an important modifier of the association  
31 between ambient temperatures and human health.[15,25,29,45] We found that  
32 exposure to cold, particularly extreme cold, was closely related to increased death  
33 burden for older than younger people. Several previous surveys found increased age  
34 associated with point-estimated attributable risk of cardiovascular mortality and both  
35 intra-cerebral hemorrhage and ischemic stroke morbidity due to cold, with the highest  
36 values in older people.[25,31] Another nationwide study in Japan found most of the  
37 proportion of morbidity burden attributable to days with low temperature in all age  
38 groups, with an trend of increasing attributable risk with age: the attributable fraction  
39 due to cold was 15.96%, 24.84%, and 28.10% with age 18–64, 65–74, and 75–110  
40 years, respectively.[33] Older people were more vulnerable to the temperature effects,  
41 mainly because they often have multiple pre-existing chronic conditions and  
42 physiological changes in thermoregulation and homeostasis.[46,47] However, the  
43 effect modification of temperature-related mortality by gender has been  
44 identified.[23,29,33,48] We observed a higher mortality burden caused by exposure to  
45 the cold period among females than males in Yuxi, and the cold-related attributable  
46 risk was found higher for females than males in Hanoi, Vietnam,[49] and in 47 cities  
47  
48  
49  
50  
51  
52  
53  
54  
55  
56  
57  
58  
59  
60

1  
2  
3 in Japan.[33] The reason for the discrepancy in temperature-related burden by gender  
4 might be owing to differences in occupational exposure, physiology and  
5 thermoregulation.  
6

7  
8 A survey in Adelaide, South Australia, provided epidemiological evidence for  
9 the impact of heat waves on worker health and safety, which implied that personal  
10 occupation might modify the temperature–mortality association.[50] Our previous  
11 studies (Ding et al., 2016a, 2016b) revealed that farmers were more likely than non-  
12 farmers to die on high DTR or cold days, and the present study also showed a higher  
13 mortality burden attributable to cold and extreme cold days for farmers than non-  
14 farmers. In southwestern China, farmers universally have a poor educational level,  
15 disadvantaged socioeconomic status, and low annual income, which may be linked to  
16 poor living conditions, malnutrition, and non-access to basic health care. In addition,  
17 farmers working in the fields may have more exposure to ambient temperatures,  
18 because farming is basically highly related to weather.[51]  
19

20  
21 A study of 9 cities in California found that with each 10°F (4.7°C) increase in  
22 mean temperature, the mortality was increased 4.9%, 2.5%, and 1.8% for Blacks,  
23 Whites, and Hispanics, respectively.[29] Also, our previous research demonstrated  
24 less risk of high DTR associated with non-accidental mortality for the current day for  
25 people of Dai ethnic minority than Han nationality.[13] To our knowledge, no study  
26 has estimated the potential effect modification of mortality burden attributable to  
27 ambient temperatures by ethnicity. We observed a greater cold- and mild cold-related  
28 death for ethnic minorities than Han nationality in Yuxi, which indicated that  
29 race/ethnicity may modify the cold-associated mortality burden. We also found lower  
30 death burden caused by cold and extreme cold for married people versus those never  
31 married, divorced, or widowed, possibly because married people can be cared for by  
32 their partners during the cold period.  
33  
34  
35  
36  
37  
38  
39  
40  
41  
42  
43  
44  
45  
46

## 47 **5. Conclusions**

48  
49 Our present study revealed the non-accidental mortality burden clearly associated  
50 with ambient temperatures in Yuxi, China. A substantial burden of the deaths was due  
51 to cold, with the burden due to heat much lower. Mortality was increased with  
52 exposure to extreme cold, which was responsible for about one-quarter of the total  
53 mortality burden. In addition, the cold-related mortality burden was greater with  
54  
55  
56  
57  
58  
59  
60

1  
2  
3 cardiovascular than respiratory disease deaths and for people over 75 years old,  
4 females, farmers, ethnic minorities, and non-married individuals than their  
5 corresponding categories. The cold-related mortality burden in Yuxi may have  
6 important implications for public-health interventions to minimize the health effects  
7 due to adverse temperatures and for predicting the climate-change impact.  
8  
9  
10

## 11 12 **Declarations**

13  
14 **Contributors:** Q.Y.Z., Z.D., and C.Y.D. conceived and designed the experiments.  
15 L.J.L. and Y.F.W. provide primary data. P.G., S.Y.Y., J.L., Y.W., and C.Y.D.  
16 collected and cleaned the data. C.Y.D. analyzed the data and drafted the manuscript.  
17 Q.Y.Z., Z.D., and C.Y.D. revised the manuscript and interpreted the results. All  
18 authors read and approved the final manuscript.  
19  
20  
21  
22  
23

24 **Funding:** This study was supported by the Department of Education, Guangdong  
25 Government under the Top-tier University Development Scheme for Research and  
26 Control of Infectious Diseases (2016016), the National Natural Science Foundation of  
27 China (No. 81703323), National key R&D program of China (2016YFC1304000),  
28 and the Scientific Research Program of Health Bureau of Yuxi City (2014).  
29  
30  
31  
32  
33

34 **Competing interests:** The authors declare no competing financial interests.  
35  
36  
37

38 **Data sharing statement:** Please contact the corresponding author for data requests.  
39  
40  
41  
42  
43  
44  
45  
46  
47  
48  
49  
50  
51  
52  
53  
54  
55  
56  
57  
58  
59  
60



## References:

1. Watts N, Adger WN, Agnolucci P, Blackstock J, Byass P, et al. (2015) Health and climate change: policy responses to protect public health. *Lancet* 386: 1861-1914.
2. Lee JY, Kim H (2016) Projection of future temperature-related mortality due to climate and demographic changes. *Environ Int* 94: 489-494.
3. Zhan Z, Zhao Y, Pang S, Zhong X, Wu C, et al. (2017) Temperature change between neighboring days and mortality in United States: A nationwide study. *Science of the Total Environment* 584.
4. Song X, Wang S, Hu Y, Yue M, Zhang T, et al. (2017) Impact of ambient temperature on morbidity and mortality: An overview of reviews. *Sci Total Environ* 586: 241-254.
5. Gasparrini A, Guo Y, Hashizume M, Lavigne E, Zanobetti A, et al. (2015) Mortality risk attributable to high and low ambient temperature: a multicountry observational study. *Lancet* 386: 369-375.
6. Ryti NR, Guo Y, Jaakkola JJ (2016) Global Association of Cold Spells and Adverse Health Effects: A Systematic Review and Meta-Analysis. *Environ Health Perspect* 124: 12-22.
7. Guo Y, Gasparrini A, Armstrong BG, Tawatsupa B, Tobias A, et al. (2017) Heat Wave and Mortality: A Multicountry, Multicommunity Study. *Environ Health Perspect* 125: 087006.
8. Hajat S, Armstrong B, Baccini M, Biggeri A, Bisanti L, et al. (2006) Impact of high temperatures on mortality: is there an added heat wave effect? *Epidemiology* 17: 632-638.
9. Analitis A, Katsouyanni K, Biggeri A, Baccini M, Forsberg B, et al. (2008) Effects of cold weather on mortality: results from 15 European cities within the PHEWE project. *Am J Epidemiol* 168: 1397-1408.
10. Cui Y, Yin F, Deng Y, Volinn E, Chen F, et al. (2016) Heat or Cold: Which One Exerts Greater Deleterious Effects on Health in a Basin Climate City? Impact of Ambient Temperature on Mortality in Chengdu, China. *Int J Environ Res Public Health* 13.
11. Tian L, Qiu H, Sun S, Lin H (2016) Emergency Cardiovascular Hospitalizations Risk Attributable to Cold Temperatures in Hong Kong. *Circulation Cardiovascular Quality & Outcomes* 9: CIRCOUTCOMES.115.002410.
12. Ma W, Wang L, Lin H, Liu T, Zhang Y, et al. (2015) The temperature-mortality relationship in China: An analysis from 66 Chinese communities. *Environ Res* 137: 72-77.
13. Ding Z, Li L, Xin L, Pi F, Dong W, et al. (2016) High diurnal temperature range and mortality: Effect modification by individual characteristics and mortality causes in a case-only analysis. *Sci Total Environ* 544: 627-634.
14. Zanobetti A, O'Neill MS, Gronlund CJ, Schwartz JD (2013) Susceptibility to mortality in weather extremes: effect modification by personal and small-area characteristics. *Epidemiology* 24: 809-819.
15. Basagana X, Sartini C, Barrera-Gomez J, Dadvand P, Cunillera J, et al. (2011) Heat waves and cause-specific mortality at all ages. *Epidemiology* 22: 765-772.
16. Gasparrini A, Guo Y, Hashizume M, Lavigne E, Zanobetti A, et al. (2015) Mortality risk attributable to high and low ambient temperature: a multicountry observational study. *The Lancet* 386: 369-375.

17. Steenland K, Armstrong B (2006) An Overview of Methods for Calculating the Burden of Disease Due to Specific Risk Factors. *Epidemiology* 17: 512.
18. Gasparrini A, Leone M (2014) Attributable risk from distributed lag models. *BMC Med Res Methodol* 14: 55.
19. Lee WH, Lim YH, Dang TN, Seposo X, Honda Y, et al. (2017) An Investigation on Attributes of Ambient Temperature and Diurnal Temperature Range on Mortality in Five East-Asian Countries. *Sci Rep* 7: 10207.
20. Yang J, Zhou M, Ou CQ, Yin P, Li M, et al. (2017) Seasonal variations of temperature-related mortality burden from cardiovascular disease and myocardial infarction in China. *Environ Pollut* 224: 400-406.
21. Chung Y, Lim YH, Honda Y, Guo YL, Hashizume M, et al. (2015) Mortality related to extreme temperature for 15 cities in northeast Asia. *Epidemiology* 26: 255-262.
22. Guo Y, Gasparrini A, Armstrong B, Li S, Tawatsupa B, et al. (2014) Global variation in the effects of ambient temperature on mortality: a systematic evaluation. *Epidemiology* 25: 781-789.
23. Yang J, Yin P, Zhou M, Ou CQ, Li M, et al. (2016) The burden of stroke mortality attributable to cold and hot ambient temperatures: Epidemiological evidence from China. *Environ Int* 92-93: 232-238.
24. Wang C, Zhang Z, Zhou M, Zhang L, Yin P, et al. (2017) Nonlinear relationship between extreme temperature and mortality in different temperature zones: A systematic study of 122 communities across the mainland of China. *Science of the Total Environment* 586: 96-106.
25. Yang J, Yin P, Zhou M, Ou CQ, Guo Y, et al. (2015) Cardiovascular mortality risk attributable to ambient temperature in China. *Heart* 101: 1966-1972.
26. Group TE (1997) Cold exposure and winter mortality from ischaemic heart disease, cerebrovascular disease, respiratory disease, and all causes in warm and cold regions of Europe. The Eurowinter Group. *Lancet* 349: 1341-1346.
27. Diaz J, Carmona R, Miron IJ, Ortiz C, Linares C (2015) Comparison of the effects of extreme temperatures on daily mortality in Madrid (Spain), by age group: The need for a cold wave prevention plan. *Environ Res* 143: 186-191.
28. Ding Z, Guo P, Xie F, Chu H, Li K, et al. (2015) Impact of diurnal temperature range on mortality in a high plateau area in southwest China: A time series analysis. *Sci Total Environ* 526: 358-365.
29. Basu R, Ostro BD (2008) A multicounty analysis identifying the populations vulnerable to mortality associated with high ambient temperature in California. *Am J Epidemiol* 168: 632-637.
30. Moghadamnia MT, Ardalan A, Mesdaghinia A, Keshtkar A, Naddafi K, et al. (2017) Ambient temperature and cardiovascular mortality: a systematic review and meta-analysis. *PeerJ* 5: e3574.
31. Guo P, Zheng M, Feng W, Wu J, Deng C, et al. (2017) Effects of ambient temperature on stroke hospital admissions: Results from a time-series analysis of 104,432 strokes in Guangzhou, China. *Sci Total Environ* 580: 307-315.
32. Ding Z, Li L, Wei R, Dong W, Guo P, et al. (2016) Association of cold temperature and mortality and effect modification in the subtropical plateau monsoon climate of Yuxi, China. *Environ Res* 150: 431-437.
33. Onozuka D, Hagihara A (2017) Out-of-hospital cardiac arrest risk attributable to temperature in Japan. *Sci Rep* 7: 39538.
34. Wang X, Li G, Liu L, Westerdahl D, Jin X, et al. (2015) Effects of Extreme Temperatures on Cause-Specific Cardiovascular Mortality in China. *Int J Environ Res Public Health* 12: 16136-16156.



- 1
- 2
- 3 35. Yan C, Fei Y, Ying D, Volinn E, Fei C, et al. (2016) Heat or Cold: Which One
- 4 Exerts Greater Deleterious Effects on Health in a Basin Climate City? Impact
- 5 of Ambient Temperature on Mortality in Chengdu, China. *International*
- 6 *Journal of Environmental Research & Public Health* 13: 1225.
- 7 36. Carson C, Hajat S, Armstrong B, Wilkinson P (2006) Declining vulnerability to
- 8 temperature-related mortality in London over the 20th century. *Am J*
- 9 *Epidemiol* 164: 77-84.
- 10 37. Breitner S, Wolf K, Peters A, Schneider A (2014) Short-term effects of air
- 11 temperature on cause-specific cardiovascular mortality in Bavaria, Germany.
- 12 *Heart* 100: 1272-1280.
- 13 38. Braga AL, Zanobetti A, Schwartz J (2002) The effect of weather on respiratory
- 14 and cardiovascular deaths in 12 U.S. cities. *Environ Health Perspect* 110: 859-
- 15 863.
- 16 39. Medina-Ramon M, Zanobetti A, Cavanagh DP, Schwartz J (2006) Extreme
- 17 temperatures and mortality: assessing effect modification by personal
- 18 characteristics and specific cause of death in a multi-city case-only analysis.
- 19 *Environ Health Perspect* 114: 1331-1336.
- 20 40. Westfall TC, Yang CL, Chen X, Naes L, Vickery L, et al. (2005) A novel
- 21 mechanism prevents the development of hypertension during chronic cold
- 22 stress. *Auton Autacoid Pharmacol* 25: 171-177.
- 23 41. Luo B, Shi H, Wang L, Shi Y, Wang C, et al. (2014) Rat lung response to PM2.5
- 24 exposure under different cold stresses. *Int J Environ Res Public Health* 11:
- 25 12915-12926.
- 26 42. Tuo B, Li C, Peng L, Ye M, Liu W, et al. (2014) Analysis of differentially expressed
- 27 genes in cold-exposed mice to investigate the potential causes of cold-
- 28 induced hypertension. *Exp Ther Med* 8: 110-114.
- 29 43. Zhang Y, Li C, Feng R, Zhu Y, Kai W, et al. (2016) The Short-Term Effect of
- 30 Ambient Temperature on Mortality in Wuhan, China: A Time-Series Study
- 31 Using a Distributed Lag Non-Linear Model. *International Journal of*
- 32 *Environmental Research & Public Health* 13: 722-734.
- 33 44. Gasparrini A, Armstrong B, Kovats S, Wilkinson P (2012) The effect of high
- 34 temperatures on cause-specific mortality in England and Wales. *Occup*
- 35 *Environ Med* 69: 56-61.
- 36 45. Rocklöv J, Ebi K, Forsberg B (2011) Mortality Related to Temperature and
- 37 Persistent Extreme Temperatures-A Study of Cause-Specific and Age
- 38 Stratified Mortality. *Occupational & Environmental Medicine* 68: 531.
- 39 46. Analitis A, Katsouyanni K, Biggeri A, Baccini M, Forsberg B, et al. (2008) Effects
- 40 of cold weather on mortality: results from 15 European cities within the
- 41 PHEWE project. *American Journal of Epidemiology* 168: 1397-1408.
- 42 47. Gasparrini A, Armstrong B, Kovats S, Wilkinson P (2012) The effect of high
- 43 temperatures on cause-specific mortality in England and Wales. *Occupational*
- 44 *& Environmental Medicine* 69: 56.
- 45 48. Seposo XT, Dang TN, Honda Y (2015) Evaluating the Effects of Temperature on
- 46 Mortality in Manila City (Philippines) from 2006-2010 Using a Distributed Lag
- 47 Nonlinear Model. *International Journal of Environmental Research & Public*
- 48 *Health* 12: 6842-6857.
- 49 49. Xuan LTT, Egondi T, Ngoan LT, Toan DTT, Huong LT (2014) Seasonality in
- 50 mortality and its relationship to temperature among the older population in
- 51 Hanoi, Vietnam. *Global Health Action* 7: 23115.
- 52 50. Xiang J, Bi P, Pisaniello D, Hansen A (2014) The impact of heatwaves on workers'
- 53 health and safety in Adelaide, South Australia. *Environ Res* 133: 90-95.
- 54
- 55
- 56
- 57
- 58
- 59
- 60

- 1  
2  
3 51. Mutekwa VT (2009) Climate change impacts and adaptation in the agricultural  
4 sector: the case of smallholder farmers in Zimbabwe. Journal of Sustainable  
5 Development in Africa 11.  
6  
7  
8  
9  
10  
11  
12  
13  
14  
15  
16  
17  
18  
19  
20  
21  
22  
23  
24  
25  
26  
27  
28  
29  
30  
31  
32  
33  
34  
35  
36  
37  
38  
39  
40  
41  
42  
43  
44  
45  
46  
47  
48  
49  
50  
51  
52  
53  
54  
55  
56  
57  
58  
59  
60

For peer review only

**Table 1.** Daily total non-accidental mortality and by specific causes and individual characteristics in Yuxi, China, 2009–2016.

|                      | Total deaths | Min | Median (25 <sup>th</sup> , 75 <sup>th</sup> ) | Max | Mean (SD)  |
|----------------------|--------------|-----|-----------------------------------------------|-----|------------|
| Total non-accidental | 89,467       | 12  | 32 (28, 38)                                   | 72  | 33.0 (7.8) |
| Cause-specific       |              |     |                                               |     |            |
| Cardiovascular       | 41,794       | 2   | 15 (12, 18)                                   | 37  | 15.4 (4.9) |
| Heart                | 17,793       | 0   | 6 (4, 8)                                      | 22  | 6.6 (3.0)  |
| Stroke               | 22,589       | 0   | 8 (6, 10)                                     | 22  | 8.3 (3.3)  |
| Respiratory          | 16,565       | 0   | 6 (4, 8)                                      | 21  | 6.1 (3.1)  |
| Age, years           |              |     |                                               |     |            |
| ≤64                  | 21,678       | 1   | 8 (6, 10)                                     | 19  | 8.0 (2.9)  |
| 65–74                | 20,072       | 0   | 7 (5, 9)                                      | 19  | 7.4 (2.9)  |
| ≥75                  | 47,717       | 4   | 17 (14, 21)                                   | 43  | 17.6 (5.6) |
| Gender               |              |     |                                               |     |            |
| Male                 | 48,939       | 5   | 18 (14, 21)                                   | 43  | 18.1 (5.2) |
| Female               | 40,528       | 2   | 15 (12, 18)                                   | 36  | 15.0 (4.5) |
| Occupation           |              |     |                                               |     |            |
| Farmer               | 68,278       | 0   | 7 (5, 10)                                     | 33  | 7.8 (3.4)  |
| Non-farmer           | 21,189       | 7   | 25 (20, 30)                                   | 57  | 25.2 (7.0) |
| Ethnic               |              |     |                                               |     |            |
| Han nationality      | 63,275       | 6   | 23 (19, 27)                                   | 54  | 23.4 (6.4) |
| Ethnic minorities    | 26,192       | 0   | 9 (7, 12)                                     | 24  | 9.7 (3.6)  |
| Marital status       |              |     |                                               |     |            |
| Married              | 54,971       | 1   | 12 (10, 15)                                   | 32  | 12.7 (4.3) |
| Non-married          | 34,496       | 4   | 20 (16, 24)                                   | 49  | 20.3 (5.5) |

Min, minimum; Max maximum; 25<sup>th</sup>, 25<sup>th</sup> percentile of the distributions; 75<sup>th</sup>, 75<sup>th</sup> percentile of the distributions.

**Table 2.** Attributable fraction (%) of total non-accidental mortality and by specific causes and individual characteristics due to mean daily temperature and cold and heat over lag 0–28 days in Yuxi, China.

|                      | Total (%)                 | Cold (%)                  | Heat (%)            |
|----------------------|---------------------------|---------------------------|---------------------|
| Total non-accidental | <b>4.75 (2.33, 6.79)</b>  | <b>4.08 (0.86, 7.12)</b>  | 0.67 (-2.44, 3.64)  |
| Cause-specific       |                           |                           |                     |
| Cardiovascular       | <b>5.97 (2.74, 8.74)</b>  | <b>6.18 (1.89, 10.31)</b> | -0.21 (-5.04, 4.33) |
| Heart                | 5.25 (-0.40, 9.57)        | 6.48 (-0.70, 12.47)       | -1.23 (-8.59, 5.46) |
| Stroke               | <b>6.50 (2.22, 10.16)</b> | 6.01 (-0.11, 11.41)       | 0.49 (-6.18, 6.15)  |
| Respiratory          | 5.42 (-0.73, 9.71)        | 3.50 (-5.05, 10.95)       | 1.93 (-5.08, 7.90)  |
| Age, years           |                           |                           |                     |
| ≤64                  | 1.83 (-3.15, 5.95)        | 1.75 (-4.64, 7.10)        | 0.08 (-6.64, 5.64)  |
| 65–74                | 2.27 (-2.45, 6.30)        | 3.52 (-3.45, 9.37)        | -1.25 (-7.4, 5.01)  |
| ≥75                  | <b>6.87 (3.68, 9.46)</b>  | <b>5.34 (0.44, 9.38)</b>  | 1.53 (-2.96, 5.09)  |
| Gender               |                           |                           |                     |
| Male                 | <b>4.16 (0.82, 7.04)</b>  | 3.67 (-0.50, 7.72)        | 0.49 (-3.82, 4.31)  |
| Female               | <b>5.54 (2.18, 8.31)</b>  | <b>4.66 (0.03, 9.07)</b>  | 0.89 (-3.21, 5.03)  |
| Occupation           |                           |                           |                     |
| Farmer               | <b>5.66 (3.09, 7.92)</b>  | <b>4.93 (1.28, 8.37)</b>  | 0.73 (-2.7, 3.87)   |
| Non-farmer           | 1.75 (-3.58, 6.11)        | 1.24 (-5.77, 7.61)        | 0.52 (-6.82, 6.55)  |
| Ethnic               |                           |                           |                     |
| Han nationality      | <b>5.38 (2.44, 7.96)</b>  | 2.79 (-1.30, 6.49)        | 2.59 (-0.92, 5.80)  |
| Ethnic minorities    | 2.31 (-1.57, 6.76)        | <b>6.55 (1.15, 11.75)</b> | -4.24 (-10.8, 1.27) |
| Marital status       |                           |                           |                     |
| Married              | <b>4.24 (1.17, 6.99)</b>  | 2.74 (-1.87, 6.53)        | 1.50 (-2.67, 4.83)  |
| Non-married          | <b>5.48 (1.69, 8.56)</b>  | <b>6.10 (1.23, 10.21)</b> | -0.61 (-5.55, 3.95) |

Results are expressed as attributable fractions (95% empirical confidence intervals), and the bold indicates a statistically significant.

**Table 3.** Mortality fraction (%) attributable to extreme and mild cold and mild and extreme heat by specific causes and individual characteristics.

|                      | Extreme cold (%)         | Mild cold (%)            | Mild heat (%)       | Extreme heat (%)    |
|----------------------|--------------------------|--------------------------|---------------------|---------------------|
| Total non-accidental | <b>1.17 (0.58, 1.69)</b> | 3.06 (-0.08, 5.94)       | 0.57 (-2.36, 3.28)  | 0.12 (-0.26, 0.45)  |
| Cause-specific       |                          |                          |                     |                     |
| Cardiovascular       | <b>1.57 (0.81, 2.36)</b> | <b>4.88 (0.55, 8.60)</b> | -0.24 (-4.55, 3.40) | 0.03 (-0.50, 0.51)  |
| Heart                | <b>1.49 (0.23, 2.58)</b> | 5.25 (-1.37, 10.84)      | -1.17 (-7.78, 4.53) | -0.08 (-0.87, 0.64) |
| Stroke               | <b>1.63 (0.60, 2.65)</b> | 4.65 (-1.05, 9.49)       | 0.38 (-5.22, 5.28)  | 0.13 (-0.59, 0.78)  |
| Respiratory          | 1.35 (-0.15, 2.72)       | 2.28 (-5.64, 9.11)       | 1.70 (-4.01, 6.68)  | 0.26 (-0.48, 0.91)  |
| Age, years           |                          |                          |                     |                     |
| ≤64                  | 0.44 (-0.63, 1.43)       | 1.34 (-4.52, 6.30)       | 0.06 (-5.58, 5.56)  | 0.02 (-0.70, 0.72)  |
| 65–74                | 0.68 (-0.37, 1.72)       | 2.91 (-3.72, 8.51)       | -1.14 (-7.03, 4.22) | -0.12 (-0.83, 0.61) |
| ≥75                  | <b>1.71 (0.91, 2.48)</b> | 3.89 (-0.36, 7.66)       | 1.32 (-2.38, 4.64)  | 0.24 (-0.22, 0.68)  |
| Gender               |                          |                          |                     |                     |
| Male                 | <b>1.02 (0.28, 1.74)</b> | 2.76 (-1.08, 6.27)       | 0.41 (-3.25, 3.87)  | 0.09 (-0.40, 0.53)  |
| Female               | <b>1.36 (0.55, 2.15)</b> | 3.48 (-0.77, 7.36)       | 0.76 (-3.26, 4.20)  | 0.15 (-0.37, 0.62)  |
| Occupation           |                          |                          |                     |                     |
| Farmer               | <b>1.42 (0.82, 2.04)</b> | <b>3.71 (0.38, 6.70)</b> | 0.61 (-2.47, 3.39)  | 0.13 (-0.27, 0.52)  |
| Non-farmer           | 0.39 (-0.73, 1.41)       | 0.84 (-5.98, 6.43)       | 0.45 (-6.15, 5.95)  | 0.07 (-0.65, 0.74)  |
| Ethnic               |                          |                          |                     |                     |
| Han nationality      | <b>1.22 (0.54, 1.91)</b> | 1.69 (-2.20, 5.31)       | 2.30 (-0.73, 5.42)  | 0.34 (-0.06, 0.76)  |
| Ethnic minorities    | <b>1.03 (0.07, 1.93)</b> | <b>5.71 (0.91, 9.74)</b> | -3.84 (-9.8, 1.12)  | -0.43 (-1.12, 0.25) |
| Marital status       |                          |                          |                     |                     |
| Married              | <b>0.98 (0.26, 1.66)</b> | 1.86 (-2.06, 5.17)       | 1.32 (-2.17, 4.62)  | 0.21 (-0.24, 0.61)  |
| Non-married          | <b>1.47 (0.59, 2.25)</b> | <b>4.88 (0.19, 9.18)</b> | -0.60 (-5.16, 3.37) | -0.02 (-0.58, 0.50) |

Results are expressed as attributable fractions (95% empirical confidence intervals), and the bold indicates a statistically significant.

## Figure Legends

**Figure 1.** Time series of daily number of non-accidental deaths of Yuxi and mean temperature, 2009–2016.

**Figure 2.** Overall cumulative relative risk (with 95% empirical confidence intervals, shaded grey) at a lag of 0–28 days in Yuxi, China, with histogram of daily temperature distribution. The dotted lines are the median of the mean temperature, and the dashed lines are the 2.5th and 97.5th percentiles of the distribution of mean temperature. The lines before and after the dotted lines represent the exposure response below (blue lines) and above (red lines) the median of mean temperature.

**Figure 3.** Daily number of total non-accidental deaths attributable to cold (blue points) and heat (red points).

1  
2  
3  
4  
5  
6  
7  
8  
9  
10  
11  
12  
13  
14  
15  
16  
17  
18  
19  
20  
21  
22  
23  
24  
25  
26  
27  
28  
29  
30  
31  
32  
33  
34  
35  
36  
37  
38  
39  
40  
41  
42  
43  
44  
45  
46  
47  
48  
49  
50  
51  
52  
53  
54  
55  
56  
57  
58  
59  
60

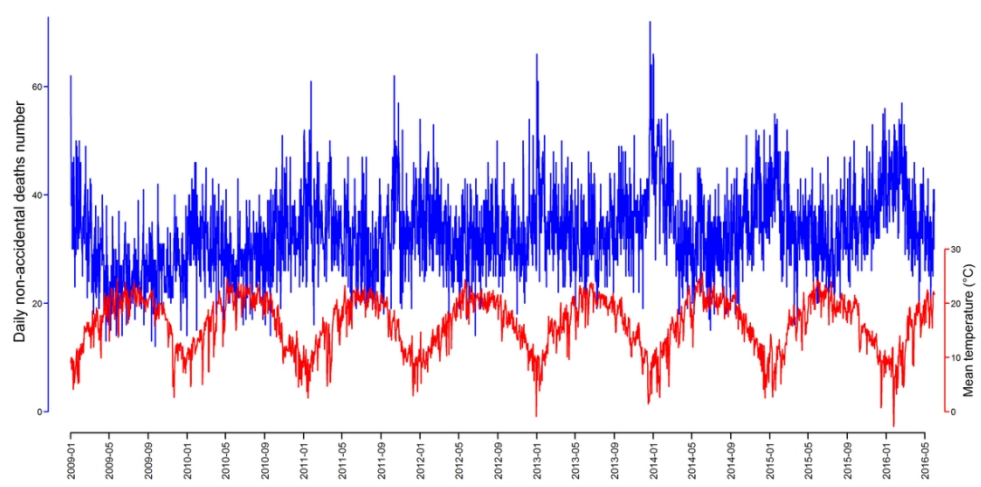

Time series of daily number of non-accidental deaths of Yuxi and mean temperature, 2009–2016

105x52mm (300 x 300 DPI)

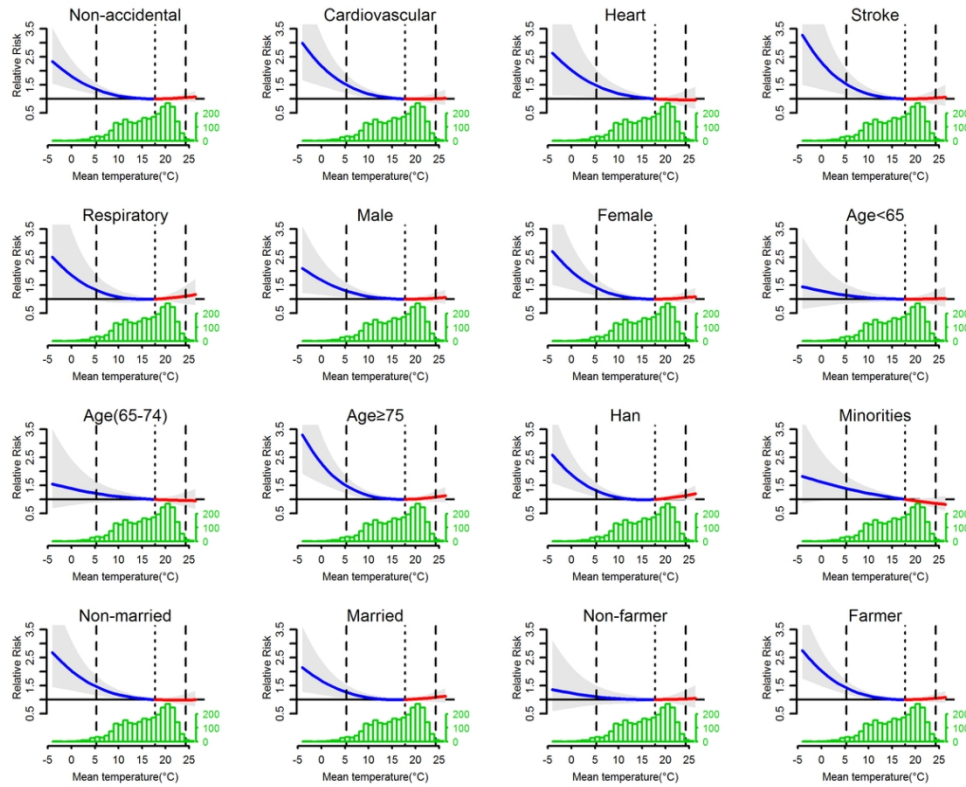

Overall cumulative relative risk (with 95% empirical confidence intervals, shaded grey) at a lag of 0–28 days in Yuxi, China, with histogram of daily temperature distribution. The dotted lines are the median of the mean temperature, and the dashed lines are the 2.5th and 97.5th percentiles of the distribution of mean temperature. The lines before and after the dotted lines represent the exposure response below (blue lines) and above (red lines) the median of mean temperature

101x81mm (300 x 300 DPI)



1  
2  
3  
4  
5  
6  
7  
8  
9  
10  
11  
12  
13  
14  
15  
16  
17  
18  
19  
20  
21  
22  
23  
24  
25  
26  
27  
28  
29  
30  
31  
32  
33  
34  
35  
36  
37  
38  
39  
40  
41  
42  
43  
44  
45  
46  
47  
48  
49  
50  
51  
52  
53  
54  
55  
56  
57  
58  
59  
60

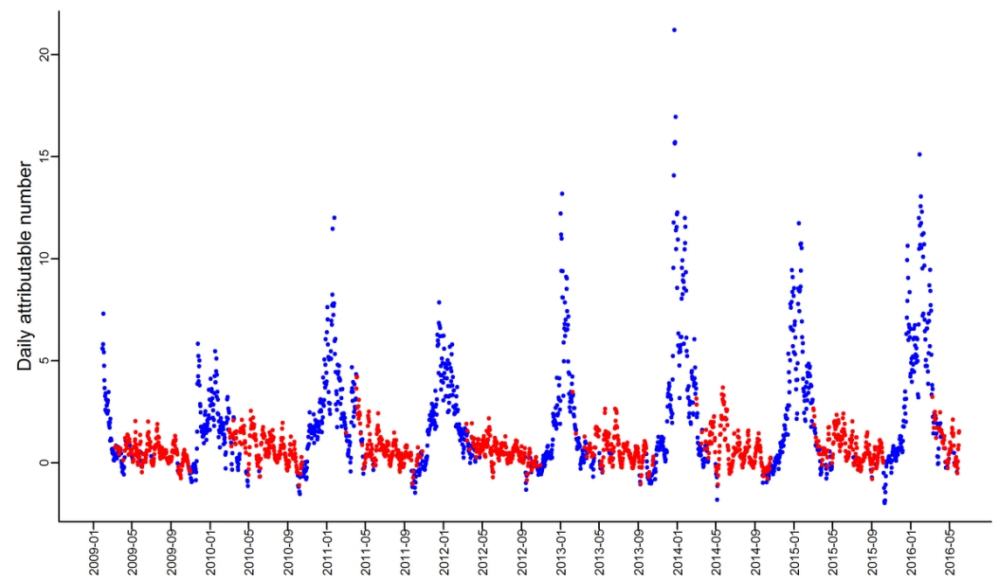

Daily number of total non-accidental deaths attributable to cold (blue points) and heat (red points)  
101x60mm (300 x 300 DPI)

## Supplemental materials

**Table S1.** Descriptive statistics for weather conditions, 2009–2016.

|                            | Min   | 25 <sup>th</sup> | Median | 75 <sup>th</sup> | Max   | Mean (SD) |
|----------------------------|-------|------------------|--------|------------------|-------|-----------|
| Mean temperature ( °C)     | -3.3  | 12.3             | 17.0   | 20.2             | 25.6  | 16.1±4.9  |
| Relative humidity (%)      | 25.0  | 58.0             | 71.0   | 78.0             | 95.0  | 67.3±14.7 |
| Atmospheric pressure (hPa) | 802.7 | 807.9            | 810.1  | 812.5            | 822.2 | 810.3±3.2 |
| Wind speed (m/s)           | 0.5   | 1.9              | 2.5    | 3.2              | 8.6   | 2.7±1.1   |
| Sunshine duration (h)      | 0     | 3.1              | 7.6    | 9.9              | 12.9  | 6.5±3.9   |

**Table S2.** Attributable number of non-accidental deaths and specific categories due to daily mean temperature, computed as total and as separated components for cold and heat temperatures over lag 0–28 days in Yuxi, China.

|                      | Total                    | Cold                    | Heat               |
|----------------------|--------------------------|-------------------------|--------------------|
| Total non-accidental | <b>4131 (2306, 5937)</b> | <b>3482 (552, 5980)</b> | 652 (-2049, 3185)  |
| Cause-specific       |                          |                         |                    |
| Cardiovascular       | <b>2419 (2622, 7476)</b> | <b>2489 (629, 4141)</b> | -68 (-2019, 1701)  |
| Heart                | <b>912 (446, 8413)</b>   | 1112 (-98, 2200)        | -199 (-1456, 918)  |
| Stroke               | <b>1417 (2055, 8814)</b> | <b>1306 (104, 2634)</b> | 113 (-1178, 1283)  |
| Respiratory          | 854 (-428, 8228)         | 540 (-846, 1689)        | 314 (-822, 1190)   |
| Age, years           |                          |                         |                    |
| ≤64                  | 414 (-2421, 5413)        | 359 (-976, 1580)        | 55 (-1384, 1237)   |
| 65-74                | 470 (-2366, 5715)        | 679 (-764, 1853)        | -209 (-1543, 953)  |
| ≥75                  | <b>3137 (3094, 7816)</b> | <b>2431 (102, 4392)</b> | 710 (-1135, 2532)  |
| Gender               |                          |                         |                    |
| Male                 | <b>1977 (818, 5961)</b>  | 1706 (-395, 3697)       | 273 (-1668, 2048)  |
| Female               | <b>2181 (1691, 7074)</b> | 1802 (-59, 3390)        | 380 (-1355, 1919)  |
| Occupation           |                          |                         |                    |
| Farmer               | <b>3752 (2730, 6784)</b> | <b>3225 (801, 5403)</b> | 530 (-1799, 2580)  |
| Non-farmer           | 364 (-2842, 5120)        | 242 (-1320, 1486)       | 124 (-1293, 1350)  |
| Ethnic               |                          |                         |                    |
| Han nationality      | <b>3243 (2237, 6688)</b> | 1624 (-972, 4023)       | 1618 (-622, 3621)  |
| Ethnic minorities    | 649 (-1165, 5773)        | <b>1685 (332, 2934)</b> | -1037 (-2677, 488) |
| Marital status       |                          |                         |                    |
| Married              | <b>2262 (1118, 5804)</b> | 1402 (-833, 3564)       | 860 (-1201, 2875)  |
| Non-married          | <b>1843 (1892, 7386)</b> | <b>2042 (334, 3527)</b> | -197 (-1963, 1218) |

Results are expressed as attributable number (95% empirical confidence interval), and the bold indicates a statistically significant.

**Table S3.** Mortality number attributable to extreme and mild cold and mild and extreme heat by specific causes and individual characteristics

|                      | Extreme cold            | Mild cold               | Mild heat          | Extreme heat    |
|----------------------|-------------------------|-------------------------|--------------------|-----------------|
| Total non-accidental | <b>1054 (604, 1530)</b> | 2556 (-117, 5016)       | 554 (-1930, 2984)  | 108 (-199, 395) |
| Cause-specific       |                         |                         |                    |                 |
| Cardiovascular       | <b>657 (331, 946)</b>   | <b>1942 (183, 3532)</b> | -84 (-1803, 1505)  | 15 (-191, 217)  |
| Heart                | <b>264 (72, 445)</b>    | 892 (-146, 1896)        | -190 (-1385, 830)  | -13 (-154, 109) |
| Stroke               | <b>368 (136, 600)</b>   | 997 (-345, 2170)        | 87 (-1095, 1183)   | 28 (-129, 169)  |
| Respiratory          | 223 (-30, 434)          | 337 (-1005, 1413)       | 277 (-643, 1006)   | 42 (-89, 161)   |
| Age, years           |                         |                         |                    |                 |
| ≤64                  | 101 (-135, 308)         | 265 (-1039, 1292)       | 46 (-1121, 1094)   | 10 (-135, 149)  |
| 65-74                | 140 (-75, 331)          | 554 (-685, 1578)        | -192 (-1434, 971)  | -20 (-181, 116) |
| ≥75                  | <b>814 (431, 1152)</b>  | 1732 (-123, 3465)       | 612 (-1103, 2097)  | 110 (-99, 313)  |
| Gender               |                         |                         |                    |                 |
| Male                 | <b>503 (118, 851)</b>   | 1257 (-681, 3097)       | 229 (-1651, 1917)  | 47 (-153, 264)  |
| Female               | <b>556 (238, 882)</b>   | 1321 (-483, 2860)       | 325 (-1203, 1755)  | 61 (-134, 248)  |
| Occupation           |                         |                         |                    |                 |
| Farmer               | <b>977 (564, 1376)</b>  | <b>2382 (27, 4440)</b>  | 446 (-1638, 2333)  | 92 (-173, 349)  |
| Non-farmer           | 83 (-125, 295)          | 158 (-1263, 1389)       | 109 (-1137, 1255)  | 16 (-128, 158)  |
| Ethnic               |                         |                         |                    |                 |
| Han nationality      | <b>772 (364, 1191)</b>  | 918 (-1565, 3045)       | 1440 (-488, 3387)  | 209 (-57, 433)  |
| Ethnic minorities    | 274 (-1, 500)           | <b>1462 (162, 2576)</b> | -941 (-2416, 330)  | -104 (-277, 62) |
| Marital status       |                         |                         |                    |                 |
| Married              | <b>544 (165, 908)</b>   | 908 (-1292, 2815)       | 759 (-995, 2607)   | 117 (-125, 344) |
| Non-married          | <b>509 (219, 781)</b>   | <b>1615 (4, 3017)</b>   | -192 (-1730, 1143) | -7 (-198, 158)  |

Results are expressed as attributable number (95% empirical confidence interval), and the bold indicates a statistically significant.

**Table S4** Sensitivity analyses to calculate the fraction (%) with 95% empirical confidence interval attributable to temperature by changing maximum lag for mean temperature and degrees of freedom (*df*) for covariates

| Model choices               | Total             | Cold               | Heat                |
|-----------------------------|-------------------|--------------------|---------------------|
| Lag period, days            |                   |                    |                     |
| 7                           | 2.85 (1.62, 3.99) | 0.97 (-1.16, 2.98) | 1.88 (0.32, 3.31)   |
| 14                          | 4.15 (2.78, 5.52) | 2.90 (0.59, 5.15)  | 1.25 (-0.48, 2.93)  |
| 21                          | 3.57 (1.51, 5.31) | 3.10 (0.25, 5.76)  | 0.47 (-1.99, 2.89)  |
| Df for time per year        |                   |                    |                     |
| 5                           | 4.69 (3.10, 6.15) | 4.19 (1.18, 6.73)  | 0.51 (-1.66, 2.81)  |
| 6                           | 5.94 (4.07, 7.53) | 4.96 (2.18, 7.72)  | 0.98 (-1.68, 3.49)  |
| 8                           | 3.82 (0.92, 6.42) | 4.72 (1.23, 8.07)  | -0.90 (-4.31, 2.26) |
| 9                           | 5.07 (2.15, 7.75) | 4.59 (0.57, 8.16)  | 0.48 (-2.98, 3.75)  |
| Df for relative humidity    |                   |                    |                     |
| 2                           | 4.64 (2.21, 6.83) | 4.07 (0.84, 7.28)  | 0.57 (-2.70, 3.56)  |
| 4                           | 4.74 (2.31, 6.88) | 4.05 (0.56, 7.26)  | 0.69 (-2.15, 3.83)  |
| 5                           | 4.79 (2.55, 6.92) | 4.20 (1.06, 7.20)  | 0.60 (-2.76, 3.36)  |
| Df for sunshine duration    |                   |                    |                     |
| 2                           | 4.71 (2.27, 6.84) | 4.18 (0.88, 7.35)  | 0.54 (-2.89, 3.51)  |
| 4                           | 4.75 (2.39, 6.95) | 4.08 (0.92, 7.03)  | 0.67 (-2.51, 3.65)  |
| 5                           | 4.78 (2.44, 6.90) | 4.13 (0.69, 7.45)  | 0.65 (-2.40, 3.63)  |
| Df for atmospheric pressure |                   |                    |                     |
| 2                           | 4.76 (2.24, 6.87) | 4.15 (0.76, 7.00)  | 0.62 (-2.69, 3.49)  |
| 4                           | 4.75 (2.21, 6.97) | 4.09 (0.39, 6.95)  | 0.67 (-2.49, 3.76)  |
| 5                           | 4.79 (2.38, 6.95) | 4.02 (1.01, 7.08)  | 0.77 (-2.30, 3.98)  |
| Df for wind speed           |                   |                    |                     |
| 2                           | 4.79 (2.26, 6.90) | 4.02 (0.47, 6.88)  | 0.78 (-2.34, 3.52)  |
| 4                           | 4.68 (2.34, 6.78) | 4.02 (0.60, 7.07)  | 0.67 (-2.48, 3.68)  |
| 5                           | 4.66 (2.31, 6.85) | 4.04 (0.90, 6.94)  | 0.62 (-2.56, 3.75)  |

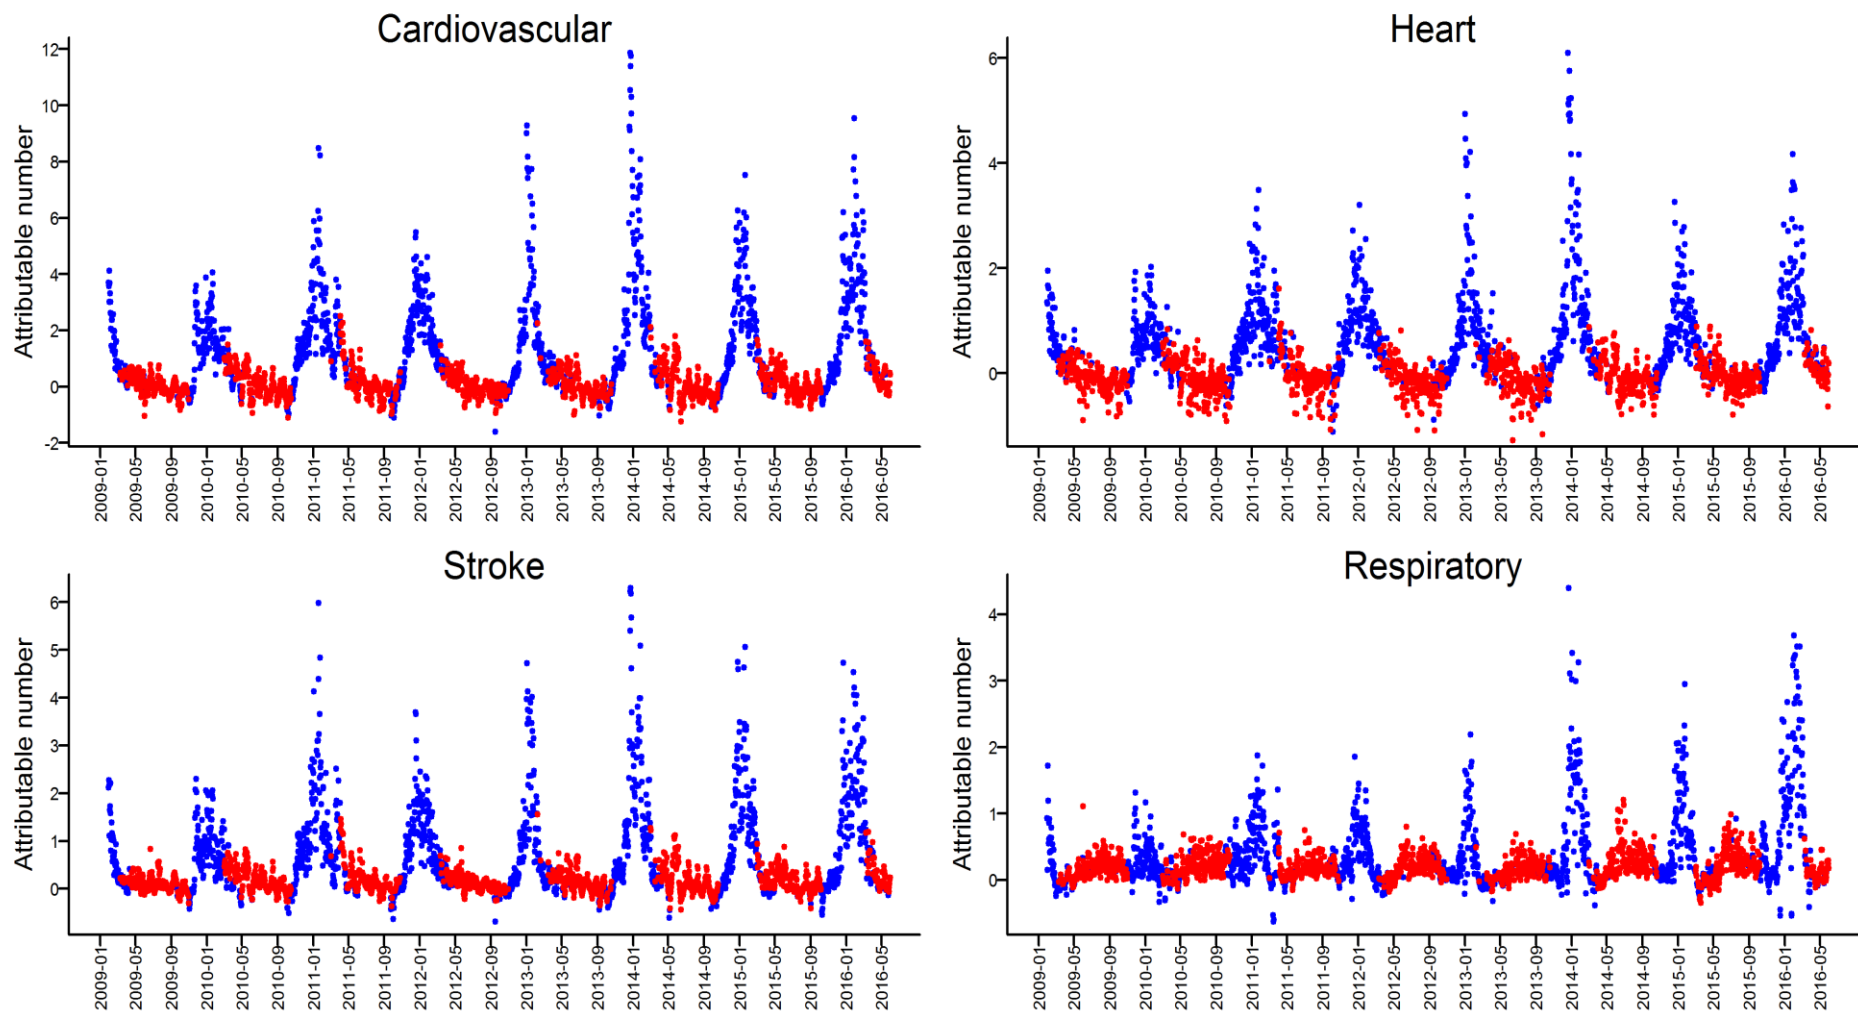

**Figure S1.** Daily number of cardiovascular, heart, stroke and respiratory deaths attributable to cold (blue points) and heat (red points) temperatures.

# BMJ Open

## Burden of non-accidental mortality attributable to ambient temperatures in a high plateau area of southwest China

|                                 |                                                                                                                                                                                                                                                                                                                                                                                                                                                                                                                                                                                                                                                                                                                                                                                                                                                                                                                                                                                        |
|---------------------------------|----------------------------------------------------------------------------------------------------------------------------------------------------------------------------------------------------------------------------------------------------------------------------------------------------------------------------------------------------------------------------------------------------------------------------------------------------------------------------------------------------------------------------------------------------------------------------------------------------------------------------------------------------------------------------------------------------------------------------------------------------------------------------------------------------------------------------------------------------------------------------------------------------------------------------------------------------------------------------------------|
| Journal:                        | <i>BMJ Open</i>                                                                                                                                                                                                                                                                                                                                                                                                                                                                                                                                                                                                                                                                                                                                                                                                                                                                                                                                                                        |
| Manuscript ID                   | bmjopen-2018-024708.R1                                                                                                                                                                                                                                                                                                                                                                                                                                                                                                                                                                                                                                                                                                                                                                                                                                                                                                                                                                 |
| Article Type:                   | Research                                                                                                                                                                                                                                                                                                                                                                                                                                                                                                                                                                                                                                                                                                                                                                                                                                                                                                                                                                               |
| Date Submitted by the Author:   | 20-Nov-2018                                                                                                                                                                                                                                                                                                                                                                                                                                                                                                                                                                                                                                                                                                                                                                                                                                                                                                                                                                            |
| Complete List of Authors:       | Deng, Changyu; Department of Preventive Medicine, Shantou University Medical College<br>Ding, Zan; The Institute of Metabolic Diseases, Baoan Central Hospital of Shenzhen, Shenzhen, Guangdong 518102, China<br>LI, Liujiu; Yuxi Center for Disease Control and Prevention, Yuxi, Yunnan 653000, China<br>Wang, Yanfang; Yuxi Center for Disease Control and Prevention, Yuxi, Yunnan 653000, China<br>Guo, Pi; Department of Preventive Medicine, Shantou University Medical College, Shantou, Guangdong 515041, China<br>Yang, Shaoyi; Department of Preventive Medicine, Shantou University Medical College, Shantou, Guangdong 515041, China<br>Liu, Ju; Department of Preventive Medicine, Shantou University Medical College, Shantou, Guangdong 515041, China<br>Wang, Yue; Department of Preventive Medicine, Shantou University Medical College, Shantou, Guangdong 515041, China<br>Zhang, qingying; Department of Preventive Medicine, Shantou University Medical College, |
| <b>Primary Subject Heading</b>: | Public health                                                                                                                                                                                                                                                                                                                                                                                                                                                                                                                                                                                                                                                                                                                                                                                                                                                                                                                                                                          |
| Secondary Subject Heading:      | Epidemiology                                                                                                                                                                                                                                                                                                                                                                                                                                                                                                                                                                                                                                                                                                                                                                                                                                                                                                                                                                           |
| Keywords:                       | ambient temperatures, attributable fraction, attributable number, mortality, effect modification                                                                                                                                                                                                                                                                                                                                                                                                                                                                                                                                                                                                                                                                                                                                                                                                                                                                                       |
|                                 |                                                                                                                                                                                                                                                                                                                                                                                                                                                                                                                                                                                                                                                                                                                                                                                                                                                                                                                                                                                        |

SCHOLARONE™  
Manuscripts

1  
2  
3  
4 **1 Burden of non-accidental mortality attributable to ambient**  
5  
6 **2 temperatures in a high plateau area of southwest China**  
7  
8  
9

10 4 Changyu Deng <sup>a,1</sup>, Zan Ding <sup>b,1</sup>, Liujiu Li <sup>c</sup>, Yanfang Wang <sup>c</sup>, Pi Guo <sup>a</sup>, Shaoyi Yang <sup>a</sup>,  
11 5 Ju Liu <sup>a</sup>, Yue Wang <sup>a</sup>, Qingying Zhang <sup>a,\*</sup>  
12

13 6  
14 7 <sup>a</sup> Department of Preventive Medicine, Shantou University Medical College, Shantou,  
15 8 Guangdong 515041, China  
16

17 9 <sup>b</sup> The Institute of Metabolic Diseases, Baoan Central Hospital of Shenzhen, Shenzhen,  
18 10 Guangdong 518102, China  
19

20 11 <sup>c</sup> Yuxi Center for Disease Control and Prevention, Yuxi, Yunnan 653000, China  
21

22 12  
23 13 <sup>1</sup> These authors contributed equally to this work (Changyu Deng, Zan Ding).  
24

25 14 \* Correspondence to: Department of Preventive Medicine, Shantou University  
26 15 Medical College, Shantou, Guangdong 515041, China. E-mail: qyzhang@stu.edu.cn  
27 16 (Q. Zhang).  
28  
29  
30  
31  
32  
33  
34  
35  
36  
37  
38  
39  
40  
41  
42  
43  
44  
45  
46  
47  
48  
49  
50  
51  
52  
53  
54  
55  
56  
57  
58  
59  
60

## 1 **Abstract**

2 *Objective:* To examine the total non-accidental mortality burden attributable to  
3 ambient temperatures and assess the effect modification of the burden by specific  
4 causes of death and individual characteristics in a high plateau area in southwest  
5 China.

6 *Methods:* Using daily mortality and meteorological data from 2009 to 2016, we  
7 applied a quasi-Poisson model combined with a distributed lag non-linear model to  
8 estimate the temperature–mortality association with the assessment of attributable  
9 fraction and number. We calculated attributable fractions and deaths with 95%  
10 empirical confidence intervals (eCIs), that were due to cold and heat, defined as  
11 temperatures below and above the median temperature, and for mild and extreme  
12 temperatures, defined by cutoffs at the 2.5th and 97.5th temperature percentiles.

13 *Results:* We analyzed 89,467 non-accidental deaths; 4,131 were attributable to overall  
14 temperatures, with an attributable fraction of 4.75% (95% eCI 2.33, 6.79). Most of the  
15 mortality burden was caused by cold (4.08%; 0.86, 7.12), while the burden due to heat  
16 was low and non-significant (0.67%; -2.44, 3.64). Extreme cold (1.17%; 0.58, 1.69)  
17 was responsible for 24.6% (i.e., 1.17% divided by 4.75%) of the total death burden. In  
18 the stratification analyses, attributable risk due to cold was higher for cardiovascular  
19 than respiratory disease (6.18% vs 3.50%). We found a trend of risk of increased  
20 death due to ambient temperatures with increasing age, with attributable fractions of  
21 1.83%, 2.27%, and 6.87% for age  $\leq 64$ , 65 – 74, and  $\geq 75$  years old. The cold-related  
22 burden was slightly greater for females, farmers, ethnic minorities, and non-married  
23 individuals than their corresponding categories.

24 *Conclusions:* Most of the burden of death was attributable to cold, and specific causes  
25 and individual characteristics might modify the mortality burden attributable to  
26 ambient temperatures. The results may help make prevention measures to confront  
27 climate change for susceptible population in this region.

28 *Key words:* ambient temperatures; attributable fraction; attributable number; mortality;  
29 effect modification

## 30 **Strengths and limitations of this study**

- 31 • Mortality burden attributable to ambient temperature was assessed in a high  
32 plateau city in southwest China.  
33



- 1 • To our knowledge, this study evaluated the mortality burden attributable to  
2 ambient temperature, and quantified its effect modification by national minority and  
3 occupation for the first time.
- 4 • The data only come from one city, so it should be cautious to generalize the  
5 findings to other geographic areas or climates.
- 6 • We used the data on temperature from monitoring sites rather than measuring  
7 individual exposure, which may bring about measurement errors.

## 9 1. Introduction

10 With the global climate change, ambient temperatures has been extensively  
11 demonstrated to directly affect human health (e.g., daily morbidity and mortality) and  
12 has become one of the most severe public health problems in the world.[1-5]  
13 Exposure to extreme weather such as cold spells and heat waves represents high risk  
14 for mortality, and the extreme temperature-related mortality is expected to increase  
15 with the increasing frequency, intensity, and duration of extreme weather events.[4,6-  
16 8] Low and high temperatures are also well known to be associated with a substantial  
17 increase in a wide range of all-cause and cause-specific mortality (e.g., cardiovascular  
18 and respiratory diseases).[6,9-12]

19 Numerous epidemiological studies have widely used ratio measures (e.g., odds  
20 ratio, relative ratio, or rate ratio) to quantify the relationships between ambient  
21 temperatures and human health, but these offer limited information on the excess  
22 burden and actual impact of ambient temperatures.[13-16] Relative excess measures  
23 (e.g., attributable fraction) and absolute excess measures (e.g., attributable number),  
24 calculated on the basis of the estimated relative risk, have been pointed out to provide  
25 better scientific evidence for estimating the potential benefits of preventative  
26 measures, public health interventions, and resource allocation.[11,17,18] The  
27 attributable fraction and number represent the fraction and number of cases or deaths  
28 from a cause-specific disease that would be prevented without exposure to a specific  
29 risk factor, which has important implications for policy making and the potential  
30 impact of interventions.[19-21]

31 Use of risk assessment of the attributable fraction revealed the burden of  
32 mortality associated with ambient temperatures; however, most previous literatures  
33 estimated the mortality burden in high-income or low-altitude regions or

1 coastlands,[11,17,20,22-24] and few were conducted in high plateau areas of  
2 developing countries.[12,25] The attributable fraction and number for the  
3 temperature–mortality association may vary by geographic features, climate, and  
4 structure of the population.[25,26] In addition, age, gender, educational attainment,  
5 and specific causes were previously identified as modifiers for estimating the effect  
6 modification of the mortality risk attributable to ambient temperatures.[27-31]  
7 However, few researchers have focused on the potential effect modification of the  
8 mortality burden by occupation, race/ethnicity, or marital status.[32]

9 Yuxi city is located in a high-altitude area in southwest China and experiences a  
10 unique, subtropical, plateau monsoon climate. More than 70% of indigenous people in  
11 this multi-ethnic region engage in agricultural production. The aim of this current  
12 ecological dissertation in Yuxi was to quantify the burden of non-accidental mortality  
13 attributable to ambient temperatures. We aimed to separate the contribution of  
14 temperature to mortality by heat and cold and mild and extreme temperatures by using  
15 attributable fraction and number, based on a proposed framework of attributable risk  
16 assessment within a distributed lag non-linear model (DLNM). A more in-depth  
17 purpose was to comprehensively assess the effect modification of the non-accidental  
18 mortality burden attributable to ambient temperatures by specific mortality causes (i.e.,  
19 cardiovascular, heart, stroke, and respiratory diseases) and individual characteristics  
20 (i.e., age, gender, occupation, ethnicity, and marital status).

## 22 **2. Methods**

### 23 **2.1 Study site**

24 Located on the western edge of the Yunnan-Guizhou Plateau of southwest China,  
25 the Yuxi city area has complicated geographic features of mountains, valleys, plateaus,  
26 and basins. With an average altitude of about 2000m and 4 spring-like seasons, this  
27 area has a unique, subtropical, plateau monsoon climate, showing diversified climates  
28 with low atmospheric pressure, thin and dry air, and a stable daily mean temperature  
29 but large temperature difference between day and night, morning or evening and  
30 daytime, indoor and outdoor. From the national population census in 2010, the  
31 permanent population is about 2.3 billion, and residents of ethnic minorities (e.g., Dai,  
32 Hui, Yi, Hani, and Mongolian minorities) account for 32.27% of the total population.

### 33 **2.2 Data collection**

1  
2  
3  
4  
5  
6  
7  
8  
9  
10  
11  
12  
13  
14  
15  
16  
17  
18  
19  
20  
21  
22  
23  
24  
25  
26  
27  
28  
29  
30  
31  
32  
33  
34  
35  
36  
37  
38  
39  
40  
41  
42  
43  
44  
45  
46  
47  
48  
49  
50  
51  
52  
53  
54  
55  
56  
57  
58  
59  
60

1 Individual records such as age of death, gender, ethnicity, occupation, marital  
2 status, cause of death, and date of death for all registered deaths for the period January  
3 1, 2009 to May 31, 2016, were obtained from the Yuxi Center for Disease Control and  
4 Prevention, which maintains detailed quality assurance and control measures[33,34].  
5 The underlying causes of death were classified by medical personnel, and  
6 examination procedures were routinely performed to ensure accurate data, based on  
7 the *International Classification of Diseases*, 10th revision (ICD-10). Individual data  
8 were collapsed into a series of daily counts for the total non-accidental mortality  
9 (ICD-10 A00–R99) as well as subcategories by specific cause of death  
10 (cardiovascular [I00–I99], heart [I00–I51], stroke [I60–I69], and respiratory disease  
11 [J00–J99]), age (0–64, 65–74, and 75+ years old), gender (male and female),  
12 occupation (farmer and non-farmer), ethnicity (Han nationality and ethnic minorities),  
13 and marital status (married and non-married). Daily meteorological data for the same  
14 period were obtained from the China Meteorological Data Sharing System, including  
15 mean temperature and 4 other meteorological variables (atmospheric pressure, wind  
16 speed, sunshine duration, and relative humidity).

### 17 18 **2.3 Patient and public involvement**

19 This study is based on daily death number data, which could be obtained from  
20 Yuxi Center for Disease Control and Prevention without referral and free of charge.  
21 There was no patient and decedent involvement in the presented study.

### 22 23 **2.4 Statistical analysis**

24 As daily death number under a Poisson distribution and risk of mortality depend  
25 on exposure to temperatures of the current and previous days,[25] we applied a  
26 standard time-series quasi-Poisson regression model combined with DLNM to  
27 estimate the non-linear and lag effects of mean temperature on mortality, with day of  
28 the week, long-term trends, and the 4 other meteorological variables as potential  
29 covariates. This model can capture the complex non-linear relation and lagged effect  
30 by combining 2 functions that define the conventional exposure–response association  
31 and the additional lag–response association. The maximum lag period was set to 28  
32 days to explore the lag structure of temperature effect, and median temperature  
33 (17.0°C) was the reference to calculate attributable risk.[32] We used natural cubic  
34 splines with 7 degrees of freedom (*df*) per year for time to describe the long-term

1 trends and seasonality and 3 *df* for the 4 other meteorological indicators. These model  
 2 specifications were consistent with previous studies.[24,35]

3 The total mortality burden attributable to non-reference temperatures can be  
 4 assessed in terms of fraction and number of deaths, and the attributable number can be  
 5 obtained from the sum of the contributions from all days in the series; its ratio with  
 6 total number of deaths produces the total attributable fraction.[19] The overall  
 7 cumulative relative risk corresponding to each day's temperature was used to compute  
 8 the attributable fraction and number:

$$AF_{x,t} = 1 - \exp \left[ - \sum_{l=0}^L \beta_{x_{t-l}} \right]$$

$$AN_{x,t} = AF_{x,t} \times n_t$$

9 where  $AF_{x,t}$  and  $AD_{x,t}$  are the attributable fraction and the number of cases at day  $t$   
 10 (1,2,3...2907), respectively;  $\beta_x$  is the risk associated with the exposure to ambient  
 11 temperatures at level  $x$  (i.e.,  $\beta_x = (x - Ref) \times \beta$ ; *Ref* is the referenced temperature;  
 12  $\beta$  is the coefficient for DLNM of mean temperature;  $L$  is the maximum lag for the  
 13 effect of mean temperature; and  $n_t$  is the observed number of deaths at day  $t$ .

14 To estimate the mortality burden from non-accidental deaths, we calculated the  
 15 total attributable fraction due to the overall temperatures and divided the total effect  
 16 into exposure to low and high temperatures by summing the subsets corresponding to  
 17 days with temperatures below and above the median temperature. Also, we explored  
 18 the mortality burden attributable to mild and extreme temperatures. Extreme cold and  
 19 heat were defined as temperatures below the 2.5<sup>th</sup> percentile (5.4°C) and above the  
 20 97.5<sup>th</sup> percentile (23.1°C) of mean temperature, and mild cold and heat were defined  
 21 as the range between the median temperature and these cutoffs. Monte-Carlo  
 22 simulations were used to calculate the empirical confidence intervals (eCIs) of the  
 23 attributable fraction and number, assuming a multivariate normal distribution of the  
 24 best linear unbiased predictions of the deduced coefficients[19,36]. All statistical  
 25 analyses involved use of R v3.0.3, with the “dlnm” package to create the DLNM for  
 26 mean temperature.

### 27 3. Results

#### 28 3.1 Descriptive statistics

1 We analyzed 89,467 non-accidental deaths from Yuxi between 2009 and 2016,  
2 with an average of 33 deaths per day (range 12 to 72). The number of deaths due to  
3 cardiovascular disease was 41,794 (46.7%), more than half due to stroke; the  
4 proportion due to respiratory disease was 18.5% (Table 1). In individual  
5 characteristics subgroup, a higher proportion of deaths were for males, older people  
6 ( $\geq 75$  years), people with Han nationality, farmers and married people than their  
7 corresponding categories. During the study period, the mean daily temperature was  
8 16.1 °C (ranging from -3.3 to 25.6 °C) (Table S1). The daily number of non-  
9 accidental deaths and mean temperature showed an inverse relation (Figure 1).

### 10 **3.2 Exposure–response association**

11 The overall effect of mean temperature on mortality (i.e., the total non-accidental  
12 deaths and by specified causes and individual characteristics) for lag 0–28 days and  
13 mean daily temperature distribution are presented in Figure 2. In general, the  
14 temperature–mortality associations were nonlinear and followed slide-shaped curves:  
15 the risks due to heat (both mild and extreme) were low and changed slightly  
16 (approximately 1), whereas the risks due to mild cold and especially extreme cold  
17 were increased. The relative risks rapidly increased with decreasing mean temperature.  
18 The distribution of mean daily temperature was skewed to the left.

### 19 **3.3 Attributable fraction and number**

20 Table 2 shows the estimated attributable fraction with 95% eCIs of daily non-  
21 accidental mortality calculated for total and separate components by heat and cold  
22 temperatures. For total non-accidental deaths, the attributable fraction was 4.75%  
23 (95% eCI 2.33, 6.79) with the whole temperature range, including heat and cold. Cold  
24 temperature was responsible for most of the mortality burden, corresponding to an  
25 attributable risk of 4.08% (0.86, 7.12), whereas the burden due to heat was low and  
26 non-significant (0.67%; -2.44, 3.64). The attributable risks of cardiovascular and  
27 stroke deaths caused by overall temperatures were 5.97% (2.74, 8.74) and 6.50%  
28 (2.22, 10.16); the point-estimated risk due to cold was higher for cardiovascular than  
29 respiratory deaths (6.18% vs 3.50%).

30 On stratification by age, the attributable risk due to ambient temperatures  
31 increased with age, with attributable fractions of 1.83%, 2.27%, and 6.87% for age  
32  $\leq 64$ , 65–74, and  $\geq 75$  years, respectively. Those engaged in agriculture had higher  
33 attributable fraction, 3.23 times (5.66% vs 1.75%) due to the overall temperatures and  
34 3.98 times (4.93% vs 1.24%) due to cold, than non-farmers. The estimated burden due

1 to cold was 2.35-fold higher for ethnic minorities than Han nationality (6.55% vs  
2 2.79%), whereas the point-estimated attributable fraction caused by the whole  
3 temperature range was approximately equal by gender and marital status.

4 Table 3 displays the estimated mortality fraction attributable to overall  
5 temperatures, separated by mild and extreme temperatures. In general, the risk of non-  
6 accidental deaths attributable to extreme cold was 1.17% (0.58, 1.69), accounting for  
7 a clearly high proportion of 24.6% of the total mortality burden (4.75%) due to the  
8 whole temperature range, whereas attributable risks due to mild cold or heat or  
9 extreme heat were non-significant. In the cause-specific analyses, the attributable  
10 fractions due to extreme cold were 1.57%, 1.63%, and 1.49% for cardiovascular  
11 disease, stroke, and heart disease, with no significant association with respiratory  
12 disease. The extreme cold-related burden for older people, females, farmers, and non-  
13 married individuals was slightly higher than their corresponding categories.

14 Table S2 presents the attributable number of deaths due to mean temperature,  
15 overall and by cold and heat. An estimated 4,131 non-accidental deaths were due to  
16 overall temperatures and 3,482 to cold. Table S3 shows the excess mortality due to  
17 extreme and mild cold and mild and extreme heat. Figures 3 and S1 illustrate the daily  
18 deaths attributable to cold and heat. The attributable deaths were much larger with  
19 cold than heat.

### 20 3.4 Sensitivity analysis

21 Sensitivity analysis to check the stability of our main findings involved changing  
22 the maximum lag days (7, 14, and 21) and the *df* of the natural cubic splines for the  
23 calendar time (5, 6, 8, and 9 per year) and for the 4 other meteorological variables one  
24 by one (2, 4, and 5). The attributable fractions for non-accidental mortality due to  
25 overall temperatures were relatively robust with sensitivity analyses (Table S4) and  
26 the results by causes of deaths and individual characteristics were robust (results not  
27 shown).

## 29 4. Discussion

30 We quantitatively estimated the attributable risks of non-accidental death and  
31 subgroups by specific causes and individual characteristics due to the whole  
32 temperature range and to extreme and mild cold and mild and extreme heat for 89,467  
33 deaths between 2009 and 2016 in Yuxi, China, a high-altitude region with a unique,



1 subtropical, plateau monsoon climate. The temperature–mortality associations were  
2 nonlinear and followed slide-shaped curves, and the risks rapidly increased with  
3 decreasing mean temperature. Excess deaths were attributable to overall temperatures,  
4 and cold was responsible for most of the mortality burden. The estimated mortality  
5 burden attributable to cold was greater for cardiovascular deaths, older people,  
6 farmers, ethnic minorities, and non-married individuals than their corresponding  
7 categories.

8 In the present study, all of the cause-specific deaths we examined were closely  
9 related to ambient temperatures. The relations were non-linear, with increased relative  
10 risk with low temperature, especially extreme cold; however, the risk of high  
11 temperature changed minimally. A number of researchers have found that the  
12 temperature–response association presents a “U” or “V” shape, with increased  
13 mortality risks at extremely low and high temperatures.[26,37-39] We also examined  
14 additional non-accidental deaths attributable to ambient temperatures, with larger  
15 burden due to cold than heat. A multi-country observational study estimated a total  
16 mortality burden of death attributable to non-optimal ambient temperatures; the  
17 attributable fraction ranged from 3.37% in Thailand to 11% in China, which provides  
18 strong evidence for substantial differences between regions or climates.[17]

19 The cold-related mortality burden is an important public health problem in Yuxi.  
20 Findings from our study showed most of the death burden attributable to low  
21 temperature, and a much lower and non-significant burden due to heat, which might  
22 be owing to unique climatic condition that the differences between minimum and  
23 referent temperature was 20.3°C (-3.3°C vs 17.0°C), while those between referent and  
24 maximum temperature was 8.6°C (17.0°C vs 25.6°C). Previous studies have found  
25 that most of the mortality burden is caused by exposure to cold days, with  
26 comparatively lower attributable risk, or even none, due to heat exposure. For  
27 example, Hajat et al. (2006) showed that all-cause mortality attributable to heat  
28 ranged from 0.37% in London (1976–2003) to 1.45% in Milan (1985–2002), and  
29 another study conducted in London from 1986 to 1996 found that attributable fraction  
30 of mortality for each 1°C decrease below a threshold of 15°C was 5.42% (4.13, 6.69),  
31 with no burden due to heat.[40] Although extremely low or high temperature  
32 corresponded to increased relative risk of mortality, Gasparrini et al. (2015) found a  
33 relatively small part of the death burden attributable to extreme cold temperature,  
34 ranging from 0.25% to 1.06%. Similar results from 5 East Asian regions showed a

1 9.36% mortality burden attributable to overall temperatures, with only 0.80% due to  
2 extreme cold [20]. However, our current study estimated a larger proportion of  
3 attributable mortality fraction due to extreme cold, accounting for about one-quarter  
4 of the total mortality burden (1.17% vs 4.75%), even though extreme cold days  
5 represented only 2.5% of the whole study period. We found no evidence of additional  
6 deaths due to extreme heat in all categories.

7 Exposure to low temperature has been widely demonstrated to be strongly  
8 associated with excess cardiovascular and respiratory deaths,[20,31,41,42] and the  
9 biological processes that underlie cold-related mortality are associated with cardio-  
10 respiratory disease.[11,17,31,43] We found a higher point-estimated attributable risk  
11 caused by cold for cardiovascular than respiratory disease deaths. A multi-city study  
12 including 15 Chinese megacities also identified 15.8% of the cardiovascular mortality  
13 burden due to cold days.[26] The increased cold-related cardiovascular deaths mainly  
14 involved changes in vascular tone, autonomic nervous system response, arrhythmia,  
15 and oxidative stress.[44-46] Although we found no evidence for excess burden of  
16 respiratory deaths due to cold or heat, other reports have described increased  
17 respiratory deaths attributable to ambient temperatures.[10,47] For heart and stroke,  
18 the burden of mortality was attributable to only extreme cold, with approximately  
19 equivalent values, and other studies found excess heart and stroke deaths attributable  
20 to low and/or high temperatures.[24,27,41,48]

21 Age has been frequently identified as an important modifier of the association  
22 between ambient temperatures and human health.[15,26,30,49] We found that  
23 exposure to cold, particularly extreme cold, was closely related to increased death  
24 burden for older than younger people. Several previous surveys found increased age  
25 associated with point-estimated attributable risk of cardiovascular mortality and both  
26 intra-cerebral hemorrhage and ischemic stroke morbidity due to cold, with the highest  
27 values in older people.[26,32] Another nationwide study in Japan found most of the  
28 proportion of morbidity burden attributable to days with low temperature in all age  
29 groups, with an trend of increasing attributable risk with age: the attributable fraction  
30 due to cold was 15.96%, 24.84%, and 28.10% with age 18–64, 65–74, and 75–110  
31 years, respectively.[37] Older people were more vulnerable to the temperature effects,  
32 mainly because they often have multiple pre-existing chronic conditions and  
33 physiological changes in thermoregulation and homeostasis.[50,51] However, the  
34 effect modification of temperature-related mortality by gender has been



1 identified.[24,30,37,52] We observed a higher mortality burden caused by exposure to  
2 the cold period among females than males in Yuxi, and the cold-related attributable  
3 risk was found higher for females than males in Hanoi, Vietnam,[53] and in 47 cities  
4 in Japan.[37] The reason for the discrepancy in temperature-related burden by gender  
5 might be owing to differences in occupational exposure, physiology and  
6 thermoregulation.

7 A survey in Adelaide, South Australia, provided epidemiological evidence for  
8 the impact of heat waves on worker health and safety, which implied that personal  
9 occupation might modify the temperature–mortality association.[54] Our previous  
10 studies (Ding et al., 2016a, 2016b) revealed that farmers were more likely than non-  
11 farmers to die on high DTR or cold days, and the present study also showed a higher  
12 mortality burden attributable to cold and extreme cold days for farmers than non-  
13 farmers. In southwestern China, farmers universally have a poor educational level,  
14 disadvantaged socioeconomic status, and low annual income, which may be linked to  
15 poor living conditions, malnutrition, and non-access to basic health care. In addition,  
16 farmers working in the fields may have more exposure to ambient temperatures,  
17 because farming is basically highly related to weather.[55]

18 A study of 9 cities in California found that with each 10°F (4.7°C) increase in  
19 mean temperature, the mortality was increased 4.9%, 2.5%, and 1.8% for Blacks,  
20 Whites, and Hispanics, respectively.[30] Also, our previous research demonstrated  
21 less risk of high DTR associated with non-accidental mortality for the current day for  
22 people of Dai ethnic minority than Han nationality.[13] To our knowledge, no study  
23 has estimated the potential effect modification of mortality burden attributable to  
24 ambient temperatures by ethnicity. We observed a greater cold- and mild cold-related  
25 death for ethnic minorities than Han nationality in Yuxi, which indicated that  
26 race/ethnicity may modify the cold-associated mortality burden. We also found lower  
27 death burden caused by cold and extreme cold for married people versus those never  
28 married, divorced, or widowed, possibly because married people can be cared for by  
29 their partners during the cold period.

30 Our study has some limitations. First, the data were from a single city, so  
31 generalizing the findings to other geographic areas or climates should be cautioned.  
32 Second, the data of temperature were from monitoring sites rather than exposure  
33 measuring of individual. Third, although the concentration of daily mean PM<sub>10</sub>, NO<sub>2</sub>  
34 and SO<sub>2</sub> in Yuxi are much lower than those in other 17 Chinese cities [56], we did not

1 control for the potential confounding effects by air pollution due to the unavailability  
2 of the complete pollution data in the study area.

## 3 4 **5. Conclusions**

5 Our study conducted in a high plateau city in southwest China found that most of  
6 the death burden attributable to cold temperature. Our study may have implications  
7 for both the research domain and public health policy arena, which may help  
8 policymakers develop intervention strategies to minimize the health effects due to  
9 adverse temperatures and predict the climate-change impact in this region. Local  
10 residents, especially the vulnerable populations such as older people and farmers,  
11 need to strengthen their awareness of cold exposure, such as the adaptation of houses  
12 (e.g., using the air conditioning systems), spending less time outdoors or wearing  
13 more clothing when the temperature drops.

## 14 15 **Declarations**

16 **Contributors:** Q.Y.Z., Z.D., and C.Y.D. conceived and designed the experiments.  
17 L.J.L. and Y.F.W. provide primary data. P.G., S.Y.Y., J.L., Y.W., and C.Y.D.  
18 collected and cleaned the data. C.Y.D. analyzed the data and drafted the manuscript.  
19 Q.Y.Z., Z.D., and C.Y.D. revised the manuscript and interpreted the results. All  
20 authors read and approved the final manuscript.

21  
22 **Funding:** This study was supported by the Department of Education, Guangdong  
23 Government under the Top-tier University Development Scheme for Research and  
24 Control of Infectious Diseases (2016016), the National Natural Science Foundation of  
25 China (No. 81703323), National key R & D program of China (2016YFC1304000),  
26 and the Scientific Research Program of Health Bureau of Yuxi City (2014).

27  
28 **Competing interests:** The authors declare no competing financial interests.

29  
30 **Data sharing statement:** Please contact the corresponding author for data requests.

## 1 **References:**

1. Watts N, Adger WN, Agnolucci P, Blackstock J, Byass P, et al. (2015) Health and climate change: policy responses to protect public health. *Lancet* 386: 1861-1914.
2. Lee JY, Kim H (2016) Projection of future temperature-related mortality due to climate and demographic changes. *Environ Int* 94: 489-494.
3. Zhan Z, Zhao Y, Pang S, Zhong X, Wu C, et al. (2017) Temperature change between neighboring days and mortality in United States: A nationwide study. *Science of the Total Environment* 584.
4. Song X, Wang S, Hu Y, Yue M, Zhang T, et al. (2017) Impact of ambient temperature on morbidity and mortality: An overview of reviews. *Sci Total Environ* 586: 241-254.
5. Gasparrini A, Guo Y, Hashizume M, Lavigne E, Zanobetti A, et al. (2015) Mortality risk attributable to high and low ambient temperature: a multicountry observational study. *Lancet* 386: 369-375.
6. Rytli NR, Guo Y, Jaakkola JJ (2016) Global Association of Cold Spells and Adverse Health Effects: A Systematic Review and Meta-Analysis. *Environ Health Perspect* 124: 12-22.
7. Guo Y, Gasparrini A, Armstrong BG, Tawatsupa B, Tobias A, et al. (2017) Heat Wave and Mortality: A Multicountry, Multicommunity Study. *Environ Health Perspect* 125: 087006.
8. Hajat S, Armstrong B, Baccini M, Biggeri A, Bisanti L, et al. (2006) Impact of high temperatures on mortality: is there an added heat wave effect? *Epidemiology* 17: 632-638.
9. Analitis A, Katsouyanni K, Biggeri A, Baccini M, Forsberg B, et al. (2008) Effects of cold weather on mortality: results from 15 European cities within the PHEWE project. *Am J Epidemiol* 168: 1397-1408.
10. Cui Y, Yin F, Deng Y, Volinn E, Chen F, et al. (2016) Heat or Cold: Which One Exerts Greater Deleterious Effects on Health in a Basin Climate City? Impact of Ambient Temperature on Mortality in Chengdu, China. *Int J Environ Res Public Health* 13.
11. Tian L, Qiu H, Sun S, Lin H (2016) Emergency Cardiovascular Hospitalizations Risk Attributable to Cold Temperatures in Hong Kong. *Circulation Cardiovascular Quality & Outcomes* 9: CIRCOUTCOMES.115.002410.
12. Ma W, Wang L, Lin H, Liu T, Zhang Y, et al. (2015) The temperature-mortality relationship in China: An analysis from 66 Chinese communities. *Environ Res* 137: 72-77.
13. Ding Z, Li L, Xin L, Pi F, Dong W, et al. (2016) High diurnal temperature range and mortality: Effect modification by individual characteristics and mortality causes in a case-only analysis. *Sci Total Environ* 544: 627-634.
14. Zanobetti A, O'Neill MS, Gronlund CJ, Schwartz JD (2013) Susceptibility to mortality in weather extremes: effect modification by personal and small-area characteristics. *Epidemiology* 24: 809-819.
15. Basagana X, Sartini C, Barrera-Gomez J, Dadvand P, Cunillera J, et al. (2011) Heat waves and cause-specific mortality at all ages. *Epidemiology* 22: 765-772.
16. Lin H, Liu T, Xiao J, Zeng W, Li X, et al. (2016) Mortality burden of ambient fine particulate air pollution in six Chinese cities: Results from the Pearl River Delta study. *Environment International* 96: 91-97.

- 1 17. Gasparrini A, Guo Y, Hashizume M, Lavigne E, Zanobetti A, et al. (2015) Mortality  
2 risk attributable to high and low ambient temperature: a multicountry  
3 observational study. *The Lancet* 386: 369-375.
- 4 18. Steenland K, Armstrong B (2006) An Overview of Methods for Calculating the  
5 Burden of Disease Due to Specific Risk Factors. *Epidemiology* 17: 512.
- 6 19. Gasparrini A, Leone M (2014) Attributable risk from distributed lag models. *BMC*  
7 *Med Res Methodol* 14: 55.
- 8 20. Lee WH, Lim YH, Dang TN, Seposo X, Honda Y, et al. (2017) An Investigation on  
9 Attributes of Ambient Temperature and Diurnal Temperature Range on  
10 Mortality in Five East-Asian Countries. *Sci Rep* 7: 10207.
- 11 21. Yang J, Zhou M, Ou CQ, Yin P, Li M, et al. (2017) Seasonal variations of  
12 temperature-related mortality burden from cardiovascular disease and  
13 myocardial infarction in China. *Environ Pollut* 224: 400-406.
- 14 22. Chung Y, Lim YH, Honda Y, Guo YL, Hashizume M, et al. (2015) Mortality related  
15 to extreme temperature for 15 cities in northeast Asia. *Epidemiology* 26: 255-  
16 262.
- 17 23. Guo Y, Gasparrini A, Armstrong B, Li S, Tawatsupa B, et al. (2014) Global  
18 variation in the effects of ambient temperature on mortality: a systematic  
19 evaluation. *Epidemiology* 25: 781-789.
- 20 24. Yang J, Yin P, Zhou M, Ou CQ, Li M, et al. (2016) The burden of stroke mortality  
21 attributable to cold and hot ambient temperatures: Epidemiological evidence  
22 from China. *Environ Int* 92-93: 232-238.
- 23 25. Wang C, Zhang Z, Zhou M, Zhang L, Yin P, et al. (2017) Nonlinear relationship  
24 between extreme temperature and mortality in different temperature zones:  
25 A systematic study of 122 communities across the mainland of China. *Science*  
26 *of the Total Environment* 586: 96-106.
- 27 26. Yang J, Yin P, Zhou M, Ou CQ, Guo Y, et al. (2015) Cardiovascular mortality risk  
28 attributable to ambient temperature in China. *Heart* 101: 1966-1972.
- 29 27. Group TE (1997) Cold exposure and winter mortality from ischaemic heart  
30 disease, cerebrovascular disease, respiratory disease, and all causes in warm  
31 and cold regions of Europe. The Eurowinter Group. *Lancet* 349: 1341-1346.
- 32 28. Diaz J, Carmona R, Miron IJ, Ortiz C, Linares C (2015) Comparison of the effects  
33 of extreme temperatures on daily mortality in Madrid (Spain), by age group:  
34 The need for a cold wave prevention plan. *Environ Res* 143: 186-191.
- 35 29. Ding Z, Guo P, Xie F, Chu H, Li K, et al. (2015) Impact of diurnal temperature  
36 range on mortality in a high plateau area in southwest China: A time series  
37 analysis. *Sci Total Environ* 526: 358-365.
- 38 30. Basu R, Ostro BD (2008) A multicounty analysis identifying the populations  
39 vulnerable to mortality associated with high ambient temperature in  
40 California. *Am J Epidemiol* 168: 632-637.
- 41 31. Moghadamnia MT, Ardalan A, Mesdaghinia A, Keshtkar A, Naddafi K, et al. (2017)  
42 Ambient temperature and cardiovascular mortality: a systematic review and  
43 meta-analysis. *PeerJ* 5: e3574.
- 44 32. Guo P, Zheng M, Feng W, Wu J, Deng C, et al. (2017) Effects of ambient  
45 temperature on stroke hospital admissions: Results from a time-series  
46 analysis of 104,432 strokes in Guangzhou, China. *Sci Total Environ* 580: 307-  
47 315.
- 48 33. Ma W, Zeng W, Zhou M, Wang L, Rutherford S, et al. (2015) The short-term  
49 effect of heat waves on mortality and its modifiers in China: An analysis from  
50 66 communities. *Environment International* 75: 103-109.

- 1 34. Lin H, Ratnapradipa K, Wang X, Zhang Y, Xu Y, et al. (2017) Hourly peak  
2 concentration measuring the PM 2.5 -mortality association: Results from six  
3 cities in the Pearl River Delta study. *Atmospheric Environment*.
- 4 35. Ding Z, Li L, Wei R, Dong W, Guo P, et al. (2016) Association of cold temperature  
5 and mortality and effect modification in the subtropical plateau monsoon  
6 climate of Yuxi, China. *Environ Res* 150: 431-437.
- 7 36. Greenland S (2004) Interval estimation by simulation as an alternative to and  
8 extension of confidence intervals. *Int J Epidemiol* 33: 1389-1397.
- 9 37. Onozuka D, Hagihara A (2017) Out-of-hospital cardiac arrest risk attributable to  
10 temperature in Japan. *Sci Rep* 7: 39538.
- 11 38. Wang X, Li G, Liu L, Westerdahl D, Jin X, et al. (2015) Effects of Extreme  
12 Temperatures on Cause-Specific Cardiovascular Mortality in China. *Int J*  
13 *Environ Res Public Health* 12: 16136-16156.
- 14 39. Yan C, Fei Y, Ying D, Volinn E, Fei C, et al. (2016) Heat or Cold: Which One  
15 Exerts Greater Deleterious Effects on Health in a Basin Climate City? Impact  
16 of Ambient Temperature on Mortality in Chengdu, China. *International*  
17 *Journal of Environmental Research & Public Health* 13: 1225.
- 18 40. Carson C, Hajat S, Armstrong B, Wilkinson P (2006) Declining vulnerability to  
19 temperature-related mortality in London over the 20th century. *Am J*  
20 *Epidemiol* 164: 77-84.
- 21 41. Breitner S, Wolf K, Peters A, Schneider A (2014) Short-term effects of air  
22 temperature on cause-specific cardiovascular mortality in Bavaria, Germany.  
23 *Heart* 100: 1272-1280.
- 24 42. Braga AL, Zanobetti A, Schwartz J (2002) The effect of weather on respiratory  
25 and cardiovascular deaths in 12 U.S. cities. *Environ Health Perspect* 110: 859-  
26 863.
- 27 43. Medina-Ramon M, Zanobetti A, Cavanagh DP, Schwartz J (2006) Extreme  
28 temperatures and mortality: assessing effect modification by personal  
29 characteristics and specific cause of death in a multi-city case-only analysis.  
30 *Environ Health Perspect* 114: 1331-1336.
- 31 44. Westfall TC, Yang CL, Chen X, Naes L, Vickery L, et al. (2005) A novel  
32 mechanism prevents the development of hypertension during chronic cold  
33 stress. *Auton Autacoid Pharmacol* 25: 171-177.
- 34 45. Luo B, Shi H, Wang L, Shi Y, Wang C, et al. (2014) Rat lung response to PM2.5  
35 exposure under different cold stresses. *Int J Environ Res Public Health* 11:  
36 12915-12926.
- 37 46. Tuo B, Li C, Peng L, Ye M, Liu W, et al. (2014) Analysis of differentially expressed  
38 genes in cold-exposed mice to investigate the potential causes of cold-  
39 induced hypertension. *Exp Ther Med* 8: 110-114.
- 40 47. Zhang Y, Li C, Feng R, Zhu Y, Kai W, et al. (2016) The Short-Term Effect of  
41 Ambient Temperature on Mortality in Wuhan, China: A Time-Series Study  
42 Using a Distributed Lag Non-Linear Model. *International Journal of*  
43 *Environmental Research & Public Health* 13: 722-734.
- 44 48. Gasparrini A, Armstrong B, Kovats S, Wilkinson P (2012) The effect of high  
45 temperatures on cause-specific mortality in England and Wales. *Occup*  
46 *Environ Med* 69: 56-61.
- 47 49. Rocklöv J, Ebi K, Forsberg B (2011) Mortality Related to Temperature and  
48 Persistent Extreme Temperatures-A Study of Cause-Specific and Age  
49 Stratified Mortality. *Occupational & Environmental Medicine* 68: 531.
- 50 50. Analitis A, Katsouyanni K, Biggeri A, Baccini M, Forsberg B, et al. (2008) Effects  
51 of cold weather on mortality: results from 15 European cities within the  
52 PHEWE project. *American Journal of Epidemiology* 168: 1397-1408.

- 1  
2  
3 1 51. Gasparrini A, Armstrong B, Kovats S, Wilkinson P (2012) The effect of high  
4 2 temperatures on cause-specific mortality in England and Wales. *Occupational  
5 3 & Environmental Medicine* 69: 56.  
6 4  
7 52. Seposo XT, Dang TN, Honda Y (2015) Evaluating the Effects of Temperature on  
8 5 Mortality in Manila City (Philippines) from 2006-2010 Using a Distributed Lag  
9 6 Nonlinear Model. *International Journal of Environmental Research & Public  
10 7 Health* 12: 6842-6857.  
11 8  
12 53. Xuan LTT, Egondi T, Ngoan LT, Toan DTT, Huong LT (2014) Seasonality in  
13 9 mortality and its relationship to temperature among the older population in  
14 10 Hanoi, Vietnam. *Global Health Action* 7: 23115.  
15 11  
16 54. Xiang J, Bi P, Pisaniello D, Hansen A (2014) The impact of heatwaves on workers'  
17 12 health and safety in Adelaide, South Australia. *Environ Res* 133: 90-95.  
18 13  
19 55. Mutekwa VT (2009) Climate change impacts and adaptation in the agricultural  
20 14 sector: the case of smallholder farmers in Zimbabwe. *Journal of Sustainable  
21 15 Development in Africa* 11.  
22 16  
23 56. Chen R, Samoli E, Wong CM, Huang W, Wang Z, et al. (2012) Associations  
24 17 between short-term exposure to nitrogen dioxide and mortality in 17 Chinese  
25 18 cities: the China Air Pollution and Health Effects Study (CAPES). *Environment  
26 19 International* 118: 101-106.  
27  
28  
29  
30  
31  
32  
33  
34  
35  
36  
37  
38  
39  
40  
41  
42  
43  
44  
45  
46  
47  
48  
49  
50  
51  
52  
53  
54  
55  
56  
57  
58  
59  
60



**Table 1.** Daily total non-accidental mortality and by specific causes and individual characteristics in Yuxi, China, 2009–2016.

|                      | Total deaths | Min | Median (25 <sup>th</sup> , 75 <sup>th</sup> ) | Max | Mean (SD)  |
|----------------------|--------------|-----|-----------------------------------------------|-----|------------|
| Total non-accidental | 89,467       | 12  | 32 (28, 38)                                   | 72  | 33.0 (7.8) |
| Cause-specific       |              |     |                                               |     |            |
| Cardiovascular       | 41,794       | 2   | 15 (12, 18)                                   | 37  | 15.4 (4.9) |
| Heart                | 17,793       | 0   | 6 (4, 8)                                      | 22  | 6.6 (3.0)  |
| Stroke               | 22,589       | 0   | 8 (6, 10)                                     | 22  | 8.3 (3.3)  |
| Respiratory          | 16,565       | 0   | 6 (4, 8)                                      | 21  | 6.1 (3.1)  |
| Age, years           |              |     |                                               |     |            |
| ≤64                  | 21,678       | 1   | 8 (6, 10)                                     | 19  | 8.0 (2.9)  |
| 65–74                | 20,072       | 0   | 7 (5, 9)                                      | 19  | 7.4 (2.9)  |
| ≥75                  | 47,717       | 4   | 17 (14, 21)                                   | 43  | 17.6 (5.6) |
| Gender               |              |     |                                               |     |            |
| Male                 | 48,939       | 5   | 18 (14, 21)                                   | 43  | 18.1 (5.2) |
| Female               | 40,528       | 2   | 15 (12, 18)                                   | 36  | 15.0 (4.5) |
| Occupation           |              |     |                                               |     |            |
| Farmer               | 68,278       | 0   | 7 (5, 10)                                     | 33  | 7.8 (3.4)  |
| Non-farmer           | 21,189       | 7   | 25 (20, 30)                                   | 57  | 25.2 (7.0) |
| Ethnic               |              |     |                                               |     |            |
| Han nationality      | 63,275       | 6   | 23 (19, 27)                                   | 54  | 23.4 (6.4) |
| Ethnic minorities    | 26,192       | 0   | 9 (7, 12)                                     | 24  | 9.7 (3.6)  |
| Marital status       |              |     |                                               |     |            |
| Married              | 54,971       | 1   | 12 (10, 15)                                   | 32  | 12.7 (4.3) |
| Non-married          | 34,496       | 4   | 20 (16, 24)                                   | 49  | 20.3 (5.5) |

Min, minimum; Max maximum; 25<sup>th</sup>, 25<sup>th</sup> percentile of the distributions; 75<sup>th</sup>, 75<sup>th</sup> percentile of the distributions.



**Table 2.** Attributable fraction (%) of total non-accidental mortality and by specific causes and individual characteristics due to mean daily temperature and cold and heat over lag 0–28 days in Yuxi, China.

|                      | Total (%)                 | Cold (%)                  | Heat (%)            |
|----------------------|---------------------------|---------------------------|---------------------|
| Total non-accidental | <b>4.75 (2.33, 6.79)</b>  | <b>4.08 (0.86, 7.12)</b>  | 0.67 (-2.44, 3.64)  |
| Cause-specific       |                           |                           |                     |
| Cardiovascular       | <b>5.97 (2.74, 8.74)</b>  | <b>6.18 (1.89, 10.31)</b> | -0.21 (-5.04, 4.33) |
| Heart                | 5.25 (-0.40, 9.57)        | 6.48 (-0.70, 12.47)       | -1.23 (-8.59, 5.46) |
| Stroke               | <b>6.50 (2.22, 10.16)</b> | 6.01 (-0.11, 11.41)       | 0.49 (-6.18, 6.15)  |
| Respiratory          | 5.42 (-0.73, 9.71)        | 3.50 (-5.05, 10.95)       | 1.93 (-5.08, 7.90)  |
| Age, years           |                           |                           |                     |
| ≤64                  | 1.83 (-3.15, 5.95)        | 1.75 (-4.64, 7.10)        | 0.08 (-6.64, 5.64)  |
| 65–74                | 2.27 (-2.45, 6.30)        | 3.52 (-3.45, 9.37)        | -1.25 (-7.4, 5.01)  |
| ≥75                  | <b>6.87 (3.68, 9.46)</b>  | <b>5.34 (0.44, 9.38)</b>  | 1.53 (-2.96, 5.09)  |
| Gender               |                           |                           |                     |
| Male                 | <b>4.16 (0.82, 7.04)</b>  | 3.67 (-0.50, 7.72)        | 0.49 (-3.82, 4.31)  |
| Female               | <b>5.54 (2.18, 8.31)</b>  | <b>4.66 (0.03, 9.07)</b>  | 0.89 (-3.21, 5.03)  |
| Occupation           |                           |                           |                     |
| Farmer               | <b>5.66 (3.09, 7.92)</b>  | <b>4.93 (1.28, 8.37)</b>  | 0.73 (-2.7, 3.87)   |
| Non-farmer           | 1.75 (-3.58, 6.11)        | 1.24 (-5.77, 7.61)        | 0.52 (-6.82, 6.55)  |
| Ethnic               |                           |                           |                     |
| Han nationality      | <b>5.38 (2.44, 7.96)</b>  | 2.79 (-1.30, 6.49)        | 2.59 (-0.92, 5.80)  |
| Ethnic minorities    | 2.31 (-1.57, 6.76)        | <b>6.55 (1.15, 11.75)</b> | -4.24 (-10.8, 1.27) |
| Marital status       |                           |                           |                     |
| Married              | <b>4.24 (1.17, 6.99)</b>  | 2.74 (-1.87, 6.53)        | 1.50 (-2.67, 4.83)  |
| Non-married          | <b>5.48 (1.69, 8.56)</b>  | <b>6.10 (1.23, 10.21)</b> | -0.61 (-5.55, 3.95) |

Results are expressed as attributable fractions (95% empirical confidence intervals), and the bold indicates a statistically significant.

**Table 3.** Mortality fraction (%) attributable to extreme and mild cold and mild and extreme heat by specific causes and individual characteristics.

|                      | Extreme cold (%)         | Mild cold (%)            | Mild heat (%)       | Extreme heat (%)    |
|----------------------|--------------------------|--------------------------|---------------------|---------------------|
| Total non-accidental | <b>1.17 (0.58, 1.69)</b> | 3.06 (-0.08, 5.94)       | 0.57 (-2.36, 3.28)  | 0.12 (-0.26, 0.45)  |
| Cause-specific       |                          |                          |                     |                     |
| Cardiovascular       | <b>1.57 (0.81, 2.36)</b> | <b>4.88 (0.55, 8.60)</b> | -0.24 (-4.55, 3.40) | 0.03 (-0.50, 0.51)  |
| Heart                | <b>1.49 (0.23, 2.58)</b> | 5.25 (-1.37, 10.84)      | -1.17 (-7.78, 4.53) | -0.08 (-0.87, 0.64) |
| Stroke               | <b>1.63 (0.60, 2.65)</b> | 4.65 (-1.05, 9.49)       | 0.38 (-5.22, 5.28)  | 0.13 (-0.59, 0.78)  |
| Respiratory          | 1.35 (-0.15, 2.72)       | 2.28 (-5.64, 9.11)       | 1.70 (-4.01, 6.68)  | 0.26 (-0.48, 0.91)  |
| Age, years           |                          |                          |                     |                     |
| ≤64                  | 0.44 (-0.63, 1.43)       | 1.34 (-4.52, 6.30)       | 0.06 (-5.58, 5.56)  | 0.02 (-0.70, 0.72)  |
| 65–74                | 0.68 (-0.37, 1.72)       | 2.91 (-3.72, 8.51)       | -1.14 (-7.03, 4.22) | -0.12 (-0.83, 0.61) |
| ≥75                  | <b>1.71 (0.91, 2.48)</b> | 3.89 (-0.36, 7.66)       | 1.32 (-2.38, 4.64)  | 0.24 (-0.22, 0.68)  |
| Gender               |                          |                          |                     |                     |
| Male                 | <b>1.02 (0.28, 1.74)</b> | 2.76 (-1.08, 6.27)       | 0.41 (-3.25, 3.87)  | 0.09 (-0.40, 0.53)  |
| Female               | <b>1.36 (0.55, 2.15)</b> | 3.48 (-0.77, 7.36)       | 0.76 (-3.26, 4.20)  | 0.15 (-0.37, 0.62)  |
| Occupation           |                          |                          |                     |                     |
| Farmer               | <b>1.42 (0.82, 2.04)</b> | <b>3.71 (0.38, 6.70)</b> | 0.61 (-2.47, 3.39)  | 0.13 (-0.27, 0.52)  |
| Non-farmer           | 0.39 (-0.73, 1.41)       | 0.84 (-5.98, 6.43)       | 0.45 (-6.15, 5.95)  | 0.07 (-0.65, 0.74)  |
| Ethnic               |                          |                          |                     |                     |
| Han nationality      | <b>1.22 (0.54, 1.91)</b> | 1.69 (-2.20, 5.31)       | 2.30 (-0.73, 5.42)  | 0.34 (-0.06, 0.76)  |
| Ethnic minorities    | <b>1.03 (0.07, 1.93)</b> | <b>5.71 (0.91, 9.74)</b> | -3.84 (-9.8, 1.12)  | -0.43 (-1.12, 0.25) |
| Marital status       |                          |                          |                     |                     |
| Married              | <b>0.98 (0.26, 1.66)</b> | 1.86 (-2.06, 5.17)       | 1.32 (-2.17, 4.62)  | 0.21 (-0.24, 0.61)  |
| Non-married          | <b>1.47 (0.59, 2.25)</b> | <b>4.88 (0.19, 9.18)</b> | -0.60 (-5.16, 3.37) | -0.02 (-0.58, 0.50) |

Results are expressed as attributable fractions (95% empirical confidence intervals), and the bold indicates a statistically significant.

## Figure Legends

**Figure 1.** Time series of daily number of non-accidental deaths of Yuxi and mean temperature, 2009–2016.

**Figure 2.** Overall cumulative relative risk (with 95% empirical confidence intervals, shaded grey) at a lag of 0–28 days in Yuxi, China, with histogram of daily temperature distribution. The dotted lines are the median of the mean temperature, and the dashed lines are the 2.5th and 97.5th percentiles of the distribution of mean temperature. The lines before and after the dotted lines represent the exposure response below (blue lines) and above (red lines) the median of mean temperature.

**Figure 3.** Daily number of total non-accidental deaths attributable to cold (blue points) and heat (red points).

1  
2  
3  
4  
5  
6  
7  
8  
9  
10  
11  
12  
13  
14  
15  
16  
17  
18  
19  
20  
21  
22  
23  
24  
25  
26  
27  
28  
29  
30  
31  
32  
33  
34  
35  
36  
37  
38  
39  
40  
41  
42  
43  
44  
45  
46  
47  
48  
49  
50  
51  
52  
53  
54  
55  
56  
57  
58  
59  
60



Time series of daily number of non-accidental deaths of Yuxi and mean temperature, 2009–2016

105x52mm (300 x 300 DPI)

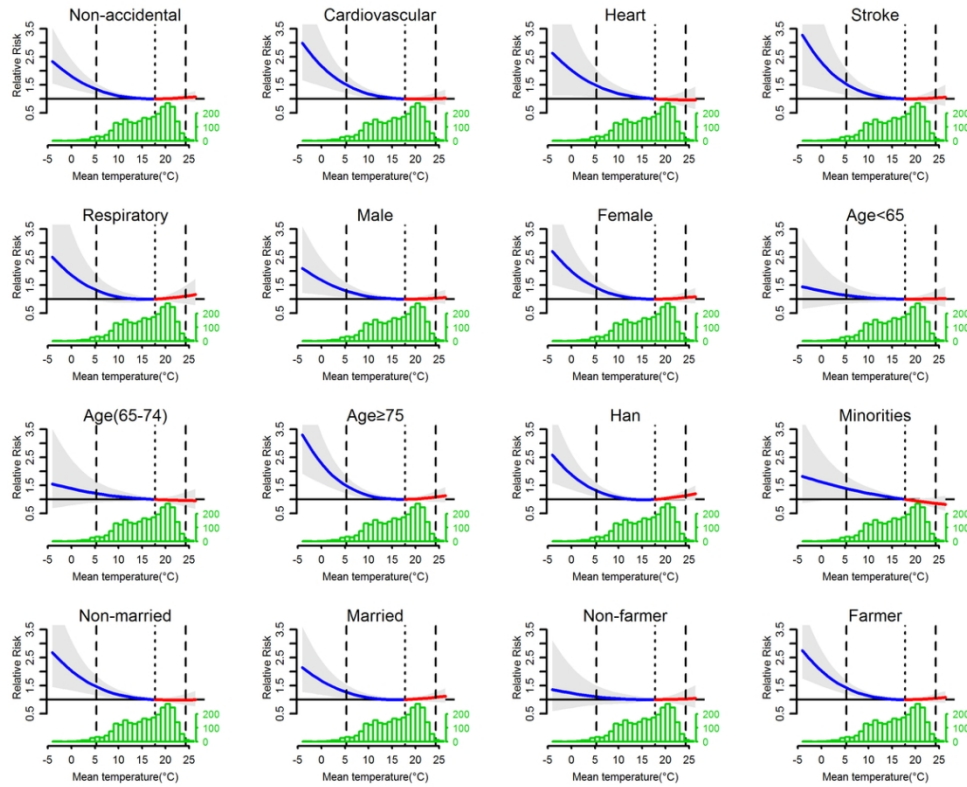

Overall cumulative relative risk (with 95% empirical confidence intervals, shaded grey) at a lag of 0–28 days in Yuxi, China, with histogram of daily temperature distribution. The dotted lines are the median of the mean temperature, and the dashed lines are the 2.5th and 97.5th percentiles of the distribution of mean temperature. The lines before and after the dotted lines represent the exposure response below (blue lines) and above (red lines) the median of mean temperature

101x81mm (300 x 300 DPI)

1  
2  
3  
4  
5  
6  
7  
8  
9  
10  
11  
12  
13  
14  
15  
16  
17  
18  
19  
20  
21  
22  
23  
24  
25  
26  
27  
28  
29  
30  
31  
32  
33  
34  
35  
36  
37  
38  
39  
40  
41  
42  
43  
44  
45  
46  
47  
48  
49  
50  
51  
52  
53  
54  
55  
56  
57  
58  
59  
60



Daily number of total non-accidental deaths attributable to cold (blue points) and heat (red points)

101x60mm (300 x 300 DPI)

## Supplemental materials

**Table S1.** Descriptive statistics for weather conditions, 2009–2016.

|                            | Min   | 25 <sup>th</sup> | Median | 75 <sup>th</sup> | Max   | Mean (SD) |
|----------------------------|-------|------------------|--------|------------------|-------|-----------|
| Mean temperature ( °C)     | -3.3  | 12.3             | 17.0   | 20.2             | 25.6  | 16.1±4.9  |
| Relative humidity (%)      | 25.0  | 58.0             | 71.0   | 78.0             | 95.0  | 67.3±14.7 |
| Atmospheric pressure (hPa) | 802.7 | 807.9            | 810.1  | 812.5            | 822.2 | 810.3±3.2 |
| Wind speed (m/s)           | 0.5   | 1.9              | 2.5    | 3.2              | 8.6   | 2.7±1.1   |
| Sunshine duration (h)      | 0     | 3.1              | 7.6    | 9.9              | 12.9  | 6.5±3.9   |

**Table S2.** Attributable number of non-accidental deaths and specific categories due to daily mean temperature, computed as total and as separated components for cold and heat temperatures over lag 0–28 days in Yuxi, China.

|                      | Total                    | Cold                    | Heat               |
|----------------------|--------------------------|-------------------------|--------------------|
| Total non-accidental | <b>4131 (2306, 5937)</b> | <b>3482 (552, 5980)</b> | 652 (-2049, 3185)  |
| Cause-specific       |                          |                         |                    |
| Cardiovascular       | <b>2419 (2622, 7476)</b> | <b>2489 (629, 4141)</b> | -68 (-2019, 1701)  |
| Heart                | <b>912 (446, 8413)</b>   | 1112 (-98, 2200)        | -199 (-1456, 918)  |
| Stroke               | <b>1417 (2055, 8814)</b> | <b>1306 (104, 2634)</b> | 113 (-1178, 1283)  |
| Respiratory          | 854 (-428, 8228)         | 540 (-846, 1689)        | 314 (-822, 1190)   |
| Age, years           |                          |                         |                    |
| ≤64                  | 414 (-2421, 5413)        | 359 (-976, 1580)        | 55 (-1384, 1237)   |
| 65-74                | 470 (-2366, 5715)        | 679 (-764, 1853)        | -209 (-1543, 953)  |
| ≥75                  | <b>3137 (3094, 7816)</b> | <b>2431 (102, 4392)</b> | 710 (-1135, 2532)  |
| Gender               |                          |                         |                    |
| Male                 | <b>1977 (818, 5961)</b>  | 1706 (-395, 3697)       | 273 (-1668, 2048)  |
| Female               | <b>2181 (1691, 7074)</b> | 1802 (-59, 3390)        | 380 (-1355, 1919)  |
| Occupation           |                          |                         |                    |
| Farmer               | <b>3752 (2730, 6784)</b> | <b>3225 (801, 5403)</b> | 530 (-1799, 2580)  |
| Non-farmer           | 364 (-2842, 5120)        | 242 (-1320, 1486)       | 124 (-1293, 1350)  |
| Ethnic               |                          |                         |                    |
| Han nationality      | <b>3243 (2237, 6688)</b> | 1624 (-972, 4023)       | 1618 (-622, 3621)  |
| Ethnic minorities    | 649 (-1165, 5773)        | <b>1685 (332, 2934)</b> | -1037 (-2677, 488) |
| Marital status       |                          |                         |                    |
| Married              | <b>2262 (1118, 5804)</b> | 1402 (-833, 3564)       | 860 (-1201, 2875)  |
| Non-married          | <b>1843 (1892, 7386)</b> | <b>2042 (334, 3527)</b> | -197 (-1963, 1218) |

Results are expressed as attributable number (95% empirical confidence interval), and the bold indicates a statistically significant.



**Table S3.** Mortality number attributable to extreme and mild cold and mild and extreme heat by specific causes and individual characteristics

|                      | Extreme cold            | Mild cold               | Mild heat          | Extreme heat    |
|----------------------|-------------------------|-------------------------|--------------------|-----------------|
| Total non-accidental | <b>1054 (604, 1530)</b> | 2556 (-117, 5016)       | 554 (-1930, 2984)  | 108 (-199, 395) |
| Cause-specific       |                         |                         |                    |                 |
| Cardiovascular       | <b>657 (331, 946)</b>   | <b>1942 (183, 3532)</b> | -84 (-1803, 1505)  | 15 (-191, 217)  |
| Heart                | <b>264 (72, 445)</b>    | 892 (-146, 1896)        | -190 (-1385, 830)  | -13 (-154, 109) |
| Stroke               | <b>368 (136, 600)</b>   | 997 (-345, 2170)        | 87 (-1095, 1183)   | 28 (-129, 169)  |
| Respiratory          | 223 (-30, 434)          | 337 (-1005, 1413)       | 277 (-643, 1006)   | 42 (-89, 161)   |
| Age, years           |                         |                         |                    |                 |
| ≤64                  | 101 (-135, 308)         | 265 (-1039, 1292)       | 46 (-1121, 1094)   | 10 (-135, 149)  |
| 65-74                | 140 (-75, 331)          | 554 (-685, 1578)        | -192 (-1434, 971)  | -20 (-181, 116) |
| ≥75                  | <b>814 (431, 1152)</b>  | 1732 (-123, 3465)       | 612 (-1103, 2097)  | 110 (-99, 313)  |
| Gender               |                         |                         |                    |                 |
| Male                 | <b>503 (118, 851)</b>   | 1257 (-681, 3097)       | 229 (-1651, 1917)  | 47 (-153, 264)  |
| Female               | <b>556 (238, 882)</b>   | 1321 (-483, 2860)       | 325 (-1203, 1755)  | 61 (-134, 248)  |
| Occupation           |                         |                         |                    |                 |
| Farmer               | <b>977 (564, 1376)</b>  | <b>2382 (27, 4440)</b>  | 446 (-1638, 2333)  | 92 (-173, 349)  |
| Non-farmer           | 83 (-125, 295)          | 158 (-1263, 1389)       | 109 (-1137, 1255)  | 16 (-128, 158)  |
| Ethnic               |                         |                         |                    |                 |
| Han nationality      | <b>772 (364, 1191)</b>  | 918 (-1565, 3045)       | 1440 (-488, 3387)  | 209 (-57, 433)  |
| Ethnic minorities    | 274 (-1, 500)           | <b>1462 (162, 2576)</b> | -941 (-2416, 330)  | -104 (-277, 62) |
| Marital status       |                         |                         |                    |                 |
| Married              | <b>544 (165, 908)</b>   | 908 (-1292, 2815)       | 759 (-995, 2607)   | 117 (-125, 344) |
| Non-married          | <b>509 (219, 781)</b>   | <b>1615 (4, 3017)</b>   | -192 (-1730, 1143) | -7 (-198, 158)  |

Results are expressed as attributable number (95% empirical confidence interval), and the bold indicates a statistically significant.

**Table S4** Sensitivity analyses to calculate the fraction (%) with 95% empirical confidence interval attributable to temperature by changing maximum lag for mean temperature and degrees of freedom (*df*) for covariates

| Model choices               | Total             | Cold               | Heat                |
|-----------------------------|-------------------|--------------------|---------------------|
| Lag period, days            |                   |                    |                     |
| 7                           | 2.85 (1.62, 3.99) | 0.97 (-1.16, 2.98) | 1.88 (0.32, 3.31)   |
| 14                          | 4.15 (2.78, 5.52) | 2.90 (0.59, 5.15)  | 1.25 (-0.48, 2.93)  |
| 21                          | 3.57 (1.51, 5.31) | 3.10 (0.25, 5.76)  | 0.47 (-1.99, 2.89)  |
| Df for time per year        |                   |                    |                     |
| 5                           | 4.69 (3.10, 6.15) | 4.19 (1.18, 6.73)  | 0.51 (-1.66, 2.81)  |
| 6                           | 5.94 (4.07, 7.53) | 4.96 (2.18, 7.72)  | 0.98 (-1.68, 3.49)  |
| 8                           | 3.82 (0.92, 6.42) | 4.72 (1.23, 8.07)  | -0.90 (-4.31, 2.26) |
| 9                           | 5.07 (2.15, 7.75) | 4.59 (0.57, 8.16)  | 0.48 (-2.98, 3.75)  |
| Df for relative humidity    |                   |                    |                     |
| 2                           | 4.64 (2.21, 6.83) | 4.07 (0.84, 7.28)  | 0.57 (-2.70, 3.56)  |
| 4                           | 4.74 (2.31, 6.88) | 4.05 (0.56, 7.26)  | 0.69 (-2.15, 3.83)  |
| 5                           | 4.79 (2.55, 6.92) | 4.20 (1.06, 7.20)  | 0.60 (-2.76, 3.36)  |
| Df for sunshine duration    |                   |                    |                     |
| 2                           | 4.71 (2.27, 6.84) | 4.18 (0.88, 7.35)  | 0.54 (-2.89, 3.51)  |
| 4                           | 4.75 (2.39, 6.95) | 4.08 (0.92, 7.03)  | 0.67 (-2.51, 3.65)  |
| 5                           | 4.78 (2.44, 6.90) | 4.13 (0.69, 7.45)  | 0.65 (-2.40, 3.63)  |
| Df for atmospheric pressure |                   |                    |                     |
| 2                           | 4.76 (2.24, 6.87) | 4.15 (0.76, 7.00)  | 0.62 (-2.69, 3.49)  |
| 4                           | 4.75 (2.21, 6.97) | 4.09 (0.39, 6.95)  | 0.67 (-2.49, 3.76)  |
| 5                           | 4.79 (2.38, 6.95) | 4.02 (1.01, 7.08)  | 0.77 (-2.30, 3.98)  |
| Df for wind speed           |                   |                    |                     |
| 2                           | 4.79 (2.26, 6.90) | 4.02 (0.47, 6.88)  | 0.78 (-2.34, 3.52)  |
| 4                           | 4.68 (2.34, 6.78) | 4.02 (0.60, 7.07)  | 0.67 (-2.48, 3.68)  |
| 5                           | 4.66 (2.31, 6.85) | 4.04 (0.90, 6.94)  | 0.62 (-2.56, 3.75)  |

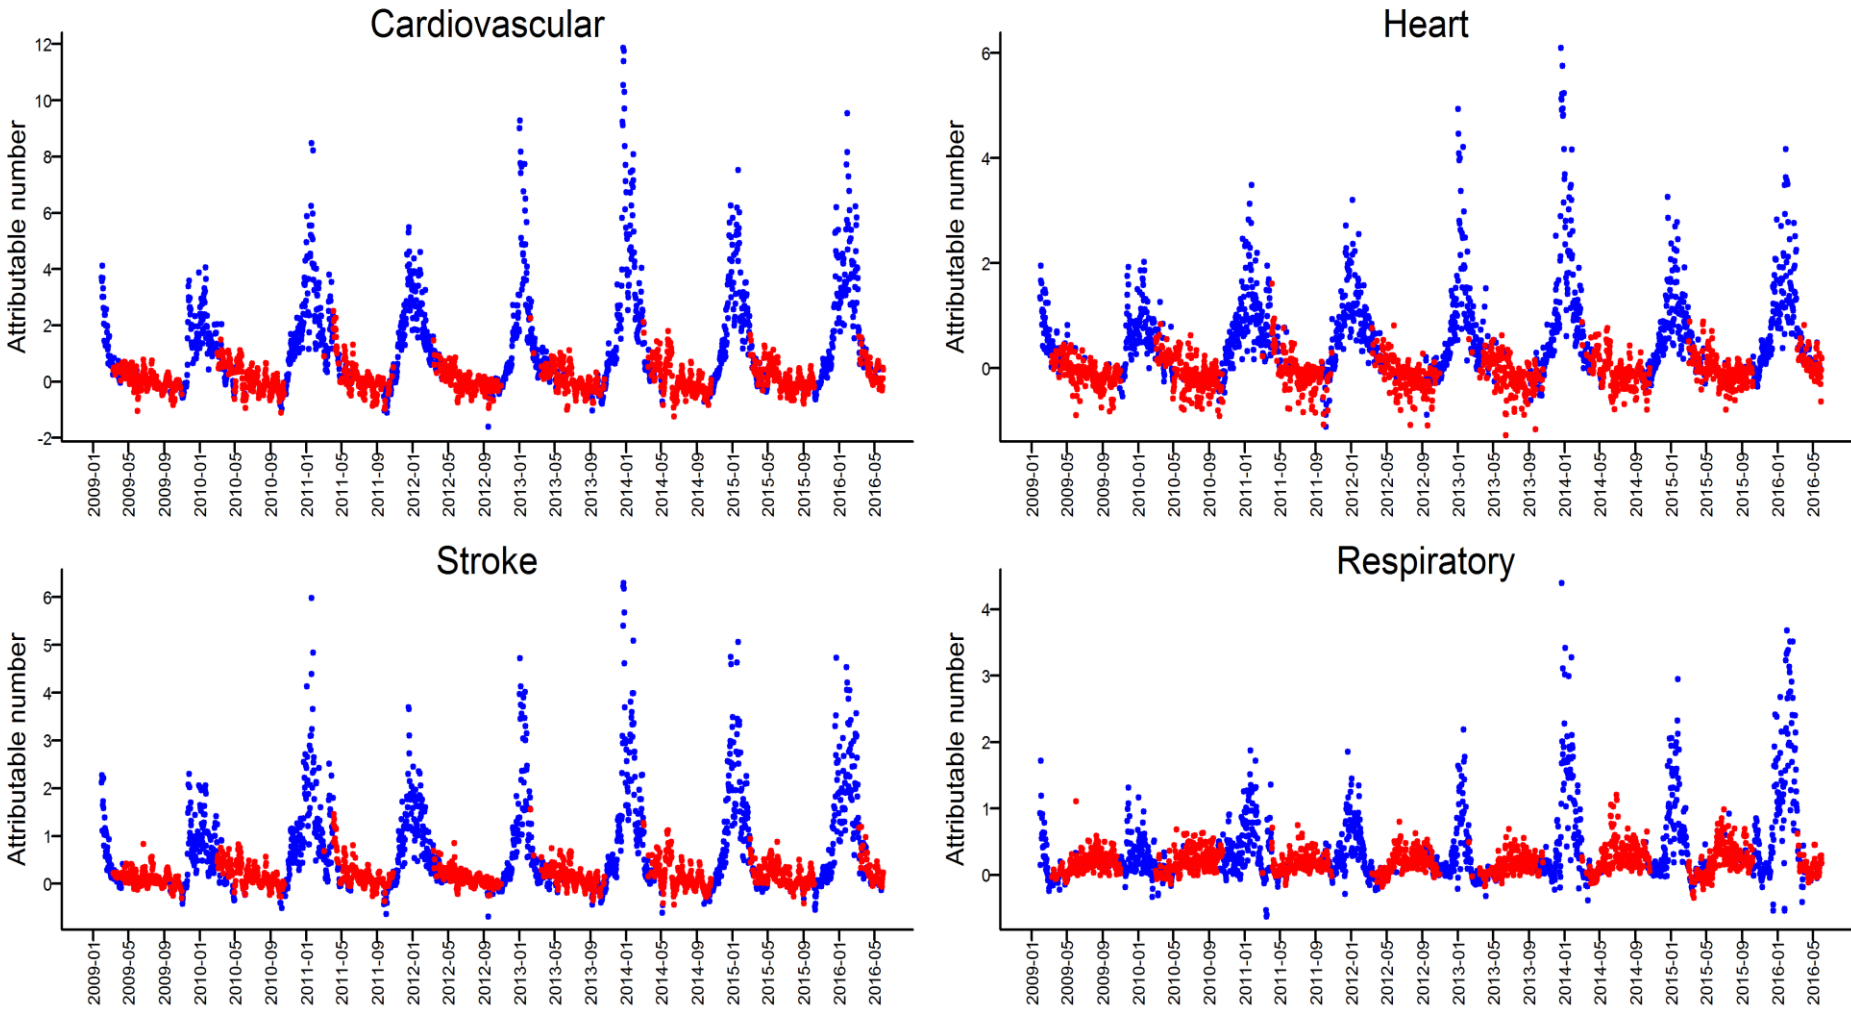

**Figure S1.** Daily number of cardiovascular, heart, stroke and respiratory deaths attributable to cold (blue points) and heat (red points) temperatures.

# BMJ Open

## Burden of non-accidental mortality attributable to ambient temperatures: a time-series study in a high plateau area of southwest China

|                                 |                                                                                                                                                                                                                                                                                                                                                                                                                                                                                                                                                                                                                                                                                                                                                                                                                                                                                                                                                                                                                                              |
|---------------------------------|----------------------------------------------------------------------------------------------------------------------------------------------------------------------------------------------------------------------------------------------------------------------------------------------------------------------------------------------------------------------------------------------------------------------------------------------------------------------------------------------------------------------------------------------------------------------------------------------------------------------------------------------------------------------------------------------------------------------------------------------------------------------------------------------------------------------------------------------------------------------------------------------------------------------------------------------------------------------------------------------------------------------------------------------|
| Journal:                        | <i>BMJ Open</i>                                                                                                                                                                                                                                                                                                                                                                                                                                                                                                                                                                                                                                                                                                                                                                                                                                                                                                                                                                                                                              |
| Manuscript ID                   | bmjopen-2018-024708.R2                                                                                                                                                                                                                                                                                                                                                                                                                                                                                                                                                                                                                                                                                                                                                                                                                                                                                                                                                                                                                       |
| Article Type:                   | Research                                                                                                                                                                                                                                                                                                                                                                                                                                                                                                                                                                                                                                                                                                                                                                                                                                                                                                                                                                                                                                     |
| Date Submitted by the Author:   | 21-Dec-2018                                                                                                                                                                                                                                                                                                                                                                                                                                                                                                                                                                                                                                                                                                                                                                                                                                                                                                                                                                                                                                  |
| Complete List of Authors:       | Deng, Changyu; Department of Preventive Medicine, Shantou University Medical College<br>Ding, Zan; The Institute of Metabolic Diseases, Baoan Central Hospital of Shenzhen, the Fifth Affiliated Hospital of Shenzhen University, Shenzhen, Guangdong 518102, China<br>LI, Liujiu; Yuxi Center for Disease Control and Prevention, Yuxi, Yunnan 653000, China<br>Wang, Yanfang; Yuxi Center for Disease Control and Prevention, Yuxi, Yunnan 653000, China<br>Guo, Pi; Department of Preventive Medicine, Shantou University Medical College, Shantou, Guangdong 515041, China<br>Yang, Shaoyi; Department of Preventive Medicine, Shantou University Medical College, Shantou, Guangdong 515041, China<br>Liu, Ju; Department of Preventive Medicine, Shantou University Medical College, Shantou, Guangdong 515041, China<br>Wang, Yue; Department of Preventive Medicine, Shantou University Medical College, Shantou, Guangdong 515041, China<br>Zhang, qingying; Department of Preventive Medicine, Shantou University Medical College, |
| <b>Primary Subject Heading</b>: | Public health                                                                                                                                                                                                                                                                                                                                                                                                                                                                                                                                                                                                                                                                                                                                                                                                                                                                                                                                                                                                                                |
| Secondary Subject Heading:      | Epidemiology                                                                                                                                                                                                                                                                                                                                                                                                                                                                                                                                                                                                                                                                                                                                                                                                                                                                                                                                                                                                                                 |
| Keywords:                       | ambient temperatures, attributable fraction, attributable number, mortality, effect modification                                                                                                                                                                                                                                                                                                                                                                                                                                                                                                                                                                                                                                                                                                                                                                                                                                                                                                                                             |
|                                 |                                                                                                                                                                                                                                                                                                                                                                                                                                                                                                                                                                                                                                                                                                                                                                                                                                                                                                                                                                                                                                              |

SCHOLARONE™  
Manuscripts

1  
2  
3  
4 **1 Burden of non-accidental mortality attributable to ambient**  
5  
6 **2 temperatures: a time-series study in a high plateau area of**  
7  
8 **3 southwest China**  
9

10  
11  
12 5 Changyu Deng <sup>a,1</sup>, Zan Ding <sup>b,1</sup>, Liujiu Li <sup>c</sup>, Yanfang Wang <sup>c</sup>, Pi Guo <sup>a</sup>, Shaoyi Yang <sup>a</sup>,  
13  
14 6 Ju Liu <sup>a</sup>, Yue Wang <sup>a</sup>, Qingying Zhang <sup>a,\*</sup>  
15

16  
17 8 <sup>a</sup> Department of Preventive Medicine, Shantou University Medical College, Shantou,  
18  
19 9 Guangdong 515041, China

20  
21 10 <sup>b</sup> The Institute of Metabolic Diseases, Baoan Central Hospital of Shenzhen, the Fifth  
22  
23 11 Affiliated Hospital of Shenzhen University, Shenzhen, Guangdong 518102, China

24  
25 12 <sup>c</sup> Yuxi Center for Disease Control and Prevention, Yuxi, Yunnan 653000, China  
26

27  
28 14 <sup>1</sup> These authors contributed equally to this work (Changyu Deng, Zan Ding).  
29

30  
31 15 \* Correspondence to: Department of Preventive Medicine, Shantou University  
32  
33 16 Medical College, Shantou, Guangdong 515041, China. E-mail: qyzhang@stu.edu.cn  
34  
35 17 (Q. Zhang).  
36  
37  
38  
39  
40  
41  
42  
43  
44  
45  
46  
47  
48  
49  
50  
51  
52  
53  
54  
55  
56  
57  
58  
59  
60

## 1 **Abstract**

2 *Objective:* To examine the total non-accidental mortality burden attributable to  
3 ambient temperatures and assess the effect modification of the burden by specific  
4 causes of death and individual characteristics in a high plateau area in southwest  
5 China.

6 *Methods:* Using daily mortality and meteorological data from 2009 to 2016, we  
7 applied a quasi-Poisson model combined with a distributed lag non-linear model to  
8 estimate the temperature–mortality association with the assessment of attributable  
9 fraction and number. We calculated attributable fractions and deaths with 95%  
10 empirical confidence intervals (eCIs), that were due to cold and heat, defined as  
11 temperatures below and above the median temperature, and for mild and extreme  
12 temperatures, defined by cutoffs at the 2.5th and 97.5th temperature percentiles.

13 *Results:* We analyzed 89,467 non-accidental deaths; 4,131 were attributable to overall  
14 temperatures, with an attributable fraction of 4.75% (95% eCI 2.33, 6.79). Most of the  
15 mortality burden was caused by cold (4.08%; 0.86, 7.12), while the burden due to heat  
16 was low and non-significant (0.67%; -2.44, 3.64). Extreme cold (1.17%; 0.58, 1.69)  
17 was responsible for 24.6% (i.e., 1.17% divided by 4.75%) of the total death burden. In  
18 the stratification analyses, attributable risk due to cold was higher for cardiovascular  
19 than respiratory disease (6.18% vs 3.50%). We found a trend of risk of increased  
20 death due to ambient temperatures with increasing age, with attributable fractions of  
21 1.83%, 2.27%, and 6.87% for age  $\leq 64$ , 65 – 74, and  $\geq 75$  years old. The cold-related  
22 burden was slightly greater for females, farmers, ethnic minorities, and non-married  
23 individuals than their corresponding categories.

24 *Conclusions:* Most of the burden of death was attributable to cold, and specific causes  
25 and individual characteristics might modify the mortality burden attributable to  
26 ambient temperatures. The results may help make prevention measures to confront  
27 climate change for susceptible population in this region.

28 *Key words:* ambient temperatures; attributable fraction; attributable number; mortality;  
29 effect modification

## 30 **Strengths and limitations of this study**

- 31 • Mortality burden attributable to ambient temperature was assessed in a high  
32 plateau city in southwest China.

- 1 • To our knowledge, this study evaluated the mortality burden attributable to  
2 ambient temperature, and quantified its effect modification by national minority and  
3 occupation for the first time.
- 4 • The data only come from one city, so it should be cautious to generalize the  
5 findings to other geographic areas or climates.
- 6 • We used the data on temperature from monitoring sites rather than measuring  
7 individual exposure, which may bring about measurement errors.

## 9 1. Introduction

10 With the global climate change, ambient temperatures has been extensively  
11 demonstrated to directly affect human health (e.g., daily morbidity and mortality) and  
12 has become one of the most severe public health problems in the world.[1-5]  
13 Exposure to extreme weather such as cold spells and heat waves represents high risk  
14 for mortality, and the extreme temperature-related mortality is expected to increase  
15 with the increasing frequency, intensity, and duration of extreme weather events.[4,6-  
16 8] Low and high temperatures are also well known to be associated with a substantial  
17 increase in a wide range of all-cause and cause-specific mortality (e.g., cardiovascular  
18 and respiratory diseases).[6,9-12]

19 Numerous epidemiological studies have widely used ratio measures (e.g., odds  
20 ratio, relative ratio, or rate ratio) to quantify the relationships between ambient  
21 temperatures and human health, but these offer limited information on the excess  
22 burden and actual impact of ambient temperatures.[13-16] Relative excess measures  
23 (e.g., attributable fraction) and absolute excess measures (e.g., attributable number),  
24 calculated on the basis of the estimated relative risk, have been pointed out to provide  
25 better scientific evidence for estimating the potential benefits of preventative  
26 measures, public health interventions, and resource allocation.[11,17,18] The  
27 attributable fraction and number represent the fraction and number of cases or deaths  
28 from a cause-specific disease that would be prevented without exposure to a specific  
29 risk factor, which has important implications for policy making and the potential  
30 impact of interventions.[19-21]

31 Use of risk assessment of the attributable fraction revealed the burden of  
32 mortality associated with ambient temperatures; however, most previous literatures  
33 estimated the mortality burden in high-income or low-altitude regions or



1 coastlands,[11,17,20,22-24] and few were conducted in high plateau areas of  
2 developing countries.[12,25] The attributable fraction and number for the  
3 temperature–mortality association may vary by geographic features, climate, and  
4 structure of the population.[25,26] In addition, age, gender, educational attainment,  
5 and specific causes were previously identified as modifiers for estimating the effect  
6 modification of the mortality risk attributable to ambient temperatures.[27-31]  
7 However, few researchers have focused on the potential effect modification of the  
8 mortality burden by occupation, race/ethnicity, or marital status.[32]

9 Yuxi city is located in a high-altitude area in southwest China and experiences a  
10 unique, subtropical, plateau monsoon climate. More than 70% of indigenous people in  
11 this multi-ethnic region engage in agricultural production. The aim of this current  
12 ecological dissertation in Yuxi was to quantify the burden of non-accidental mortality  
13 attributable to ambient temperatures. We aimed to separate the contribution of  
14 temperature to mortality by heat and cold and mild and extreme temperatures by using  
15 attributable fraction and number, based on a proposed framework of attributable risk  
16 assessment within a distributed lag non-linear model (DLNM). A more in-depth  
17 purpose was to comprehensively assess the effect modification of the non-accidental  
18 mortality burden attributable to ambient temperatures by specific mortality causes (i.e.,  
19 cardiovascular, heart, stroke, and respiratory diseases) and individual characteristics  
20 (i.e., age, gender, occupation, ethnicity, and marital status).

## 22 **2. Methods**

### 23 **2.1 Study site**

24 Located on the western edge of the Yunnan-Guizhou Plateau of southwest China,  
25 the Yuxi city area has complicated geographic features of mountains, valleys, plateaus,  
26 and basins. With an average altitude of about 2000m and 4 spring-like seasons, this  
27 area has a unique, subtropical, plateau monsoon climate, showing diversified climates  
28 with low atmospheric pressure, thin and dry air, and a stable daily mean temperature  
29 but large temperature difference between day and night, morning or evening and  
30 daytime, indoor and outdoor. From the national population census in 2010, the  
31 permanent population is about 2.3 billion, and residents of ethnic minorities (e.g., Dai,  
32 Hui, Yi, Hani, and Mongolian minorities) account for 32.27% of the total population.

### 33 **2.2 Data collection**

1  
2  
3 1 Individual records such as age of death, gender, ethnicity, occupation, marital  
4 2 status, cause of death, and date of death for all registered deaths for the period January  
5 3 1, 2009 to May 31, 2016, were obtained from the Yuxi Center for Disease Control and  
6 4 Prevention, which maintains detailed quality assurance and control measures[33,34].  
7 5 The underlying causes of death were classified by medical personnel, and  
8 6 examination procedures were routinely performed to ensure accurate data, based on  
9 7 the *International Classification of Diseases*, 10th revision (ICD-10). Individual data  
10 8 were collapsed into a series of daily counts for the total non-accidental mortality  
11 9 (ICD-10 A00–R99) as well as subcategories by specific cause of death  
12 10 (cardiovascular [I00–I99], heart [I00–I51], stroke [I60–I69], and respiratory disease  
13 11 [J00–J99]), age (0–64, 65–74, and 75+ years old), gender (male and female),  
14 12 occupation (farmer and non-farmer), ethnicity (Han nationality and ethnic minorities),  
15 13 and marital status (married and non-married). Daily meteorological data for the same  
16 14 period were obtained from the China Meteorological Data Sharing System, including  
17 15 mean temperature and 4 other meteorological variables (atmospheric pressure, wind  
18 16 speed, sunshine duration, and relative humidity).

### 17 18 **2.3 Patient and public involvement**

19 This study is based on daily death number data, which could be obtained from  
20 Yuxi Center for Disease Control and Prevention without referral and free of charge.  
21 There was no patient and decedent involvement in the presented study.

### 22 23 **2.4 Statistical analysis**

24 As daily death number under a Poisson distribution and risk of mortality depend  
25 on exposure to temperatures of the current and previous days,[25] we applied a  
26 standard time-series quasi-Poisson regression model combined with DLNM to  
27 estimate the non-linear and lag effects of mean temperature on mortality, with day of  
28 the week, long-term trends, and the 4 other meteorological variables as potential  
29 covariates. This model can capture the complex non-linear relation and lagged effect  
30 by combining 2 functions that define the conventional exposure–response association  
31 and the additional lag–response association. The maximum lag period was set to 28  
32 days to explore the lag structure of temperature effect, and median temperature  
33 (17.0°C) was the reference to calculate attributable risk.[32] We used natural cubic  
34 splines with 7 degrees of freedom (*df*) per year for time to describe the long-term

1 trends and seasonality and 3 *df* for the 4 other meteorological indicators. These model  
 2 specifications were consistent with previous studies.[24,35]

3 The total mortality burden attributable to non-reference temperatures can be  
 4 assessed in terms of fraction and number of deaths, and the attributable number can be  
 5 obtained from the sum of the contributions from all days in the series; its ratio with  
 6 total number of deaths produces the total attributable fraction.[19] The overall  
 7 cumulative relative risk corresponding to each day's temperature was used to compute  
 8 the attributable fraction and number:

$$AF_{x,t} = 1 - \exp \left[ - \sum_{l=0}^L \beta_{x_{t-l}} \right]$$

$$AN_{x,t} = AF_{x,t} \times n_t$$

9 where  $AF_{x,t}$  and  $AD_{x,t}$  are the attributable fraction and the number of cases at day  $t$   
 10 (1,2,3...2907), respectively;  $\beta_x$  is the risk associated with the exposure to ambient  
 11 temperatures at level  $x$  (i.e.,  $\beta_x = (x - Ref) \times \beta$ ; *Ref* is the referenced temperature;  
 12  $\beta$  is the coefficient for DLNM of mean temperature;  $L$  is the maximum lag for the  
 13 effect of mean temperature; and  $n_t$  is the observed number of deaths at day  $t$ .

14 To estimate the mortality burden from non-accidental deaths, we calculated the  
 15 total attributable fraction due to the overall temperatures and divided the total effect  
 16 into exposure to low and high temperatures by summing the subsets corresponding to  
 17 days with temperatures below and above the median temperature. Also, we explored  
 18 the mortality burden attributable to mild and extreme temperatures. Extreme cold and  
 19 heat were defined as temperatures below the 2.5<sup>th</sup> percentile (5.4°C) and above the  
 20 97.5<sup>th</sup> percentile (23.1°C) of mean temperature, and mild cold and heat were defined  
 21 as the range between the median temperature and these cutoffs. Monte-Carlo  
 22 simulations were used to calculate the empirical confidence intervals (eCIs) of the  
 23 attributable fraction and number, assuming a multivariate normal distribution of the  
 24 best linear unbiased predictions of the deduced coefficients[19,36]. All statistical  
 25 analyses involved use of R v3.0.3, with the “dlnm” package to create the DLNM for  
 26 mean temperature.

### 27 3. Results

#### 28 3.1 Descriptive statistics

1 We analyzed 89,467 non-accidental deaths from Yuxi between 2009 and 2016,  
2 with an average of 33 deaths per day (range 12 to 72). The number of deaths due to  
3 cardiovascular disease was 41,794 (46.7%), more than half due to stroke; the  
4 proportion due to respiratory disease was 18.5% (Table 1). In individual  
5 characteristics subgroup, a higher proportion of deaths were for males, older people  
6 ( $\geq 75$  years), people with Han nationality, farmers and married people than their  
7 corresponding categories. During the study period, the mean daily temperature was  
8 16.1 °C (ranging from -3.3 to 25.6 °C) (Table S1). The daily number of non-  
9 accidental deaths and mean temperature showed an inverse relation (Figure 1).

### 10 **3.2 Exposure–response association**

11 The overall effect of mean temperature on mortality (i.e., the total non-accidental  
12 deaths and by specified causes and individual characteristics) for lag 0–28 days and  
13 mean daily temperature distribution are presented in Figure 2. In general, the  
14 temperature–mortality associations were nonlinear and followed slide-shaped curves:  
15 the risks due to heat (both mild and extreme) were low and changed slightly  
16 (approximately 1), whereas the risks due to mild cold and especially extreme cold  
17 were increased. The relative risks rapidly increased with decreasing mean temperature.  
18 The distribution of mean daily temperature was skewed to the left.

### 19 **3.3 Attributable fraction and number**

20 Table 2 shows the estimated attributable fraction with 95% eCIs of daily non-  
21 accidental mortality calculated for total and separate components by heat and cold  
22 temperatures. For total non-accidental deaths, the attributable fraction was 4.75%  
23 (95% eCI 2.33, 6.79) with the whole temperature range, including heat and cold. Cold  
24 temperature was responsible for most of the mortality burden, corresponding to an  
25 attributable risk of 4.08% (0.86, 7.12), whereas the burden due to heat was low and  
26 non-significant (0.67%; -2.44, 3.64). The attributable risks of cardiovascular and  
27 stroke deaths caused by overall temperatures were 5.97% (2.74, 8.74) and 6.50%  
28 (2.22, 10.16); the point-estimated risk due to cold was higher for cardiovascular than  
29 respiratory deaths (6.18% vs 3.50%).

30 On stratification by age, the attributable risk due to ambient temperatures  
31 increased with age, with attributable fractions of 1.83%, 2.27%, and 6.87% for age  
32  $\leq 64$ , 65–74, and  $\geq 75$  years, respectively. Those engaged in agriculture had higher  
33 attributable fraction, 3.23 times (5.66% vs 1.75%) due to the overall temperatures and  
34 3.98 times (4.93% vs 1.24%) due to cold, than non-farmers. The estimated burden due

1 to cold was 2.35-fold higher for ethnic minorities than Han nationality (6.55% vs  
2 2.79%), whereas the point-estimated attributable fraction caused by the whole  
3 temperature range was approximately equal by gender and marital status.

4 Table 3 displays the estimated mortality fraction attributable to overall  
5 temperatures, separated by mild and extreme temperatures. In general, the risk of non-  
6 accidental deaths attributable to extreme cold was 1.17% (0.58, 1.69), accounting for  
7 a clearly high proportion of 24.6% of the total mortality burden (4.75%) due to the  
8 whole temperature range, whereas attributable risks due to mild cold or heat or  
9 extreme heat were non-significant. In the cause-specific analyses, the attributable  
10 fractions due to extreme cold were 1.57%, 1.63%, and 1.49% for cardiovascular  
11 disease, stroke, and heart disease, with no significant association with respiratory  
12 disease. The extreme cold-related burden for older people, females, farmers, and non-  
13 married individuals was slightly higher than their corresponding categories.

14 Table S2 presents the attributable number of deaths due to mean temperature,  
15 overall and by cold and heat. An estimated 4,131 non-accidental deaths were due to  
16 overall temperatures and 3,482 to cold. Table S3 shows the excess mortality due to  
17 extreme and mild cold and mild and extreme heat. Figures 3 and S1 illustrate the daily  
18 deaths attributable to cold and heat. The attributable deaths were much larger with  
19 cold than heat.

### 20 3.4 Sensitivity analysis

21 Sensitivity analysis to check the stability of our main findings involved changing  
22 the maximum lag days (7, 14, and 21) and the *df* of the natural cubic splines for the  
23 calendar time (5, 6, 8, and 9 per year) and for the 4 other meteorological variables one  
24 by one (2, 4, and 5). The attributable fractions for non-accidental mortality due to  
25 overall temperatures were relatively robust with sensitivity analyses (Table S4) and  
26 the results by causes of deaths and individual characteristics were robust (results not  
27 shown).

## 29 4. Discussion

30 We quantitatively estimated the attributable risks of non-accidental death and  
31 subgroups by specific causes and individual characteristics due to the whole  
32 temperature range and to extreme and mild cold and mild and extreme heat for 89,467  
33 deaths between 2009 and 2016 in Yuxi, China, a high-altitude region with a unique,

1  
2  
3 1 subtropical, plateau monsoon climate. The temperature–mortality associations were  
4 2 nonlinear and followed slide-shaped curves, and the risks rapidly increased with  
5 3 decreasing mean temperature. Excess deaths were attributable to overall temperatures,  
6 4 and cold was responsible for most of the mortality burden. The estimated mortality  
7 5 burden attributable to cold was greater for cardiovascular deaths, older people,  
8 6 farmers, ethnic minorities, and non-married individuals than their corresponding  
9 7 categories.

10 8 Inconsistent with previous ecological evidences that the temperature–mortality  
11 9 associations were “U” or “V” shaped curve, with increased mortality risks at  
12 10 extremely low and high temperatures [26,37-39], a slide-shaped curve was captured in  
13 11 our study, which shows increased relative risk with low temperature, especially  
14 12 extreme cold but the risk of high temperature changed minimally. The different  
15 13 pattern of temperature–mortality associations might attribute to the unique climate in  
16 14 this high-altitude region. Yuxi city has a distinct subtropical plateau monsoon climate,  
17 15 with four spring-like seasons year round, giving the city a stable daily mean  
18 16 temperature but large temperature difference between day and night, morning or  
19 17 evening and daytime, indoor and outdoor. Although the city has a stable daily mean  
20 18 temperature of  $16.1 \pm 4.9^{\circ}\text{C}$  full year, the daily diurnal temperature range was  
21 19 averaging  $10.4^{\circ}\text{C}$  (ranging from  $1.1^{\circ}\text{C}$  to  $21.7^{\circ}\text{C}$ ). Furthermore, We also examined  
22 20 additional non-accidental deaths attributable to ambient temperatures, with larger  
23 21 burden due to cold than heat. A multi-country observational study estimated a total  
24 22 mortality burden of death attributable to non-optimal ambient temperatures; the  
25 23 attributable fraction ranged from 3.37% in Thailand to 11% in China, which provides  
26 24 strong evidence for substantial differences between regions or climates.[17]

27 25 The cold-related mortality burden is an important public health problem in Yuxi.  
28 26 Findings from our study showed most of the death burden attributable to low  
29 27 temperature, and a much lower and non-significant burden due to heat, which might  
30 28 be owing to unique climatic condition that the differences between minimum and  
31 29 referent temperature was  $20.3^{\circ}\text{C}$  ( $-3.3^{\circ}\text{C}$  vs  $17.0^{\circ}\text{C}$ ), while those between referent and  
32 30 maximum temperature was  $8.6^{\circ}\text{C}$  ( $17.0^{\circ}\text{C}$  vs  $25.6^{\circ}\text{C}$ ). Previous studies have found  
33 31 that most of the mortality burden is caused by exposure to cold days, with  
34 32 comparatively lower attributable risk, or even none, due to heat exposure. For  
35 33 example, Hajat et al. (2006) showed that all-cause mortality attributable to heat  
36 34 ranged from 0.37% in London (1976–2003) to 1.45% in Milan (1985–2002), and



1 another study conducted in London from 1986 to 1996 found that attributable fraction  
2 of mortality for each 1°C decrease below a threshold of 15°C was 5.42% (4.13, 6.69),  
3 with no burden due to heat.[40] Although extremely low or high temperature  
4 corresponded to increased relative risk of mortality, Gasparrini et al. (2015) found a  
5 relatively small part of the death burden attributable to extreme cold temperature,  
6 ranging from 0.25% to 1.06%. Similar results from 5 East Asian regions showed a  
7 9.36% mortality burden attributable to overall temperatures, with only 0.80% due to  
8 extreme cold [20]. However, our current study estimated a larger proportion of  
9 attributable mortality fraction due to extreme cold, accounting for about one-quarter  
10 of the total mortality burden (1.17% vs 4.75%), even though extreme cold days  
11 represented only 2.5% of the whole study period. We found no evidence of additional  
12 deaths due to extreme heat in all categories.

13 Exposure to low temperature has been widely demonstrated to be strongly  
14 associated with excess cardiovascular and respiratory deaths,[20,31,41,42] and the  
15 biological processes that underlie cold-related mortality are associated with cardio-  
16 respiratory disease.[11,17,31,43] We found a higher point-estimated attributable risk  
17 caused by cold for cardiovascular than respiratory disease deaths. A multi-city study  
18 including 15 Chinese megacities also identified 15.8% of the cardiovascular mortality  
19 burden due to cold days.[26] The increased cold-related cardiovascular deaths mainly  
20 involved changes in vascular tone, autonomic nervous system response, arrhythmia,  
21 and oxidative stress.[44-46] Although we found no evidence for excess burden of  
22 respiratory deaths due to cold or heat, other reports have described increased  
23 respiratory deaths attributable to ambient temperatures.[10,47] For heart and stroke,  
24 the burden of mortality was attributable to only extreme cold, with approximately  
25 equivalent values, and other studies found excess heart and stroke deaths attributable  
26 to low and/or high temperatures.[24,27,41,48]

27 Age has been frequently identified as an important modifier of the association  
28 between ambient temperatures and human health.[15,26,30,49] We found that  
29 exposure to cold, particularly extreme cold, was closely related to increased death  
30 burden for older than younger people. Several previous surveys found increased age  
31 associated with point-estimated attributable risk of cardiovascular mortality and both  
32 intra-cerebral hemorrhage and ischemic stroke morbidity due to cold, with the highest  
33 values in older people.[26,32] Another nationwide study in Japan found most of the  
34 proportion of morbidity burden attributable to days with low temperature in all age



1 groups, with an trend of increasing attributable risk with age: the attributable fraction  
2 due to cold was 15.96%, 24.84%, and 28.10% with age 18–64, 65–74, and 75–110  
3 years, respectively.[37] Older people were more vulnerable to the temperature effects,  
4 mainly because they often have multiple pre-existing chronic conditions and  
5 physiological changes in thermoregulation and homoeostasis.[50,51] However, the  
6 effect modification of temperature-related mortality by gender has been  
7 identified.[24,30,37,52] We observed a higher mortality burden caused by exposure to  
8 the cold period among females than males in Yuxi, and the cold-related attributable  
9 risk was found higher for females than males in Hanoi, Vietnam,[53] and in 47 cities  
10 in Japan.[37] The reason for the discrepancy in temperature-related burden by gender  
11 might be owing to differences in occupational exposure, physiology and  
12 thermoregulation.

13 A survey in Adelaide, South Australia, provided epidemiological evidence for  
14 the impact of heat waves on worker health and safety, which implied that personal  
15 occupation might modify the temperature–mortality association.[54] Our previous  
16 studies (Ding et al., 2016a, 2016b) revealed that farmers were more likely than non-  
17 farmers to die on high DTR or cold days, and the present study also showed a higher  
18 mortality burden attributable to cold and extreme cold days for farmers than non-  
19 farmers. In southwestern China, farmers universally have a poor educational level,  
20 disadvantaged socioeconomic status, and low annual income, which may be linked to  
21 poor living conditions, malnutrition, and non-access to basic health care. In addition,  
22 farmers working in the fields may have more exposure to ambient temperatures,  
23 because farming is basically highly related to weather.[55]

24 A study of 9 cities in California found that with each 10°F (4.7°C) increase in  
25 mean temperature, the mortality was increased 4.9%, 2.5%, and 1.8% for Blacks,  
26 Whites, and Hispanics, respectively.[30] Also, our previous research demonstrated  
27 less risk of high DTR associated with non-accidental mortality for the current day for  
28 people of Dai ethnic minority than Han nationality.[13] To our knowledge, no study  
29 has estimated the potential effect modification of mortality burden attributable to  
30 ambient temperatures by ethnicity. We observed a greater cold- and mild cold-related  
31 death for ethnic minorities than Han nationality in Yuxi, which indicated that  
32 race/ethnicity may modify the cold-associated mortality burden. We also found lower  
33 death burden caused by cold and extreme cold for married people versus those never

1 married, divorced, or widowed, possibly because married people can be cared for by  
2 their partners during the cold period.

3 Our study has some limitations. First, the data were from a single city, so  
4 generalizing the findings to other geographic areas or climates should be cautioned.  
5 Second, the data of temperature were from monitoring sites rather than exposure  
6 measuring of individual. Third, although the concentration of daily mean PM<sub>10</sub>, NO<sub>2</sub>  
7 and SO<sub>2</sub> in Yuxi are much lower than those in other 17 Chinese cities [56], we did not  
8 control for the potential confounding effects by air pollution due to the unavailability  
9 of the complete pollution data in the study area. Last, in the previous multi-country or  
10 multicenter studies [5,26], MMT was reasonably used to assess the temperature–  
11 mortality associations due to each site corresponding to a MMT. However,  
12 inconsistent with those previous studies, our study only involved one city with median  
13 temperature as common referent value, which might lead the results incomparable  
14 with previous studies. Sensitive analysis with the MMT as referent temperature  
15 showed that all of the results were stable substantially when compared to the results  
16 estimated by median temperature. But the MMT differed among the sub-groups,  
17 which leded the incomparable results in one city (Table S5).

## 18 **5. Conclusions**

19 Our study conducted in a high plateau city in southwest China found that most of  
20 the death burden attributable to cold temperature. Our study may have implications  
21 for both the research domain and public health policy arena, which may help  
22 policymakers develop intervention strategies to minimize the health effects due to  
23 adverse temperatures and predict the climate-change impact in this region. Local  
24 residents, especially the vulnerable populations such as older people and farmers,  
25 need to strengthen their awareness of cold exposure, such as the adaptation of houses  
26 (e.g., using the air conditioning systems), spending less time outdoors or wearing  
27 more clothing when the temperature drops.

## 28 **Declarations**

29 **Contributors:** Q.Y.Z., Z.D., and C.Y.D. conceived and designed the experiments.  
30 L.J.L. and Y.F.W. provide primary data. P.G., S.Y.Y., J.L., Y.W., and C.Y.D.  
31 collected and cleaned the data. C.Y.D. analyzed the data and drafted the manuscript.  
32

1 Q.Y.Z., Z.D., and C.Y.D. revised the manuscript and interpreted the results. All  
2 authors read and approved the final manuscript.

3  
4 **Funding:** This study was supported by the Department of Education, Guangdong  
5 Government under the Top-tier University Development Scheme for Research and  
6 Control of Infectious Diseases (2016016), the National Natural Science Foundation of  
7 China (No. 81703323), National key R & D program of China (2016YFC1304000),  
8 and the Scientific Research Program of Health Bureau of Yuxi City (2014).

9  
10 **Competing interests:** The authors declare no competing financial interests.

11  
12 **Data sharing statement:** Please contact the corresponding author for data requests.

## 1 **References:**

- 1 1. Watts N, Adger WN, Agnolucci P, Blackstock J, Byass P, et al. (2015) Health and  
2 climate change: policy responses to protect public health. *Lancet* 386: 1861-  
3 1914.
- 4 2. Lee JY, Kim H (2016) Projection of future temperature-related mortality due to  
5 climate and demographic changes. *Environ Int* 94: 489-494.
- 6 3. Zhan Z, Zhao Y, Pang S, Zhong X, Wu C, et al. (2017) Temperature change  
7 between neighboring days and mortality in United States: A nationwide study.  
8 *Science of the Total Environment* 584.
- 9 4. Song X, Wang S, Hu Y, Yue M, Zhang T, et al. (2017) Impact of ambient  
10 temperature on morbidity and mortality: An overview of reviews. *Sci Total*  
11 *Environ* 586: 241-254.
- 12 5. Gasparrini A, Guo Y, Hashizume M, Lavigne E, Zanobetti A, et al. (2015) Mortality  
13 risk attributable to high and low ambient temperature: a multicountry  
14 observational study. *Lancet* 386: 369-375.
- 15 6. Rytty NR, Guo Y, Jaakkola JJ (2016) Global Association of Cold Spells and Adverse  
16 Health Effects: A Systematic Review and Meta-Analysis. *Environ Health*  
17 *Perspect* 124: 12-22.
- 18 7. Guo Y, Gasparrini A, Armstrong BG, Tawatsupa B, Tobias A, et al. (2017) Heat  
19 Wave and Mortality: A Multicountry, Multicommunity Study. *Environ Health*  
20 *Perspect* 125: 087006.
- 21 8. Hajat S, Armstrong B, Baccini M, Biggeri A, Bisanti L, et al. (2006) Impact of high  
22 temperatures on mortality: is there an added heat wave effect? *Epidemiology*  
23 *17*: 632-638.
- 24 9. Analitis A, Katsouyanni K, Biggeri A, Baccini M, Forsberg B, et al. (2008) Effects of  
25 cold weather on mortality: results from 15 European cities within the PHEWE  
26 project. *Am J Epidemiol* 168: 1397-1408.
- 27 10. Cui Y, Yin F, Deng Y, Volinn E, Chen F, et al. (2016) Heat or Cold: Which One  
28 Exerts Greater Deleterious Effects on Health in a Basin Climate City? Impact  
29 of Ambient Temperature on Mortality in Chengdu, China. *Int J Environ Res*  
30 *Public Health* 13.
- 31 11. Tian L, Qiu H, Sun S, Lin H (2016) Emergency Cardiovascular Hospitalizations  
32 Risk Attributable to Cold Temperatures in Hong Kong. *Circulation*  
33 *Cardiovascular Quality & Outcomes* 9: CIRCOUTCOMES.115.002410.
- 34 12. Ma W, Wang L, Lin H, Liu T, Zhang Y, et al. (2015) The temperature-mortality  
35 relationship in China: An analysis from 66 Chinese communities. *Environ Res*  
36 *137*: 72-77.
- 37 13. Ding Z, Li L, Xin L, Pi F, Dong W, et al. (2016) High diurnal temperature range  
38 and mortality: Effect modification by individual characteristics and mortality  
39 causes in a case-only analysis. *Sci Total Environ* 544: 627-634.
- 40 14. Zanobetti A, O'Neill MS, Gronlund CJ, Schwartz JD (2013) Susceptibility to  
41 mortality in weather extremes: effect modification by personal and small-area  
42 characteristics. *Epidemiology* 24: 809-819.
- 43 15. Basagana X, Sartini C, Barrera-Gomez J, Dadvand P, Cunillera J, et al. (2011)  
44 Heat waves and cause-specific mortality at all ages. *Epidemiology* 22: 765-  
45 772.
- 46 16. Lin H, Liu T, Xiao J, Zeng W, Li X, et al. (2016) Mortality burden of ambient fine  
47 particulate air pollution in six Chinese cities: Results from the Pearl River  
48 Delta study. *Environment International* 96: 91-97.
- 49

- 1 17. Gasparrini A, Guo Y, Hashizume M, Lavigne E, Zanobetti A, et al. (2015) Mortality  
2 risk attributable to high and low ambient temperature: a multicountry  
3 observational study. *The Lancet* 386: 369-375.
- 4 18. Steenland K, Armstrong B (2006) An Overview of Methods for Calculating the  
5 Burden of Disease Due to Specific Risk Factors. *Epidemiology* 17: 512.
- 6 19. Gasparrini A, Leone M (2014) Attributable risk from distributed lag models. *BMC*  
7 *Med Res Methodol* 14: 55.
- 8 20. Lee WH, Lim YH, Dang TN, Seposo X, Honda Y, et al. (2017) An Investigation on  
9 Attributes of Ambient Temperature and Diurnal Temperature Range on  
10 Mortality in Five East-Asian Countries. *Sci Rep* 7: 10207.
- 11 21. Yang J, Zhou M, Ou CQ, Yin P, Li M, et al. (2017) Seasonal variations of  
12 temperature-related mortality burden from cardiovascular disease and  
13 myocardial infarction in China. *Environ Pollut* 224: 400-406.
- 14 22. Chung Y, Lim YH, Honda Y, Guo YL, Hashizume M, et al. (2015) Mortality related  
15 to extreme temperature for 15 cities in northeast Asia. *Epidemiology* 26: 255-  
16 262.
- 17 23. Guo Y, Gasparrini A, Armstrong B, Li S, Tawatsupa B, et al. (2014) Global  
18 variation in the effects of ambient temperature on mortality: a systematic  
19 evaluation. *Epidemiology* 25: 781-789.
- 20 24. Yang J, Yin P, Zhou M, Ou CQ, Li M, et al. (2016) The burden of stroke mortality  
21 attributable to cold and hot ambient temperatures: Epidemiological evidence  
22 from China. *Environ Int* 92-93: 232-238.
- 23 25. Wang C, Zhang Z, Zhou M, Zhang L, Yin P, et al. (2017) Nonlinear relationship  
24 between extreme temperature and mortality in different temperature zones:  
25 A systematic study of 122 communities across the mainland of China. *Science*  
26 *of the Total Environment* 586: 96-106.
- 27 26. Yang J, Yin P, Zhou M, Ou CQ, Guo Y, et al. (2015) Cardiovascular mortality risk  
28 attributable to ambient temperature in China. *Heart* 101: 1966-1972.
- 29 27. Group TE (1997) Cold exposure and winter mortality from ischaemic heart  
30 disease, cerebrovascular disease, respiratory disease, and all causes in warm  
31 and cold regions of Europe. The Eurowinter Group. *Lancet* 349: 1341-1346.
- 32 28. Diaz J, Carmona R, Miron IJ, Ortiz C, Linares C (2015) Comparison of the effects  
33 of extreme temperatures on daily mortality in Madrid (Spain), by age group:  
34 The need for a cold wave prevention plan. *Environ Res* 143: 186-191.
- 35 29. Ding Z, Guo P, Xie F, Chu H, Li K, et al. (2015) Impact of diurnal temperature  
36 range on mortality in a high plateau area in southwest China: A time series  
37 analysis. *Sci Total Environ* 526: 358-365.
- 38 30. Basu R, Ostro BD (2008) A multicounty analysis identifying the populations  
39 vulnerable to mortality associated with high ambient temperature in  
40 California. *Am J Epidemiol* 168: 632-637.
- 41 31. Moghadamnia MT, Ardalan A, Mesdaghinia A, Keshtkar A, Naddafi K, et al. (2017)  
42 Ambient temperature and cardiovascular mortality: a systematic review and  
43 meta-analysis. *PeerJ* 5: e3574.
- 44 32. Guo P, Zheng M, Feng W, Wu J, Deng C, et al. (2017) Effects of ambient  
45 temperature on stroke hospital admissions: Results from a time-series  
46 analysis of 104,432 strokes in Guangzhou, China. *Sci Total Environ* 580: 307-  
47 315.
- 48 33. Ma W, Zeng W, Zhou M, Wang L, Rutherford S, et al. (2015) The short-term  
49 effect of heat waves on mortality and its modifiers in China: An analysis from  
50 66 communities. *Environment International* 75: 103-109.

- 1  
2  
3  
4  
5  
6  
7  
8  
9  
10  
11  
12  
13  
14  
15  
16  
17  
18  
19  
20  
21  
22  
23  
24  
25  
26  
27  
28  
29  
30  
31  
32  
33  
34  
35  
36  
37  
38  
39  
40  
41  
42  
43  
44  
45  
46  
47  
48  
49  
50  
51  
52
- 1 34. Lin H, Ratnapradipa K, Wang X, Zhang Y, Xu Y, et al. (2017) Hourly peak  
2 concentration measuring the PM 2.5 -mortality association: Results from six  
3 cities in the Pearl River Delta study. *Atmospheric Environment*.  
4  
5 35. Ding Z, Li L, Wei R, Dong W, Guo P, et al. (2016) Association of cold temperature  
6 and mortality and effect modification in the subtropical plateau monsoon  
7 climate of Yuxi, China. *Environ Res* 150: 431-437.  
8  
9 36. Greenland S (2004) Interval estimation by simulation as an alternative to and  
10 extension of confidence intervals. *Int J Epidemiol* 33: 1389-1397.  
11  
12 37. Onozuka D, Hagihara A (2017) Out-of-hospital cardiac arrest risk attributable to  
13 temperature in Japan. *Sci Rep* 7: 39538.  
14  
15 38. Wang X, Li G, Liu L, Westerdahl D, Jin X, et al. (2015) Effects of Extreme  
16 Temperatures on Cause-Specific Cardiovascular Mortality in China. *Int J*  
17 *Environ Res Public Health* 12: 16136-16156.  
18  
19 39. Yan C, Fei Y, Ying D, Volinn E, Fei C, et al. (2016) Heat or Cold: Which One  
20 Exerts Greater Deleterious Effects on Health in a Basin Climate City? Impact  
21 of Ambient Temperature on Mortality in Chengdu, China. *International*  
22 *Journal of Environmental Research & Public Health* 13: 1225.  
23  
24 40. Carson C, Hajat S, Armstrong B, Wilkinson P (2006) Declining vulnerability to  
25 temperature-related mortality in London over the 20th century. *Am J*  
26 *Epidemiol* 164: 77-84.  
27  
28 41. Breitner S, Wolf K, Peters A, Schneider A (2014) Short-term effects of air  
29 temperature on cause-specific cardiovascular mortality in Bavaria, Germany.  
30 *Heart* 100: 1272-1280.  
31  
32 42. Braga AL, Zanobetti A, Schwartz J (2002) The effect of weather on respiratory  
33 and cardiovascular deaths in 12 U.S. cities. *Environ Health Perspect* 110: 859-  
34 863.  
35  
36 43. Medina-Ramon M, Zanobetti A, Cavanagh DP, Schwartz J (2006) Extreme  
37 temperatures and mortality: assessing effect modification by personal  
38 characteristics and specific cause of death in a multi-city case-only analysis.  
39 *Environ Health Perspect* 114: 1331-1336.  
40  
41 44. Westfall TC, Yang CL, Chen X, Naes L, Vickery L, et al. (2005) A novel  
42 mechanism prevents the development of hypertension during chronic cold  
43 stress. *Auton Autacoid Pharmacol* 25: 171-177.  
44  
45 45. Luo B, Shi H, Wang L, Shi Y, Wang C, et al. (2014) Rat lung response to PM2.5  
46 exposure under different cold stresses. *Int J Environ Res Public Health* 11:  
47 12915-12926.  
48  
49 46. Tuo B, Li C, Peng L, Ye M, Liu W, et al. (2014) Analysis of differentially expressed  
50 genes in cold-exposed mice to investigate the potential causes of cold-  
51 induced hypertension. *Exp Ther Med* 8: 110-114.  
52  
53 47. Zhang Y, Li C, Feng R, Zhu Y, Kai W, et al. (2016) The Short-Term Effect of  
54 Ambient Temperature on Mortality in Wuhan, China: A Time-Series Study  
55 Using a Distributed Lag Non-Linear Model. *International Journal of*  
56 *Environmental Research & Public Health* 13: 722-734.  
57  
58 48. Gasparrini A, Armstrong B, Kovats S, Wilkinson P (2012) The effect of high  
59 temperatures on cause-specific mortality in England and Wales. *Occup*  
60 *Environ Med* 69: 56-61.  
61  
62 49. Rocklöv J, Ebi K, Forsberg B (2011) Mortality Related to Temperature and  
63 Persistent Extreme Temperatures-A Study of Cause-Specific and Age  
64 Stratified Mortality. *Occupational & Environmental Medicine* 68: 531.  
65  
66 50. Analitis A, Katsouyanni K, Biggeri A, Baccini M, Forsberg B, et al. (2008) Effects  
67 of cold weather on mortality: results from 15 European cities within the  
68 PHEWE project. *American Journal of Epidemiology* 168: 1397-1408.



- 1  
2  
3 1 51. Gasparrini A, Armstrong B, Kovats S, Wilkinson P (2012) The effect of high  
4 2 temperatures on cause-specific mortality in England and Wales. *Occupational  
5 3 & Environmental Medicine* 69: 56.  
6 4  
7 52. Seposo XT, Dang TN, Honda Y (2015) Evaluating the Effects of Temperature on  
8 5 Mortality in Manila City (Philippines) from 2006-2010 Using a Distributed Lag  
9 6 Nonlinear Model. *International Journal of Environmental Research & Public  
10 7 Health* 12: 6842-6857.  
11 8  
12 53. Xuan LTT, Egondi T, Ngoan LT, Toan DTT, Huong LT (2014) Seasonality in  
13 9 mortality and its relationship to temperature among the older population in  
14 10 Hanoi, Vietnam. *Global Health Action* 7: 23115.  
15 11  
16 54. Xiang J, Bi P, Pisaniello D, Hansen A (2014) The impact of heatwaves on workers'  
17 12 health and safety in Adelaide, South Australia. *Environ Res* 133: 90-95.  
18 13  
19 55. Mutekwa VT (2009) Climate change impacts and adaptation in the agricultural  
20 14 sector: the case of smallholder farmers in Zimbabwe. *Journal of Sustainable  
21 15 Development in Africa* 11.  
22 16  
23 56. Chen R, Samoli E, Wong CM, Huang W, Wang Z, et al. (2012) Associations  
24 17 between short-term exposure to nitrogen dioxide and mortality in 17 Chinese  
25 18 cities: the China Air Pollution and Health Effects Study (CAPES). *Environment  
26 19 International* 118: 101-106.  
27 20  
28  
29  
30  
31  
32  
33  
34  
35  
36  
37  
38  
39  
40  
41  
42  
43  
44  
45  
46  
47  
48  
49  
50  
51  
52  
53  
54  
55  
56  
57  
58  
59  
60



**Table 1.** Daily total non-accidental mortality and by specific causes and individual characteristics in Yuxi, China, 2009–2016.

|                      | Total deaths | Min | Median (25 <sup>th</sup> , 75 <sup>th</sup> ) | Max | Mean (SD)  |
|----------------------|--------------|-----|-----------------------------------------------|-----|------------|
| Total non-accidental | 89,467       | 12  | 32 (28, 38)                                   | 72  | 33.0 (7.8) |
| Cause-specific       |              |     |                                               |     |            |
| Cardiovascular       | 41,794       | 2   | 15 (12, 18)                                   | 37  | 15.4 (4.9) |
| Heart                | 17,793       | 0   | 6 (4, 8)                                      | 22  | 6.6 (3.0)  |
| Stroke               | 22,589       | 0   | 8 (6, 10)                                     | 22  | 8.3 (3.3)  |
| Respiratory          | 16,565       | 0   | 6 (4, 8)                                      | 21  | 6.1 (3.1)  |
| Age, years           |              |     |                                               |     |            |
| ≤64                  | 21,678       | 1   | 8 (6, 10)                                     | 19  | 8.0 (2.9)  |
| 65–74                | 20,072       | 0   | 7 (5, 9)                                      | 19  | 7.4 (2.9)  |
| ≥75                  | 47,717       | 4   | 17 (14, 21)                                   | 43  | 17.6 (5.6) |
| Gender               |              |     |                                               |     |            |
| Male                 | 48,939       | 5   | 18 (14, 21)                                   | 43  | 18.1 (5.2) |
| Female               | 40,528       | 2   | 15 (12, 18)                                   | 36  | 15.0 (4.5) |
| Occupation           |              |     |                                               |     |            |
| Farmer               | 68,278       | 0   | 7 (5, 10)                                     | 33  | 7.8 (3.4)  |
| Non-farmer           | 21,189       | 7   | 25 (20, 30)                                   | 57  | 25.2 (7.0) |
| Ethnic               |              |     |                                               |     |            |
| Han nationality      | 63,275       | 6   | 23 (19, 27)                                   | 54  | 23.4 (6.4) |
| Ethnic minorities    | 26,192       | 0   | 9 (7, 12)                                     | 24  | 9.7 (3.6)  |
| Marital status       |              |     |                                               |     |            |
| Married              | 54,971       | 1   | 12 (10, 15)                                   | 32  | 12.7 (4.3) |
| Non-married          | 34,496       | 4   | 20 (16, 24)                                   | 49  | 20.3 (5.5) |

Min, minimum; Max maximum; 25<sup>th</sup>, 25<sup>th</sup> percentile of the distributions; 75<sup>th</sup>, 75<sup>th</sup> percentile of the distributions.

**Table 2.** Attributable fraction (%) of total non-accidental mortality and by specific causes and individual characteristics due to mean daily temperature and cold and heat over lag 0–28 days in Yuxi, China.

|                      | Total (%)                 | Cold (%)                  | Heat (%)            |
|----------------------|---------------------------|---------------------------|---------------------|
| Total non-accidental | <b>4.75 (2.33, 6.79)</b>  | <b>4.08 (0.86, 7.12)</b>  | 0.67 (-2.44, 3.64)  |
| Cause-specific       |                           |                           |                     |
| Cardiovascular       | <b>5.97 (2.74, 8.74)</b>  | <b>6.18 (1.89, 10.31)</b> | -0.21 (-5.04, 4.33) |
| Heart                | 5.25 (-0.40, 9.57)        | 6.48 (-0.70, 12.47)       | -1.23 (-8.59, 5.46) |
| Stroke               | <b>6.50 (2.22, 10.16)</b> | 6.01 (-0.11, 11.41)       | 0.49 (-6.18, 6.15)  |
| Respiratory          | 5.42 (-0.73, 9.71)        | 3.50 (-5.05, 10.95)       | 1.93 (-5.08, 7.90)  |
| Age, years           |                           |                           |                     |
| ≤64                  | 1.83 (-3.15, 5.95)        | 1.75 (-4.64, 7.10)        | 0.08 (-6.64, 5.64)  |
| 65–74                | 2.27 (-2.45, 6.30)        | 3.52 (-3.45, 9.37)        | -1.25 (-7.4, 5.01)  |
| ≥75                  | <b>6.87 (3.68, 9.46)</b>  | <b>5.34 (0.44, 9.38)</b>  | 1.53 (-2.96, 5.09)  |
| Gender               |                           |                           |                     |
| Male                 | <b>4.16 (0.82, 7.04)</b>  | 3.67 (-0.50, 7.72)        | 0.49 (-3.82, 4.31)  |
| Female               | <b>5.54 (2.18, 8.31)</b>  | <b>4.66 (0.03, 9.07)</b>  | 0.89 (-3.21, 5.03)  |
| Occupation           |                           |                           |                     |
| Farmer               | <b>5.66 (3.09, 7.92)</b>  | <b>4.93 (1.28, 8.37)</b>  | 0.73 (-2.7, 3.87)   |
| Non-farmer           | 1.75 (-3.58, 6.11)        | 1.24 (-5.77, 7.61)        | 0.52 (-6.82, 6.55)  |
| Ethnic               |                           |                           |                     |
| Han nationality      | <b>5.38 (2.44, 7.96)</b>  | 2.79 (-1.30, 6.49)        | 2.59 (-0.92, 5.80)  |
| Ethnic minorities    | 2.31 (-1.57, 6.76)        | <b>6.55 (1.15, 11.75)</b> | -4.24 (-10.8, 1.27) |
| Marital status       |                           |                           |                     |
| Married              | <b>4.24 (1.17, 6.99)</b>  | 2.74 (-1.87, 6.53)        | 1.50 (-2.67, 4.83)  |
| Non-married          | <b>5.48 (1.69, 8.56)</b>  | <b>6.10 (1.23, 10.21)</b> | -0.61 (-5.55, 3.95) |

Results are expressed as attributable fractions (95% empirical confidence intervals), and the bold indicates a statistically significant.

**Table 3.** Mortality fraction (%) attributable to extreme and mild cold and mild and extreme heat by specific causes and individual characteristics.

|                      | Extreme cold (%)         | Mild cold (%)            | Mild heat (%)       | Extreme heat (%)    |
|----------------------|--------------------------|--------------------------|---------------------|---------------------|
| Total non-accidental | <b>1.17 (0.58, 1.69)</b> | 3.06 (-0.08, 5.94)       | 0.57 (-2.36, 3.28)  | 0.12 (-0.26, 0.45)  |
| Cause-specific       |                          |                          |                     |                     |
| Cardiovascular       | <b>1.57 (0.81, 2.36)</b> | <b>4.88 (0.55, 8.60)</b> | -0.24 (-4.55, 3.40) | 0.03 (-0.50, 0.51)  |
| Heart                | <b>1.49 (0.23, 2.58)</b> | 5.25 (-1.37, 10.84)      | -1.17 (-7.78, 4.53) | -0.08 (-0.87, 0.64) |
| Stroke               | <b>1.63 (0.60, 2.65)</b> | 4.65 (-1.05, 9.49)       | 0.38 (-5.22, 5.28)  | 0.13 (-0.59, 0.78)  |
| Respiratory          | 1.35 (-0.15, 2.72)       | 2.28 (-5.64, 9.11)       | 1.70 (-4.01, 6.68)  | 0.26 (-0.48, 0.91)  |
| Age, years           |                          |                          |                     |                     |
| ≤64                  | 0.44 (-0.63, 1.43)       | 1.34 (-4.52, 6.30)       | 0.06 (-5.58, 5.56)  | 0.02 (-0.70, 0.72)  |
| 65–74                | 0.68 (-0.37, 1.72)       | 2.91 (-3.72, 8.51)       | -1.14 (-7.03, 4.22) | -0.12 (-0.83, 0.61) |
| ≥75                  | <b>1.71 (0.91, 2.48)</b> | 3.89 (-0.36, 7.66)       | 1.32 (-2.38, 4.64)  | 0.24 (-0.22, 0.68)  |
| Gender               |                          |                          |                     |                     |
| Male                 | <b>1.02 (0.28, 1.74)</b> | 2.76 (-1.08, 6.27)       | 0.41 (-3.25, 3.87)  | 0.09 (-0.40, 0.53)  |
| Female               | <b>1.36 (0.55, 2.15)</b> | 3.48 (-0.77, 7.36)       | 0.76 (-3.26, 4.20)  | 0.15 (-0.37, 0.62)  |
| Occupation           |                          |                          |                     |                     |
| Farmer               | <b>1.42 (0.82, 2.04)</b> | <b>3.71 (0.38, 6.70)</b> | 0.61 (-2.47, 3.39)  | 0.13 (-0.27, 0.52)  |
| Non-farmer           | 0.39 (-0.73, 1.41)       | 0.84 (-5.98, 6.43)       | 0.45 (-6.15, 5.95)  | 0.07 (-0.65, 0.74)  |
| Ethnic               |                          |                          |                     |                     |
| Han nationality      | <b>1.22 (0.54, 1.91)</b> | 1.69 (-2.20, 5.31)       | 2.30 (-0.73, 5.42)  | 0.34 (-0.06, 0.76)  |
| Ethnic minorities    | <b>1.03 (0.07, 1.93)</b> | <b>5.71 (0.91, 9.74)</b> | -3.84 (-9.8, 1.12)  | -0.43 (-1.12, 0.25) |
| Marital status       |                          |                          |                     |                     |
| Married              | <b>0.98 (0.26, 1.66)</b> | 1.86 (-2.06, 5.17)       | 1.32 (-2.17, 4.62)  | 0.21 (-0.24, 0.61)  |
| Non-married          | <b>1.47 (0.59, 2.25)</b> | <b>4.88 (0.19, 9.18)</b> | -0.60 (-5.16, 3.37) | -0.02 (-0.58, 0.50) |

Results are expressed as attributable fractions (95% empirical confidence intervals), and the bold indicates a statistically significant.

## Figure Legends

**Figure 1.** Time series of daily number of non-accidental deaths of Yuxi and mean temperature, 2009–2016.

**Figure 2.** Overall cumulative relative risk (with 95% empirical confidence intervals, shaded grey) at a lag of 0–28 days in Yuxi, China, with histogram of daily temperature distribution. The dotted lines are the median of the mean temperature, and the dashed lines are the 2.5th and 97.5th percentiles of the distribution of mean temperature. The lines before and after the dotted lines represent the exposure response below (blue lines) and above (red lines) the median of mean temperature.

**Figure 3.** Daily number of total non-accidental deaths attributable to cold (blue points) and heat (red points).

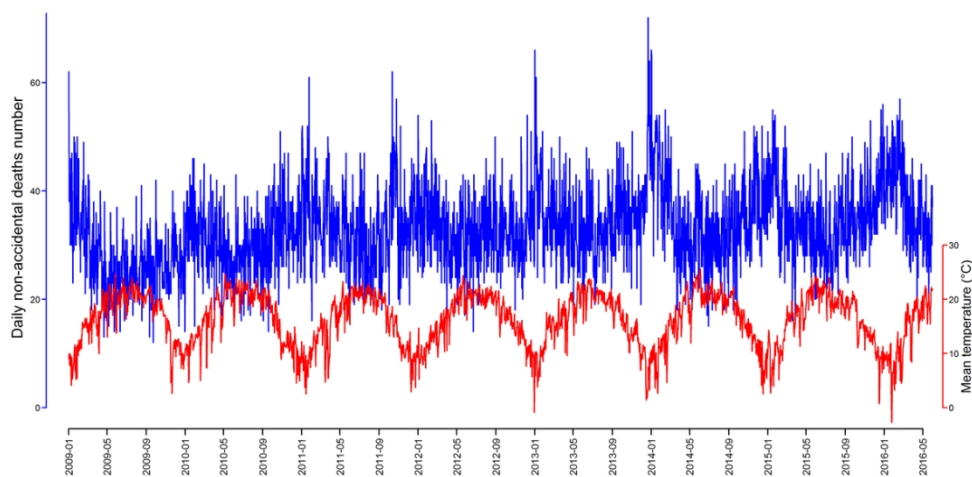

Time series of daily number of non-accidental deaths of Yuxi and mean temperature, 2009–2016

105x52mm (300 x 300 DPI)

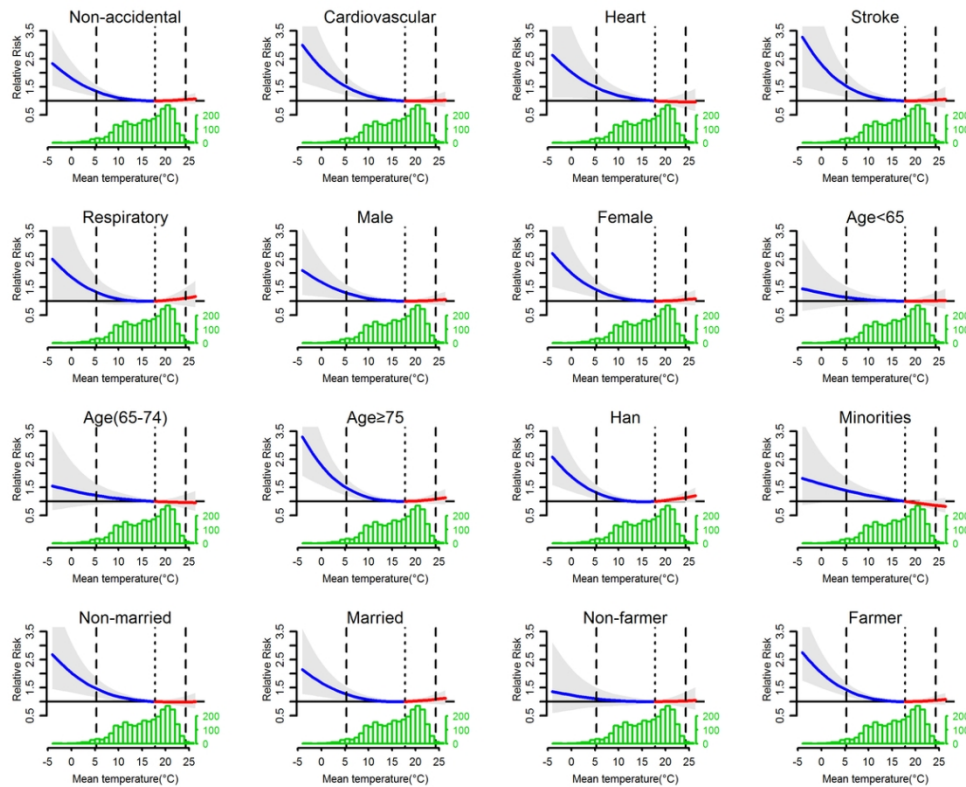

Overall cumulative relative risk (with 95% empirical confidence intervals, shaded grey) at a lag of 0–28 days in Yuxi, China, with histogram of daily temperature distribution. The dotted lines are the median of the mean temperature, and the dashed lines are the 2.5th and 97.5th percentiles of the distribution of mean temperature. The lines before and after the dotted lines represent the exposure response below (blue lines) and above (red lines) the median of mean temperature

101x81mm (300 x 300 DPI)

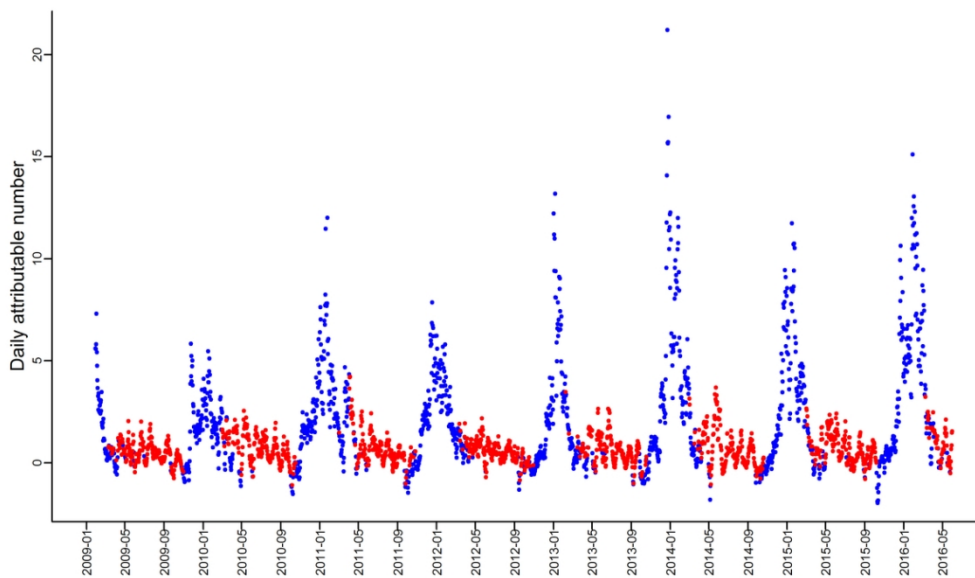

Daily number of total non-accidental deaths attributable to cold (blue points) and heat (red points)

101x60mm (300 x 300 DPI)



## Supplemental materials

**Table S1.** Descriptive statistics for weather conditions, 2009–2016.

|                            | Min   | 25 <sup>th</sup> | Median | 75 <sup>th</sup> | Max   | Mean (SD) |
|----------------------------|-------|------------------|--------|------------------|-------|-----------|
| Mean temperature (°C)      | -3.3  | 12.3             | 17.0   | 20.2             | 25.6  | 16.1±4.9  |
| Relative humidity (%)      | 25.0  | 58.0             | 71.0   | 78.0             | 95.0  | 67.3±14.7 |
| Atmospheric pressure (hPa) | 802.7 | 807.9            | 810.1  | 812.5            | 822.2 | 810.3±3.2 |
| Wind speed (m/s)           | 0.5   | 1.9              | 2.5    | 3.2              | 8.6   | 2.7±1.1   |
| Sunshine duration (h)      | 0     | 3.1              | 7.6    | 9.9              | 12.9  | 6.5±3.9   |

**Table S2.** Attributable number of non-accidental deaths and specific categories due to daily mean temperature, computed as total and as separated components for cold and heat temperatures over lag 0–28 days in Yuxi, China.

|                      | Total                    | Cold                    | Heat               |
|----------------------|--------------------------|-------------------------|--------------------|
| Total non-accidental | <b>4131 (2306, 5937)</b> | <b>3482 (552, 5980)</b> | 652 (-2049, 3185)  |
| Cause-specific       |                          |                         |                    |
| Cardiovascular       | <b>2419 (2622, 7476)</b> | <b>2489 (629, 4141)</b> | -68 (-2019, 1701)  |
| Heart                | <b>912 (446, 8413)</b>   | 1112 (-98, 2200)        | -199 (-1456, 918)  |
| Stroke               | <b>1417 (2055, 8814)</b> | <b>1306 (104, 2634)</b> | 113 (-1178, 1283)  |
| Respiratory          | 854 (-428, 8228)         | 540 (-846, 1689)        | 314 (-822, 1190)   |
| Age, years           |                          |                         |                    |
| ≤64                  | 414 (-2421, 5413)        | 359 (-976, 1580)        | 55 (-1384, 1237)   |
| 65-74                | 470 (-2366, 5715)        | 679 (-764, 1853)        | -209 (-1543, 953)  |
| ≥75                  | <b>3137 (3094, 7816)</b> | <b>2431 (102, 4392)</b> | 710 (-1135, 2532)  |
| Gender               |                          |                         |                    |
| Male                 | <b>1977 (818, 5961)</b>  | 1706 (-395, 3697)       | 273 (-1668, 2048)  |
| Female               | <b>2181 (1691, 7074)</b> | 1802 (-59, 3390)        | 380 (-1355, 1919)  |
| Occupation           |                          |                         |                    |
| Farmer               | <b>3752 (2730, 6784)</b> | <b>3225 (801, 5403)</b> | 530 (-1799, 2580)  |
| Non-farmer           | 364 (-2842, 5120)        | 242 (-1320, 1486)       | 124 (-1293, 1350)  |
| Ethnic               |                          |                         |                    |
| Han nationality      | <b>3243 (2237, 6688)</b> | 1624 (-972, 4023)       | 1618 (-622, 3621)  |
| Ethnic minorities    | 649 (-1165, 5773)        | <b>1685 (332, 2934)</b> | -1037 (-2677, 488) |
| Marital status       |                          |                         |                    |
| Married              | <b>2262 (1118, 5804)</b> | 1402 (-833, 3564)       | 860 (-1201, 2875)  |
| Non-married          | <b>1843 (1892, 7386)</b> | <b>2042 (334, 3527)</b> | -197 (-1963, 1218) |

Results are expressed as attributable number (95% empirical confidence interval), and the bold indicates a statistically significant.

**Table S3.** Mortality number attributable to extreme and mild cold and mild and extreme heat by specific causes and individual characteristics

|                      | Extreme cold            | Mild cold               | Mild heat          | Extreme heat    |
|----------------------|-------------------------|-------------------------|--------------------|-----------------|
| Total non-accidental | <b>1054 (604, 1530)</b> | 2556 (-117, 5016)       | 554 (-1930, 2984)  | 108 (-199, 395) |
| Cause-specific       |                         |                         |                    |                 |
| Cardiovascular       | <b>657 (331, 946)</b>   | <b>1942 (183, 3532)</b> | -84 (-1803, 1505)  | 15 (-191, 217)  |
| Heart                | <b>264 (72, 445)</b>    | 892 (-146, 1896)        | -190 (-1385, 830)  | -13 (-154, 109) |
| Stroke               | <b>368 (136, 600)</b>   | 997 (-345, 2170)        | 87 (-1095, 1183)   | 28 (-129, 169)  |
| Respiratory          | 223 (-30, 434)          | 337 (-1005, 1413)       | 277 (-643, 1006)   | 42 (-89, 161)   |
| Age, years           |                         |                         |                    |                 |
| ≤64                  | 101 (-135, 308)         | 265 (-1039, 1292)       | 46 (-1121, 1094)   | 10 (-135, 149)  |
| 65-74                | 140 (-75, 331)          | 554 (-685, 1578)        | -192 (-1434, 971)  | -20 (-181, 116) |
| ≥75                  | <b>814 (431, 1152)</b>  | 1732 (-123, 3465)       | 612 (-1103, 2097)  | 110 (-99, 313)  |
| Gender               |                         |                         |                    |                 |
| Male                 | <b>503 (118, 851)</b>   | 1257 (-681, 3097)       | 229 (-1651, 1917)  | 47 (-153, 264)  |
| Female               | <b>556 (238, 882)</b>   | 1321 (-483, 2860)       | 325 (-1203, 1755)  | 61 (-134, 248)  |
| Occupation           |                         |                         |                    |                 |
| Farmer               | <b>977 (564, 1376)</b>  | <b>2382 (27, 4440)</b>  | 446 (-1638, 2333)  | 92 (-173, 349)  |
| Non-farmer           | 83 (-125, 295)          | 158 (-1263, 1389)       | 109 (-1137, 1255)  | 16 (-128, 158)  |
| Ethnic               |                         |                         |                    |                 |
| Han nationality      | <b>772 (364, 1191)</b>  | 918 (-1565, 3045)       | 1440 (-488, 3387)  | 209 (-57, 433)  |
| Ethnic minorities    | 274 (-1, 500)           | <b>1462 (162, 2576)</b> | -941 (-2416, 330)  | -104 (-277, 62) |
| Marital status       |                         |                         |                    |                 |
| Married              | <b>544 (165, 908)</b>   | 908 (-1292, 2815)       | 759 (-995, 2607)   | 117 (-125, 344) |
| Non-married          | <b>509 (219, 781)</b>   | <b>1615 (4, 3017)</b>   | -192 (-1730, 1143) | -7 (-198, 158)  |

Results are expressed as attributable number (95% empirical confidence interval), and the bold indicates a statistically significant.

**Table S4** Sensitivity analyses to calculate the fraction (%) with 95% empirical confidence interval attributable to temperature by changing maximum lag for mean temperature and degrees of freedom (*df*) for covariates

| Model choices               | Total             | Cold               | Heat                |
|-----------------------------|-------------------|--------------------|---------------------|
| Lag period, days            |                   |                    |                     |
| 7                           | 2.85 (1.62, 3.99) | 0.97 (-1.16, 2.98) | 1.88 (0.32, 3.31)   |
| 14                          | 4.15 (2.78, 5.52) | 2.90 (0.59, 5.15)  | 1.25 (-0.48, 2.93)  |
| 21                          | 3.57 (1.51, 5.31) | 3.10 (0.25, 5.76)  | 0.47 (-1.99, 2.89)  |
| Df for time per year        |                   |                    |                     |
| 5                           | 4.69 (3.10, 6.15) | 4.19 (1.18, 6.73)  | 0.51 (-1.66, 2.81)  |
| 6                           | 5.94 (4.07, 7.53) | 4.96 (2.18, 7.72)  | 0.98 (-1.68, 3.49)  |
| 8                           | 3.82 (0.92, 6.42) | 4.72 (1.23, 8.07)  | -0.90 (-4.31, 2.26) |
| 9                           | 5.07 (2.15, 7.75) | 4.59 (0.57, 8.16)  | 0.48 (-2.98, 3.75)  |
| Df for relative humidity    |                   |                    |                     |
| 2                           | 4.64 (2.21, 6.83) | 4.07 (0.84, 7.28)  | 0.57 (-2.70, 3.56)  |
| 4                           | 4.74 (2.31, 6.88) | 4.05 (0.56, 7.26)  | 0.69 (-2.15, 3.83)  |
| 5                           | 4.79 (2.55, 6.92) | 4.20 (1.06, 7.20)  | 0.60 (-2.76, 3.36)  |
| Df for sunshine duration    |                   |                    |                     |
| 2                           | 4.71 (2.27, 6.84) | 4.18 (0.88, 7.35)  | 0.54 (-2.89, 3.51)  |
| 4                           | 4.75 (2.39, 6.95) | 4.08 (0.92, 7.03)  | 0.67 (-2.51, 3.65)  |
| 5                           | 4.78 (2.44, 6.90) | 4.13 (0.69, 7.45)  | 0.65 (-2.40, 3.63)  |
| Df for atmospheric pressure |                   |                    |                     |
| 2                           | 4.76 (2.24, 6.87) | 4.15 (0.76, 7.00)  | 0.62 (-2.69, 3.49)  |
| 4                           | 4.75 (2.21, 6.97) | 4.09 (0.39, 6.95)  | 0.67 (-2.49, 3.76)  |
| 5                           | 4.79 (2.38, 6.95) | 4.02 (1.01, 7.08)  | 0.77 (-2.30, 3.98)  |
| Df for wind speed           |                   |                    |                     |
| 2                           | 4.79 (2.26, 6.90) | 4.02 (0.47, 6.88)  | 0.78 (-2.34, 3.52)  |
| 4                           | 4.68 (2.34, 6.78) | 4.02 (0.60, 7.07)  | 0.67 (-2.48, 3.68)  |
| 5                           | 4.66 (2.31, 6.85) | 4.04 (0.90, 6.94)  | 0.62 (-2.56, 3.75)  |

Results are expressed as attributable fractions (95% empirical confidence intervals), and the bold indicates a statistically significant.

Table S5. Attributable fraction (%) of total non-accidental mortality and by specific causes and individual characteristics due to daily mean temperature and cold and heat over lag 0-28 days with minimum mortality temperature (MMT) as the referent temperature.

|                    | Total death | MMT  | Total(%)             | Cold(%)             | Heat(%)             |
|--------------------|-------------|------|----------------------|---------------------|---------------------|
| Total non-accident | 89,467      | 16.7 | 4.66 (2.26, 6.85)    | 3.93 (0.60, 7.01)   | 0.73 (-2.69, 3.88)  |
| Cause-specific     |             |      |                      |                     |                     |
| Cardiovascular     | 41,794      | 19.7 | 6.57 (-1.01, 12.97)  | 6.42 (1.82, 9.37)   | 0.15 (-1.40, 1.62)  |
| Heart              | 17,793      | 24.7 | 8.76 (-33.20, 36.26) | 8.76 (0.35, 9.26)   | 0 (0, 0)            |
| Stroke             | 22,589      | 17.7 | 6.48 (1.76, 10.02)   | 5.92 (-0.45, 11.17) | 0.57 (-4.22, 4.94)  |
| Respiratory        | 16,565      | 14.7 | 5.89 (-3.58, 13.34)  | 3.67 (-4.89, 10.02) | 2.23 (-8.88, 11.19) |
| Age, years         |             |      |                      |                     |                     |
| ≤64                | 21,678      | 17.7 | 1.94 (-2.77, 5.73)   | 1.68 (-4.87, 7.06)  | 0.26 (-4.83, 4.96)  |
| 65-74              | 20,072      | 24.7 | 6.84 (-30.05, 32.26) | 6.84 (-2.53, 6.33)  | 0 (0, 0)            |
| ≥75                | 47,717      | 16.7 | 6.72 (3.60, 9.47)    | 5.19 (0.65, 9.20)   | 1.54 (-2.87, 5.51)  |
| Gender             |             |      |                      |                     |                     |
| Male               | 48,939      | 17.7 | 4.08 (0.77, 6.75)    | 3.52 (-0.97, 7.46)  | 0.56 (-2.85, 3.73)  |
| Female             | 40,528      | 16.7 | 5.44 (2.04, 8.43)    | 4.5 (-0.18, 8.73)   | 0.95 (-3.72, 5.23)  |
| Occupation         |             |      |                      |                     |                     |
| Farmer             | 68,278      | 16.7 | 5.52 (2.95, 7.90)    | 4.75 (1.10, 8.10)   | 0.77 (-2.93, 4.18)  |
| Nonfarmer          | 21,189      | 15.7 | 1.87 (-5.49, 7.85)   | 1.22 (-5.80, 7.16)  | 0.66 (-8.75, 8.56)  |
| Ethnic             |             |      |                      |                     |                     |
| Han nationality    | 63,275      | 14.7 | 6.49 (1.48, 10.89)   | 3.24 (-1.29, 6.30)  | 3.25 (-2.54, 8.50)  |
| Ethnic minorities  | 26,192      | 24.7 | 19.55 (-7.14, 38.61) | 19.55 (-1.87, 6.2)  | 0 (0, 0)            |
| Married status     |             |      |                      |                     |                     |
| Married            | 54,971      | 15.7 | 4.60 (0.53, 8.18)    | 2.80 (-1.59, 6.48)  | 1.80 (-3.55, 6.54)  |
| Unmarried          | 34,496      | 20.7 | 6.89 (-4.51, 16.26)  | 6.86 (1.89, 8.74)   | 0.03 (-0.77, 0.81)  |

Results are expressed as attributable fractions (95% empirical confidence intervals), and the bold indicates a statistically significant.

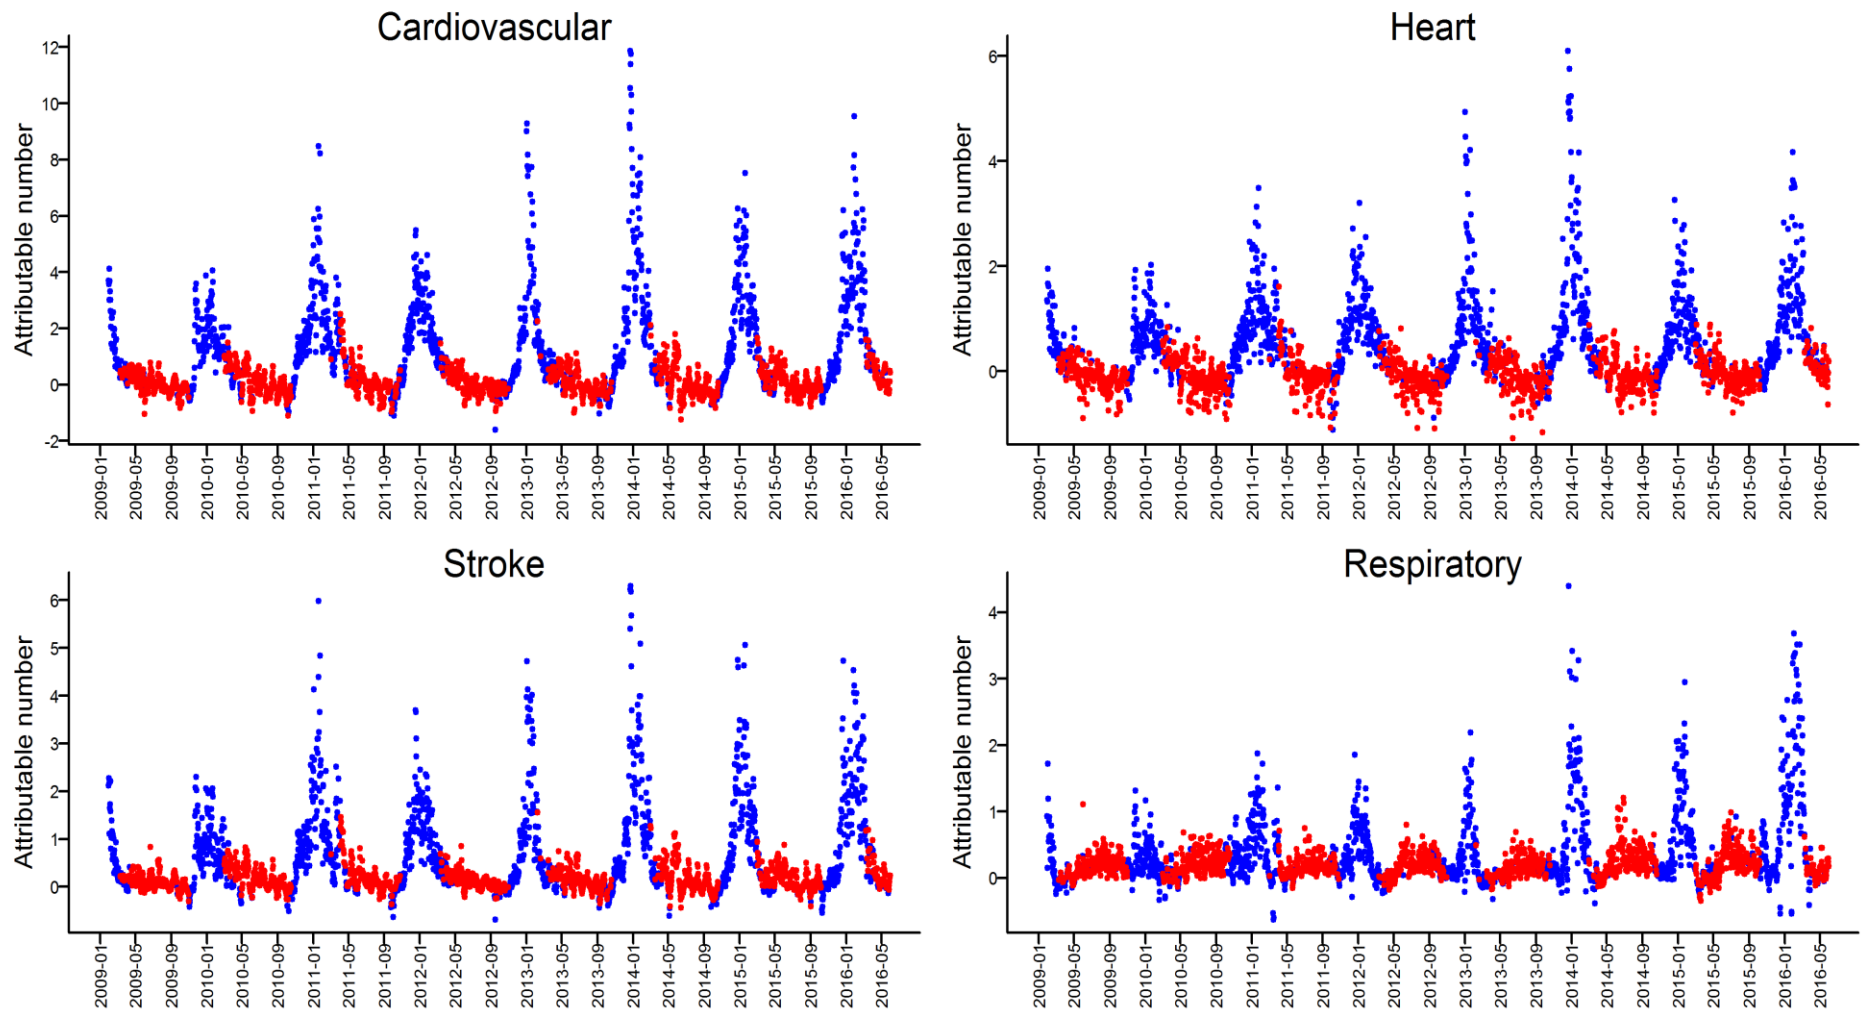

**Figure S1.** Daily number of cardiovascular, heart, stroke and respiratory deaths attributable to cold (blue points) and heat (red points) temperatures.

**STROBE 2007 (v4) checklist of items to be included in reports of observational studies in epidemiology\***  
**Checklist for cohort, case-control, and cross-sectional studies (combined)**

| Section/Topic             | Item # | Recommendation                                                                                                                                                                                                                                                                                                                                                                                                                                                         | Reported on page # |
|---------------------------|--------|------------------------------------------------------------------------------------------------------------------------------------------------------------------------------------------------------------------------------------------------------------------------------------------------------------------------------------------------------------------------------------------------------------------------------------------------------------------------|--------------------|
| Title and abstract        | 1      | (a) Indicate the study's design with a commonly used term in the title or the abstract                                                                                                                                                                                                                                                                                                                                                                                 | 1                  |
|                           |        | (b) Provide in the abstract an informative and balanced summary of what was done and what was found                                                                                                                                                                                                                                                                                                                                                                    | 2                  |
| <b>Introduction</b>       |        |                                                                                                                                                                                                                                                                                                                                                                                                                                                                        | <b>3-4</b>         |
| Background/rationale      | 2      | Explain the scientific background and rationale for the investigation being reported                                                                                                                                                                                                                                                                                                                                                                                   | 3-4                |
| Objectives                | 3      | State specific objectives, including any pre-specified hypotheses                                                                                                                                                                                                                                                                                                                                                                                                      | 4                  |
| <b>Methods</b>            |        |                                                                                                                                                                                                                                                                                                                                                                                                                                                                        | <b>4-6</b>         |
| Study design              | 4      | Present key elements of study design early in the paper                                                                                                                                                                                                                                                                                                                                                                                                                | 4                  |
| Setting                   | 5      | Describe the setting, locations, and relevant dates, including periods of recruitment, exposure, follow-up, and data collection                                                                                                                                                                                                                                                                                                                                        | 4-5                |
| Participants              | 6      | (a) <i>Cohort study</i> —Give the eligibility criteria, and the sources and methods of selection of participants. Describe methods of follow-up<br><i>Case-control study</i> —Give the eligibility criteria, and the sources and methods of case ascertainment and control selection. Give the rationale for the choice of cases and controls<br><i>Cross-sectional study</i> —Give the eligibility criteria, and the sources and methods of selection of participants | not applicable     |
|                           |        | (b) <i>Cohort study</i> —For matched studies, give matching criteria and number of exposed and unexposed<br><i>Case-control study</i> —For matched studies, give matching criteria and the number of controls per case                                                                                                                                                                                                                                                 | not applicable     |
| Variables                 | 7      | Clearly define all outcomes, exposures, predictors, potential confounders, and effect modifiers. Give diagnostic criteria, if applicable                                                                                                                                                                                                                                                                                                                               | 5-6                |
| Data sources/ measurement | 8*     | For each variable of interest, give sources of data and details of methods of assessment (measurement). Describe comparability of assessment methods if there is more than one group                                                                                                                                                                                                                                                                                   | 5-6                |
| Bias                      | 9      | Describe any efforts to address potential sources of bias                                                                                                                                                                                                                                                                                                                                                                                                              | 5                  |
| Study size                | 10     | Explain how the study size was arrived at                                                                                                                                                                                                                                                                                                                                                                                                                              | 5                  |
| Quantitative variables    | 11     | Explain how quantitative variables were handled in the analyses. If applicable, describe which groupings were chosen and why                                                                                                                                                                                                                                                                                                                                           | 5-6                |
| Statistical methods       | 12     | (a) Describe all statistical methods, including those used to control for confounding                                                                                                                                                                                                                                                                                                                                                                                  | 5-6                |
|                           |        | (b) Describe any methods used to examine subgroups and interactions                                                                                                                                                                                                                                                                                                                                                                                                    | 5-6                |
|                           |        | (c) Explain how missing data were addressed                                                                                                                                                                                                                                                                                                                                                                                                                            | not applicable     |
|                           |        | (d) <i>Cohort study</i> —If applicable, explain how loss to follow-up was addressed<br><i>Case-control study</i> —If applicable, explain how matching of cases and controls was addressed                                                                                                                                                                                                                                                                              | not applicable     |

|                          |     |                                                                                                                                                                                                              |                |
|--------------------------|-----|--------------------------------------------------------------------------------------------------------------------------------------------------------------------------------------------------------------|----------------|
|                          |     | <i>Cross-sectional study</i> —If applicable, describe analytical methods taking account of sampling strategy                                                                                                 |                |
|                          |     | (e) Describe any sensitivity analyses                                                                                                                                                                        | 6              |
| <b>Results</b>           |     |                                                                                                                                                                                                              | 6-8            |
| Participants             | 13* | (a) Report numbers of individuals at each stage of study—eg numbers potentially eligible, examined for eligibility, confirmed eligible, included in the study, completing follow-up, and analysed            | 6-7            |
|                          |     | (b) Give reasons for non-participation at each stage                                                                                                                                                         | not applicable |
|                          |     | (c) Consider use of a flow diagram                                                                                                                                                                           | not applicable |
| Descriptive data         | 14* | (a) Give characteristics of study participants (eg demographic, clinical, social) and information on exposures and potential confounders                                                                     | 6-7            |
|                          |     | (b) Indicate number of participants with missing data for each variable of interest                                                                                                                          | not applicable |
|                          |     | (c) <i>Cohort study</i> —Summarise follow-up time (eg, average and total amount)                                                                                                                             | not applicable |
| Outcome data             | 15* | <i>Cohort study</i> —Report numbers of outcome events or summary measures over time                                                                                                                          | not applicable |
|                          |     | <i>Case-control study</i> —Report numbers in each exposure category, or summary measures of exposure                                                                                                         | not applicable |
|                          |     | <i>Cross-sectional study</i> —Report numbers of outcome events or summary measures                                                                                                                           | 6-7            |
| Main results             | 16  | (a) Give unadjusted estimates and, if applicable, confounder-adjusted estimates and their precision (eg, 95% confidence interval). Make clear which confounders were adjusted for and why they were included | 6-8            |
|                          |     | (b) Report category boundaries when continuous variables were categorized                                                                                                                                    | not applicable |
|                          |     | (c) If relevant, consider translating estimates of relative risk into absolute risk for a meaningful time period                                                                                             | not applicable |
| Other analyses           | 17  | Report other analyses done—eg analyses of subgroups and interactions, and sensitivity analyses                                                                                                               | 8              |
| <b>Discussion</b>        |     |                                                                                                                                                                                                              | 8-12           |
| Key results              | 18  | Summarise key results with reference to study objectives                                                                                                                                                     | 8-9            |
| Limitations              | 19  | Discuss limitations of the study, taking into account sources of potential bias or imprecision. Discuss both direction and magnitude of any potential bias                                                   | 12             |
| Interpretation           | 20  | Give a cautious overall interpretation of results considering objectives, limitations, multiplicity of analyses, results from similar studies, and other relevant evidence                                   | 8-12           |
| Generalisability         | 21  | Discuss the generalisability (external validity) of the study results                                                                                                                                        | 12             |
| <b>Other information</b> |     |                                                                                                                                                                                                              | 12-13          |
| Funding                  | 22  | Give the source of funding and the role of the funders for the present study and, if applicable, for the original study on which the present article is based                                                | 13             |

\*Give information separately for cases and controls in case-control studies and, if applicable, for exposed and unexposed groups in cohort and cross-sectional studies.

**Note:** An Explanation and Elaboration article discusses each checklist item and gives methodological background and published examples of transparent reporting. The STROBE checklist is best used in conjunction with this article (freely available on the Web sites of PLoS Medicine at <http://www.plosmedicine.org/>, Annals of Internal Medicine at <http://www.annals.org/>, and Epidemiology at <http://www.epidem.com/>). Information on the STROBE Initiative is available at [www.strobe-statement.org](http://www.strobe-statement.org).
