# Supplementary material for: Burden of non-accidental mortality attributable to ambient temperatures: a time series study in a high plateau area of southwest China
Source: PubMed Central journal article supplement — BMJ Open. 2019 Feb 15;9(2):e024708. doi: 10.1136/bmjopen-2018-024708 (PMC6398624; doi:10.1136/bmjopen-2018-024708), 2019-02-15
Supplement: bmjopen-2018-024708supp001.pdf [file bmjopen-2018-024708supp001.pdf]

## Supplemental materials

**Table S1.** Descriptive statistics for weather conditions, 2009–2016.

|                            | Min   | 25 <sup>th</sup> | Median | 75 <sup>th</sup> | Max   | Mean (SD) |
|----------------------------|-------|------------------|--------|------------------|-------|-----------|
| Mean temperature (°C)      | -3.3  | 12.3             | 17.0   | 20.2             | 25.6  | 16.1±4.9  |
| Relative humidity (%)      | 25.0  | 58.0             | 71.0   | 78.0             | 95.0  | 67.3±14.7 |
| Atmospheric pressure (hPa) | 802.7 | 807.9            | 810.1  | 812.5            | 822.2 | 810.3±3.2 |
| Wind speed (m/s)           | 0.5   | 1.9              | 2.5    | 3.2              | 8.6   | 2.7±1.1   |
| Sunshine duration (h)      | 0     | 3.1              | 7.6    | 9.9              | 12.9  | 6.5±3.9   |

**Table S2.** Attributable number of non-accidental deaths and specific categories due to daily mean temperature, computed as total and as separated components for cold and heat temperatures over lag 0–28 days in Yuxi, China.

|                      | Total                    | Cold                    | Heat               |
|----------------------|--------------------------|-------------------------|--------------------|
| Total non-accidental | <b>4131 (2306, 5937)</b> | <b>3482 (552, 5980)</b> | 652 (-2049, 3185)  |
| Cause-specific       |                          |                         |                    |
| Cardiovascular       | <b>2419 (2622, 7476)</b> | <b>2489 (629, 4141)</b> | -68 (-2019, 1701)  |
| Heart                | <b>912 (446, 8413)</b>   | 1112 (-98, 2200)        | -199 (-1456, 918)  |
| Stroke               | <b>1417 (2055, 8814)</b> | <b>1306 (104, 2634)</b> | 113 (-1178, 1283)  |
| Respiratory          | 854 (-428, 8228)         | 540 (-846, 1689)        | 314 (-822, 1190)   |
| Age, years           |                          |                         |                    |
| ≤64                  | 414 (-2421, 5413)        | 359 (-976, 1580)        | 55 (-1384, 1237)   |
| 65-74                | 470 (-2366, 5715)        | 679 (-764, 1853)        | -209 (-1543, 953)  |
| ≥75                  | <b>3137 (3094, 7816)</b> | <b>2431 (102, 4392)</b> | 710 (-1135, 2532)  |
| Gender               |                          |                         |                    |
| Male                 | <b>1977 (818, 5961)</b>  | 1706 (-395, 3697)       | 273 (-1668, 2048)  |
| Female               | <b>2181 (1691, 7074)</b> | 1802 (-59, 3390)        | 380 (-1355, 1919)  |
| Occupation           |                          |                         |                    |
| Farmer               | <b>3752 (2730, 6784)</b> | <b>3225 (801, 5403)</b> | 530 (-1799, 2580)  |
| Non-farmer           | 364 (-2842, 5120)        | 242 (-1320, 1486)       | 124 (-1293, 1350)  |
| Ethnic               |                          |                         |                    |
| Han nationality      | <b>3243 (2237, 6688)</b> | 1624 (-972, 4023)       | 1618 (-622, 3621)  |
| Ethnic minorities    | 649 (-1165, 5773)        | <b>1685 (332, 2934)</b> | -1037 (-2677, 488) |
| Marital status       |                          |                         |                    |
| Married              | <b>2262 (1118, 5804)</b> | 1402 (-833, 3564)       | 860 (-1201, 2875)  |
| Non-married          | <b>1843 (1892, 7386)</b> | <b>2042 (334, 3527)</b> | -197 (-1963, 1218) |

Results are expressed as attributable number (95% empirical confidence interval), and the bold indicates a statistically significant.

**Table S3.** Mortality number attributable to extreme and mild cold and mild and extreme heat by specific causes and individual characteristics

|                      | Extreme cold            | Mild cold               | Mild heat          | Extreme heat    |
|----------------------|-------------------------|-------------------------|--------------------|-----------------|
| Total non-accidental | <b>1054 (604, 1530)</b> | 2556 (-117, 5016)       | 554 (-1930, 2984)  | 108 (-199, 395) |
| Cause-specific       |                         |                         |                    |                 |
| Cardiovascular       | <b>657 (331, 946)</b>   | <b>1942 (183, 3532)</b> | -84 (-1803, 1505)  | 15 (-191, 217)  |
| Heart                | <b>264 (72, 445)</b>    | 892 (-146, 1896)        | -190 (-1385, 830)  | -13 (-154, 109) |
| Stroke               | <b>368 (136, 600)</b>   | 997 (-345, 2170)        | 87 (-1095, 1183)   | 28 (-129, 169)  |
| Respiratory          | 223 (-30, 434)          | 337 (-1005, 1413)       | 277 (-643, 1006)   | 42 (-89, 161)   |
| Age, years           |                         |                         |                    |                 |
| ≤64                  | 101 (-135, 308)         | 265 (-1039, 1292)       | 46 (-1121, 1094)   | 10 (-135, 149)  |
| 65-74                | 140 (-75, 331)          | 554 (-685, 1578)        | -192 (-1434, 971)  | -20 (-181, 116) |
| ≥75                  | <b>814 (431, 1152)</b>  | 1732 (-123, 3465)       | 612 (-1103, 2097)  | 110 (-99, 313)  |
| Gender               |                         |                         |                    |                 |
| Male                 | <b>503 (118, 851)</b>   | 1257 (-681, 3097)       | 229 (-1651, 1917)  | 47 (-153, 264)  |
| Female               | <b>556 (238, 882)</b>   | 1321 (-483, 2860)       | 325 (-1203, 1755)  | 61 (-134, 248)  |
| Occupation           |                         |                         |                    |                 |
| Farmer               | <b>977 (564, 1376)</b>  | <b>2382 (27, 4440)</b>  | 446 (-1638, 2333)  | 92 (-173, 349)  |
| Non-farmer           | 83 (-125, 295)          | 158 (-1263, 1389)       | 109 (-1137, 1255)  | 16 (-128, 158)  |
| Ethnic               |                         |                         |                    |                 |
| Han nationality      | <b>772 (364, 1191)</b>  | 918 (-1565, 3045)       | 1440 (-488, 3387)  | 209 (-57, 433)  |
| Ethnic minorities    | 274 (-1, 500)           | <b>1462 (162, 2576)</b> | -941 (-2416, 330)  | -104 (-277, 62) |
| Marital status       |                         |                         |                    |                 |
| Married              | <b>544 (165, 908)</b>   | 908 (-1292, 2815)       | 759 (-995, 2607)   | 117 (-125, 344) |
| Non-married          | <b>509 (219, 781)</b>   | <b>1615 (4, 3017)</b>   | -192 (-1730, 1143) | -7 (-198, 158)  |

Results are expressed as attributable number (95% empirical confidence interval), and the bold indicates a statistically significant.

**Table S4** Sensitivity analyses to calculate the fraction (%) with 95% empirical confidence interval attributable to temperature by changing maximum lag for mean temperature and degrees of freedom (*df*) for covariates

| Model choices               | Total             | Cold               | Heat                |
|-----------------------------|-------------------|--------------------|---------------------|
| Lag period, days            |                   |                    |                     |
| 7                           | 2.85 (1.62, 3.99) | 0.97 (-1.16, 2.98) | 1.88 (0.32, 3.31)   |
| 14                          | 4.15 (2.78, 5.52) | 2.90 (0.59, 5.15)  | 1.25 (-0.48, 2.93)  |
| 21                          | 3.57 (1.51, 5.31) | 3.10 (0.25, 5.76)  | 0.47 (-1.99, 2.89)  |
| Df for time per year        |                   |                    |                     |
| 5                           | 4.69 (3.10, 6.15) | 4.19 (1.18, 6.73)  | 0.51 (-1.66, 2.81)  |
| 6                           | 5.94 (4.07, 7.53) | 4.96 (2.18, 7.72)  | 0.98 (-1.68, 3.49)  |
| 8                           | 3.82 (0.92, 6.42) | 4.72 (1.23, 8.07)  | -0.90 (-4.31, 2.26) |
| 9                           | 5.07 (2.15, 7.75) | 4.59 (0.57, 8.16)  | 0.48 (-2.98, 3.75)  |
| Df for relative humidity    |                   |                    |                     |
| 2                           | 4.64 (2.21, 6.83) | 4.07 (0.84, 7.28)  | 0.57 (-2.70, 3.56)  |
| 4                           | 4.74 (2.31, 6.88) | 4.05 (0.56, 7.26)  | 0.69 (-2.15, 3.83)  |
| 5                           | 4.79 (2.55, 6.92) | 4.20 (1.06, 7.20)  | 0.60 (-2.76, 3.36)  |
| Df for sunshine duration    |                   |                    |                     |
| 2                           | 4.71 (2.27, 6.84) | 4.18 (0.88, 7.35)  | 0.54 (-2.89, 3.51)  |
| 4                           | 4.75 (2.39, 6.95) | 4.08 (0.92, 7.03)  | 0.67 (-2.51, 3.65)  |
| 5                           | 4.78 (2.44, 6.90) | 4.13 (0.69, 7.45)  | 0.65 (-2.40, 3.63)  |
| Df for atmospheric pressure |                   |                    |                     |
| 2                           | 4.76 (2.24, 6.87) | 4.15 (0.76, 7.00)  | 0.62 (-2.69, 3.49)  |
| 4                           | 4.75 (2.21, 6.97) | 4.09 (0.39, 6.95)  | 0.67 (-2.49, 3.76)  |
| 5                           | 4.79 (2.38, 6.95) | 4.02 (1.01, 7.08)  | 0.77 (-2.30, 3.98)  |
| Df for wind speed           |                   |                    |                     |
| 2                           | 4.79 (2.26, 6.90) | 4.02 (0.47, 6.88)  | 0.78 (-2.34, 3.52)  |
| 4                           | 4.68 (2.34, 6.78) | 4.02 (0.60, 7.07)  | 0.67 (-2.48, 3.68)  |
| 5                           | 4.66 (2.31, 6.85) | 4.04 (0.90, 6.94)  | 0.62 (-2.56, 3.75)  |

Results are expressed as attributable fractions (95% empirical confidence intervals), and the bold indicates a statistically significant.

Table S5. Attributable fraction (%) of total non-accidental mortality and by specific causes and individual characteristics due to daily mean temperature and cold and heat over lag 0-28 days with minimum mortality temperature (MMT) as the referent temperature.

|                    | Total death | MMT  | Total(%)             | Cold(%)             | Heat(%)             |
|--------------------|-------------|------|----------------------|---------------------|---------------------|
| Total non-accident | 89,467      | 16.7 | 4.66 (2.26, 6.85)    | 3.93 (0.60, 7.01)   | 0.73 (-2.69, 3.88)  |
| Cause-specific     |             |      |                      |                     |                     |
| Cardiovascular     | 41,794      | 19.7 | 6.57 (-1.01, 12.97)  | 6.42 (1.82, 9.37)   | 0.15 (-1.40, 1.62)  |
| Heart              | 17,793      | 24.7 | 8.76 (-33.20, 36.26) | 8.76 (0.35, 9.26)   | 0 (0, 0)            |
| Stroke             | 22,589      | 17.7 | 6.48 (1.76, 10.02)   | 5.92 (-0.45, 11.17) | 0.57 (-4.22, 4.94)  |
| Respiratory        | 16,565      | 14.7 | 5.89 (-3.58, 13.34)  | 3.67 (-4.89, 10.02) | 2.23 (-8.88, 11.19) |
| Age, years         |             |      |                      |                     |                     |
| ≤64                | 21,678      | 17.7 | 1.94 (-2.77, 5.73)   | 1.68 (-4.87, 7.06)  | 0.26 (-4.83, 4.96)  |
| 65-74              | 20,072      | 24.7 | 6.84 (-30.05, 32.26) | 6.84 (-2.53, 6.33)  | 0 (0, 0)            |
| ≥75                | 47,717      | 16.7 | 6.72 (3.60, 9.47)    | 5.19 (0.65, 9.20)   | 1.54 (-2.87, 5.51)  |
| Gender             |             |      |                      |                     |                     |
| Male               | 48,939      | 17.7 | 4.08 (0.77, 6.75)    | 3.52 (-0.97, 7.46)  | 0.56 (-2.85, 3.73)  |
| Female             | 40,528      | 16.7 | 5.44 (2.04, 8.43)    | 4.5 (-0.18, 8.73)   | 0.95 (-3.72, 5.23)  |
| Occupation         |             |      |                      |                     |                     |
| Farmer             | 68,278      | 16.7 | 5.52 (2.95, 7.90)    | 4.75 (1.10, 8.10)   | 0.77 (-2.93, 4.18)  |
| Nonfarmer          | 21,189      | 15.7 | 1.87 (-5.49, 7.85)   | 1.22 (-5.80, 7.16)  | 0.66 (-8.75, 8.56)  |
| Ethnic             |             |      |                      |                     |                     |
| Han nationality    | 63,275      | 14.7 | 6.49 (1.48, 10.89)   | 3.24 (-1.29, 6.30)  | 3.25 (-2.54, 8.50)  |
| Ethnic minorities  | 26,192      | 24.7 | 19.55 (-7.14, 38.61) | 19.55 (-1.87, 6.2)  | 0 (0, 0)            |
| Married status     |             |      |                      |                     |                     |
| Married            | 54,971      | 15.7 | 4.60 (0.53, 8.18)    | 2.80 (-1.59, 6.48)  | 1.80 (-3.55, 6.54)  |
| Unmarried          | 34,496      | 20.7 | 6.89 (-4.51, 16.26)  | 6.86 (1.89, 8.74)   | 0.03 (-0.77, 0.81)  |

Results are expressed as attributable fractions (95% empirical confidence intervals), and the bold indicates a statistically significant.

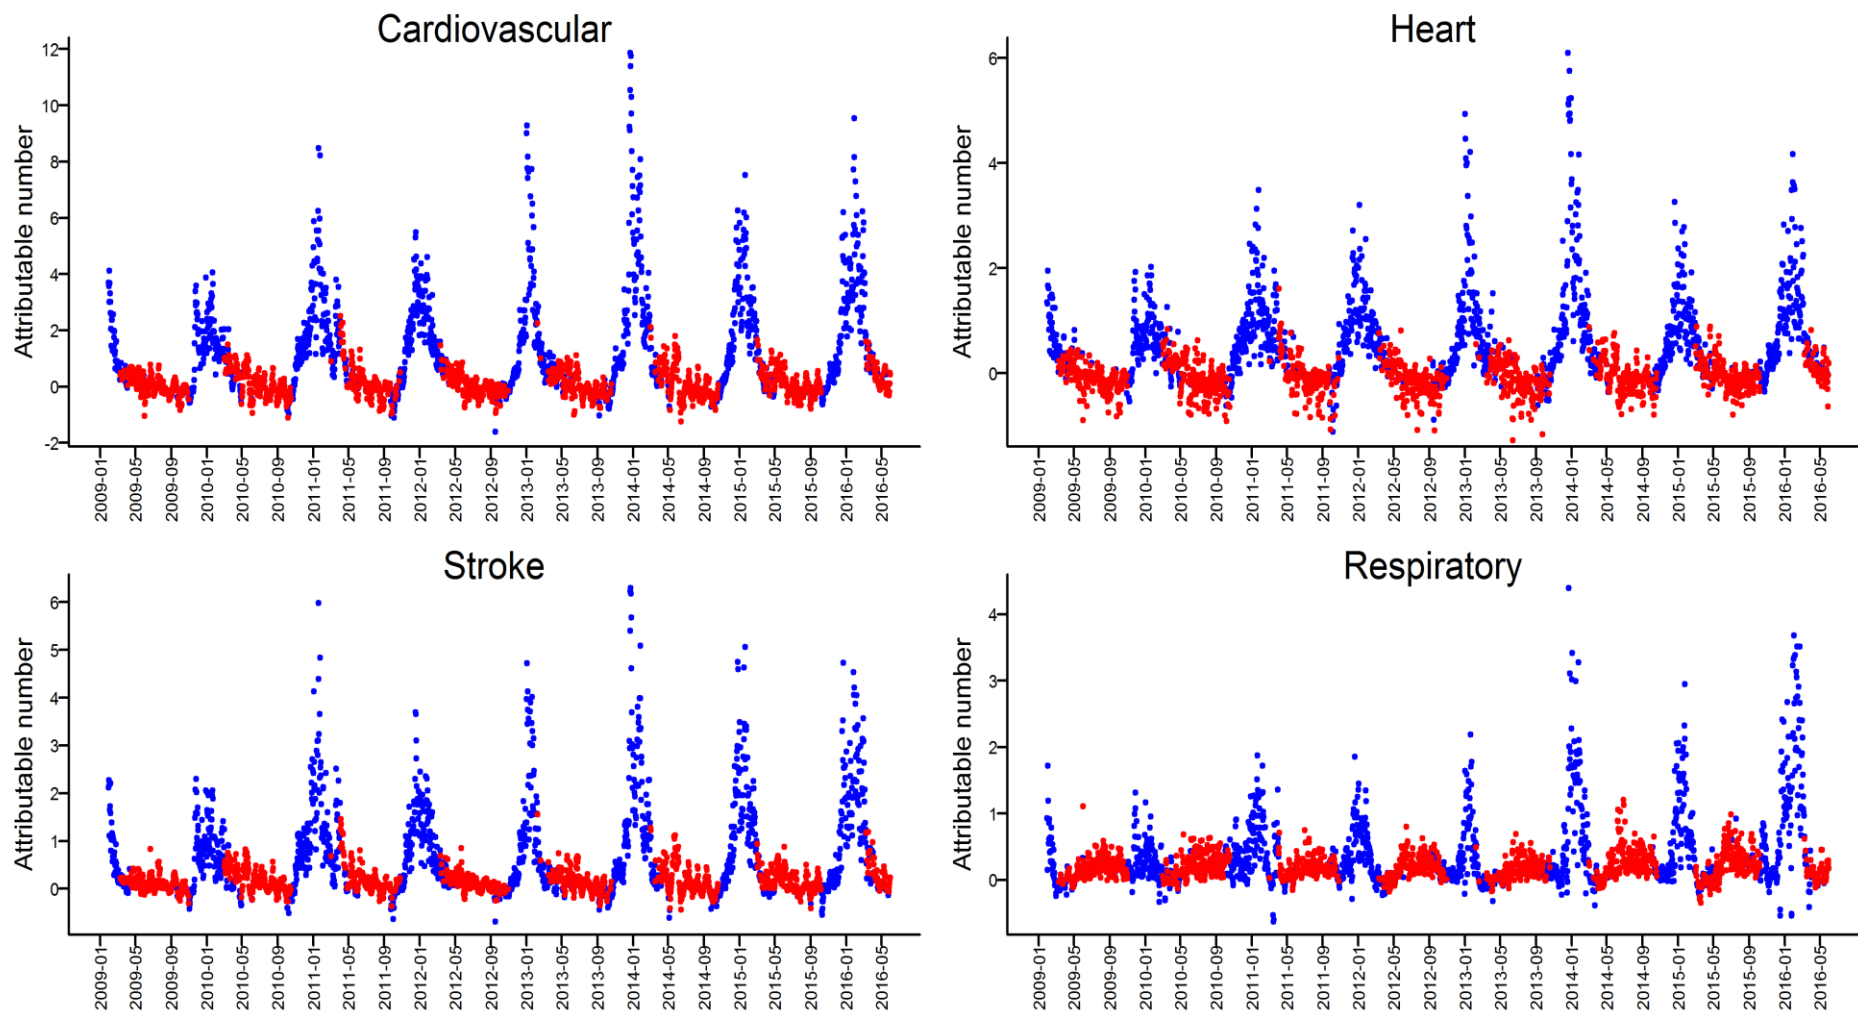

**Figure S1.** Daily number of cardiovascular, heart, stroke and respiratory deaths attributable to cold (blue points) and heat (red points) temperatures.
